# Supplementary material for: Immunological Misfiring and Sex Differences/Similarities in Early COVID-19 Studies: Missed Opportunities of Making a Real IMPACT
Source: Preprints.org preprint supplement (doi:10.20944/preprints202308.1132.v1), 2023-08-16
Supplement: Supplementary file 1 [file supplementary]

**Table S1**. SARS-CoV-2 viral load in nasopharyngeal (Np) and saliva samples in IMPACT Cohort patients.

Breakdown of a total of 179* data points from a total of 98 patients. Two or more longitudinal data points were collected from a total of 59 patients that were hospitalized in Yale between March and May of 2020. *: DFSO for a few patients were missing/not reported and hence those patients were not included in our analysis for DFSO. Numbers in parenthesis (0) indicates patients with confirmed 0 values for viral load in both saliva and Np samples. Missing values represent samples was not collected and/or tested. The numbers in the middle column is the actual patients used in our reanalysis.

| DFSO | Patient Data Points | | | S or Nps> 0 | | | S or Nps = Missing/0 | | |
| --- | --- | --- | --- | --- | --- | --- | --- | --- | --- |
|  | Both | Female | Male | Both | Female | Male | Both | Female | Male |
| 1-3 | 6 | 5 | 1 | 3 | 2 | 1 | 3 (2) | 3 (2) | 0 (0) |
| 4-6 | 14 | 7 | 7 | 11 | 5 | 6 | 3 (0) | 2 (0) | 1 (0) |
| 7-10 | 37 | 18 | 19 | 19 | 8 | 11 | 16 (8) | 10 (6) | 6 (2) |
| 11-14 | 44 | 21 | 23 | 26 | 12 | 14 | 18 (8) | 7 (2) | 11 (6) |
| 15-21 | 44 | 27 | 17 | 25 | 16 | 9 | 18 (6) | 13 (3) | 5 (3) |
| 22-27 | 19 | 11 | 8 | 4 | 1 | 3 | 18 (3) | 10 (1) | 8 (2) |
| ⩾ 28 | 15 | 7 | 8 | 5 | 2 | 3 | 10 (2) | 5 (1) | 5 (1) |
| TOTAL | 179 | 96 | 83 | 93 | 46 | 47 | 86 (29) | 50 (15) | 36 (14) |

|  | Clinical Score | | | S or Nps > 0 | | | S or Nps = 0 | | |
| --- | --- | --- | --- | --- | --- | --- | --- | --- | --- |
|  | Both | Female | Male | Both | Female | Male | Both | Female | Male |
| 1 | 64 | 37 | 27 | 32 | 15 | 17 | 10 | 6 | 4 |
| 2 | 19 | 12 | 7 | 13 | 9 | 4 | 4 | 2 | 2 |
| 3 | 49 | 22 | 27 | 18 | 6 | 12 | 11 | 5 | 6 |
| 4 | 17 | 11 | 6 | 10 | 5 | 5 | 1 | 1 | 0 |
| 5 | 29 | 13 | 16 | 20 | 11 | 9 | 3 | 1 | 2 |
| TOTAL |  |  |  |  |  |  |  |  |  |
