# Supplementary figures and images for: Immunological Misfiring and Sex Differences/Similarities in Early COVID-19 Studies: Missed Opportunities of Making a Real IMPACT
Source: Preprints.org preprint supplement (doi:10.20944/preprints202308.1132.v1), 2023-08-16

Fig.S1a.

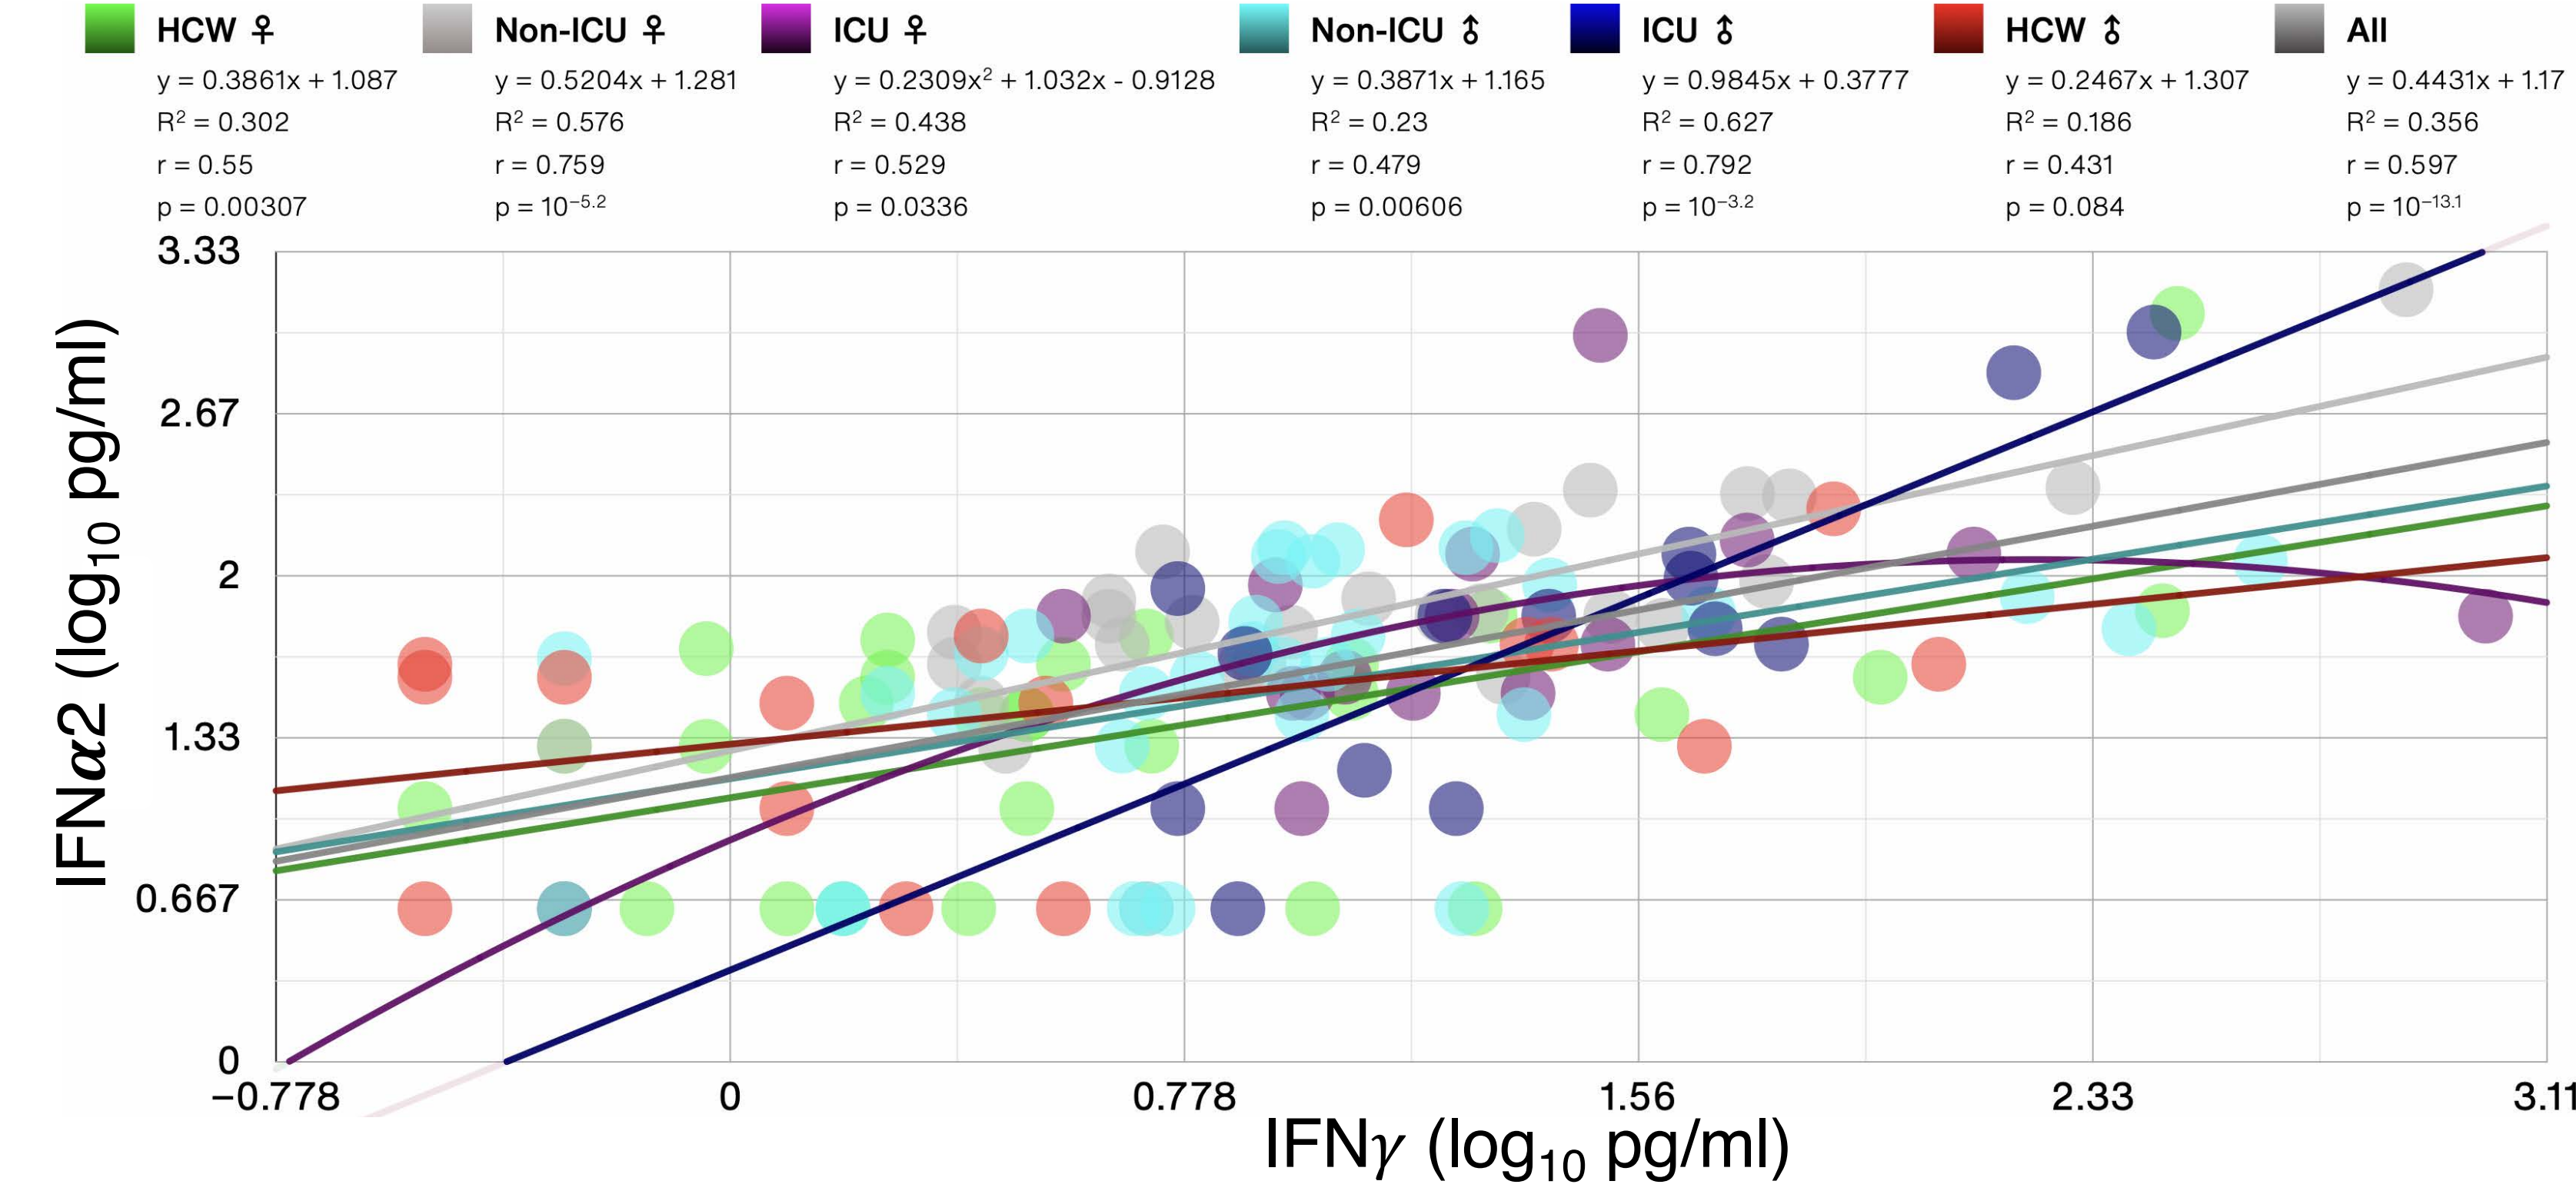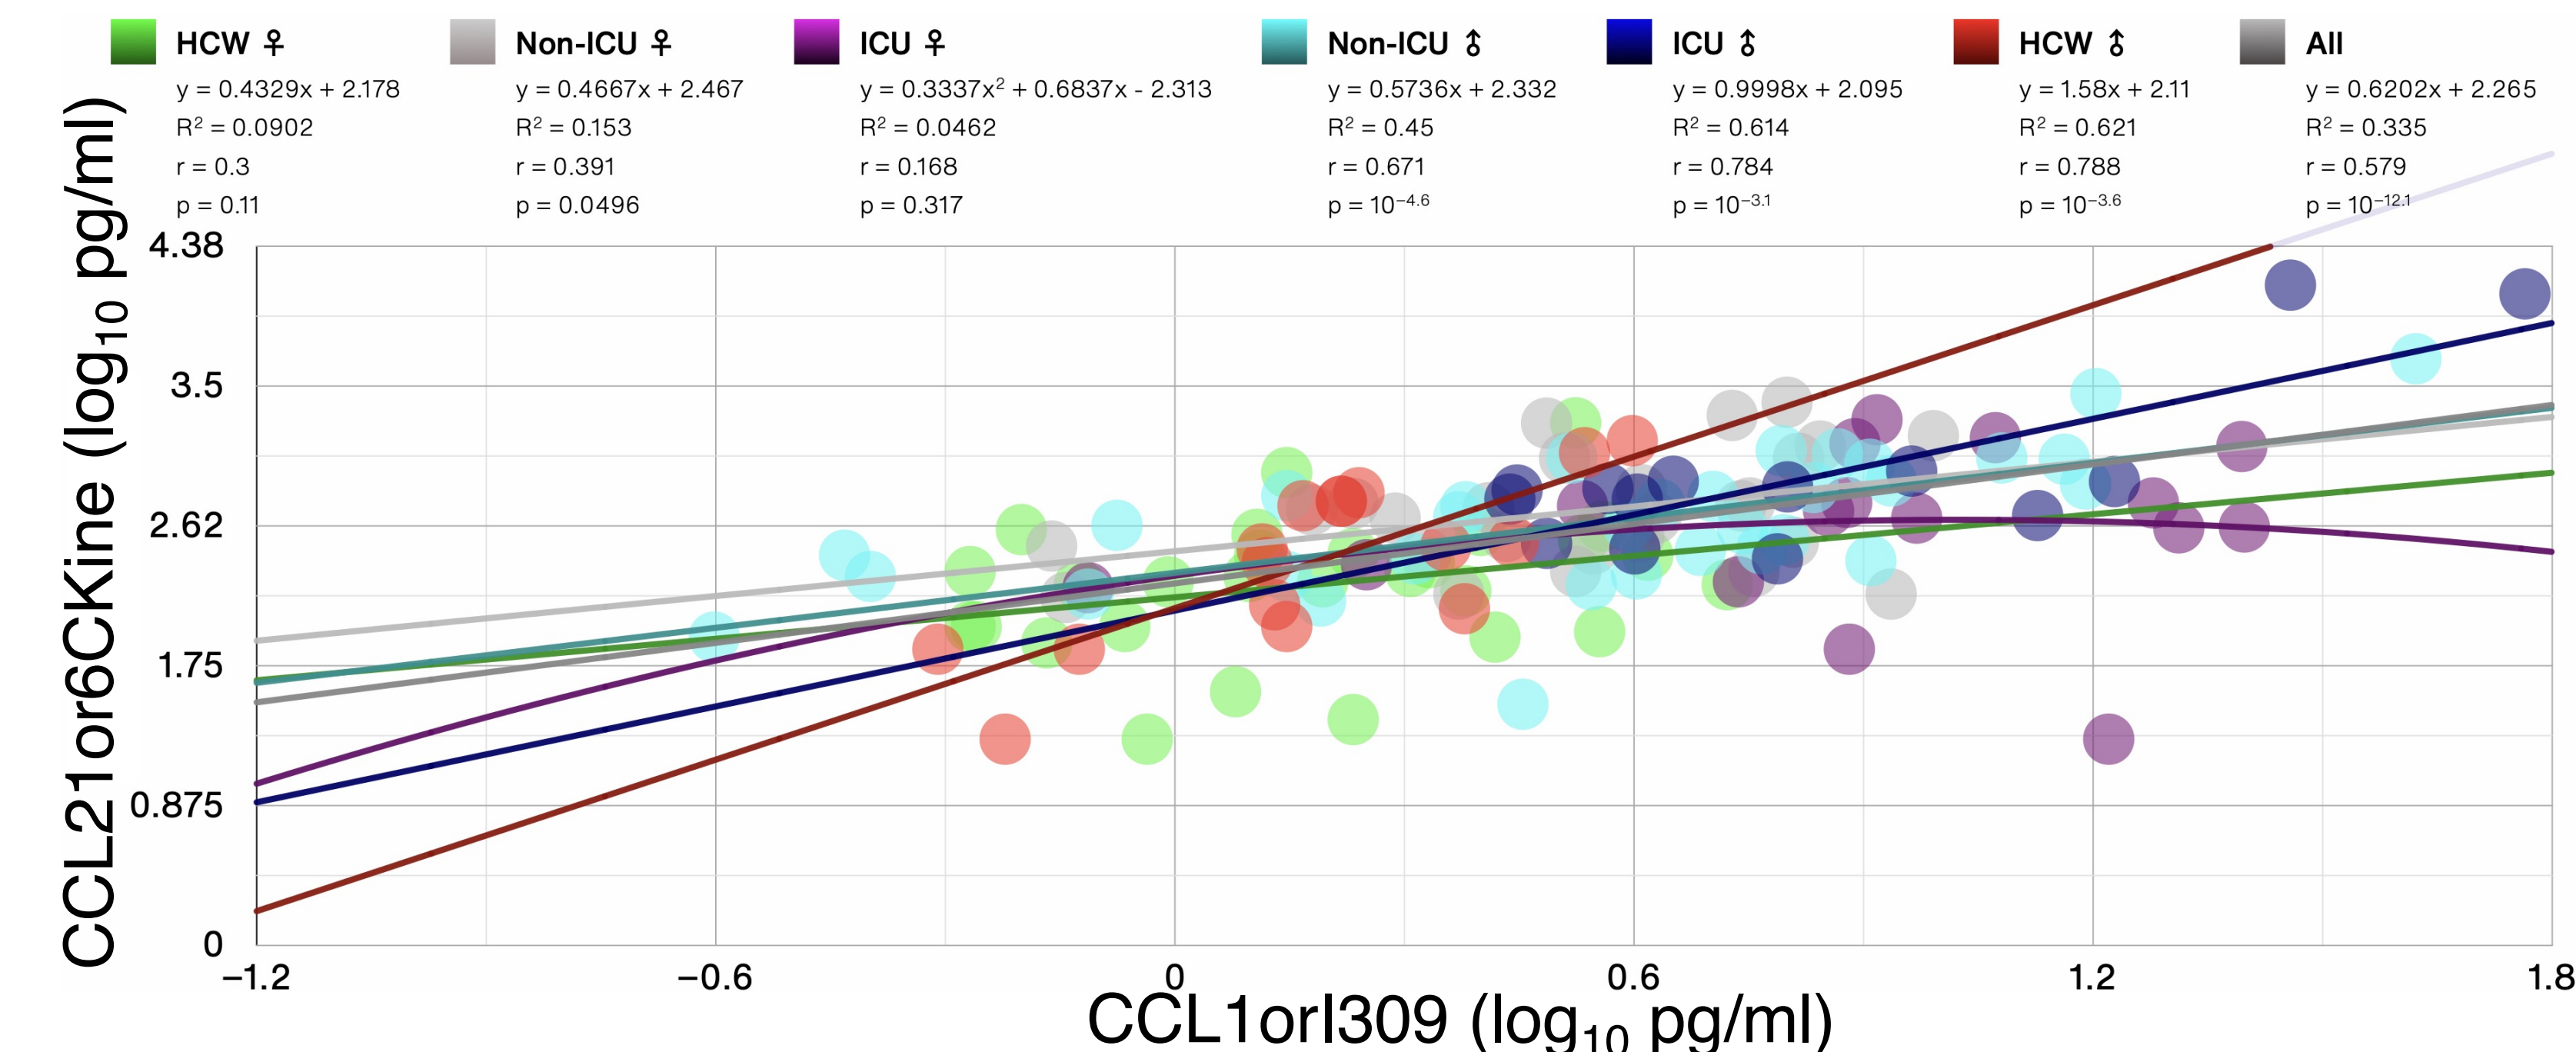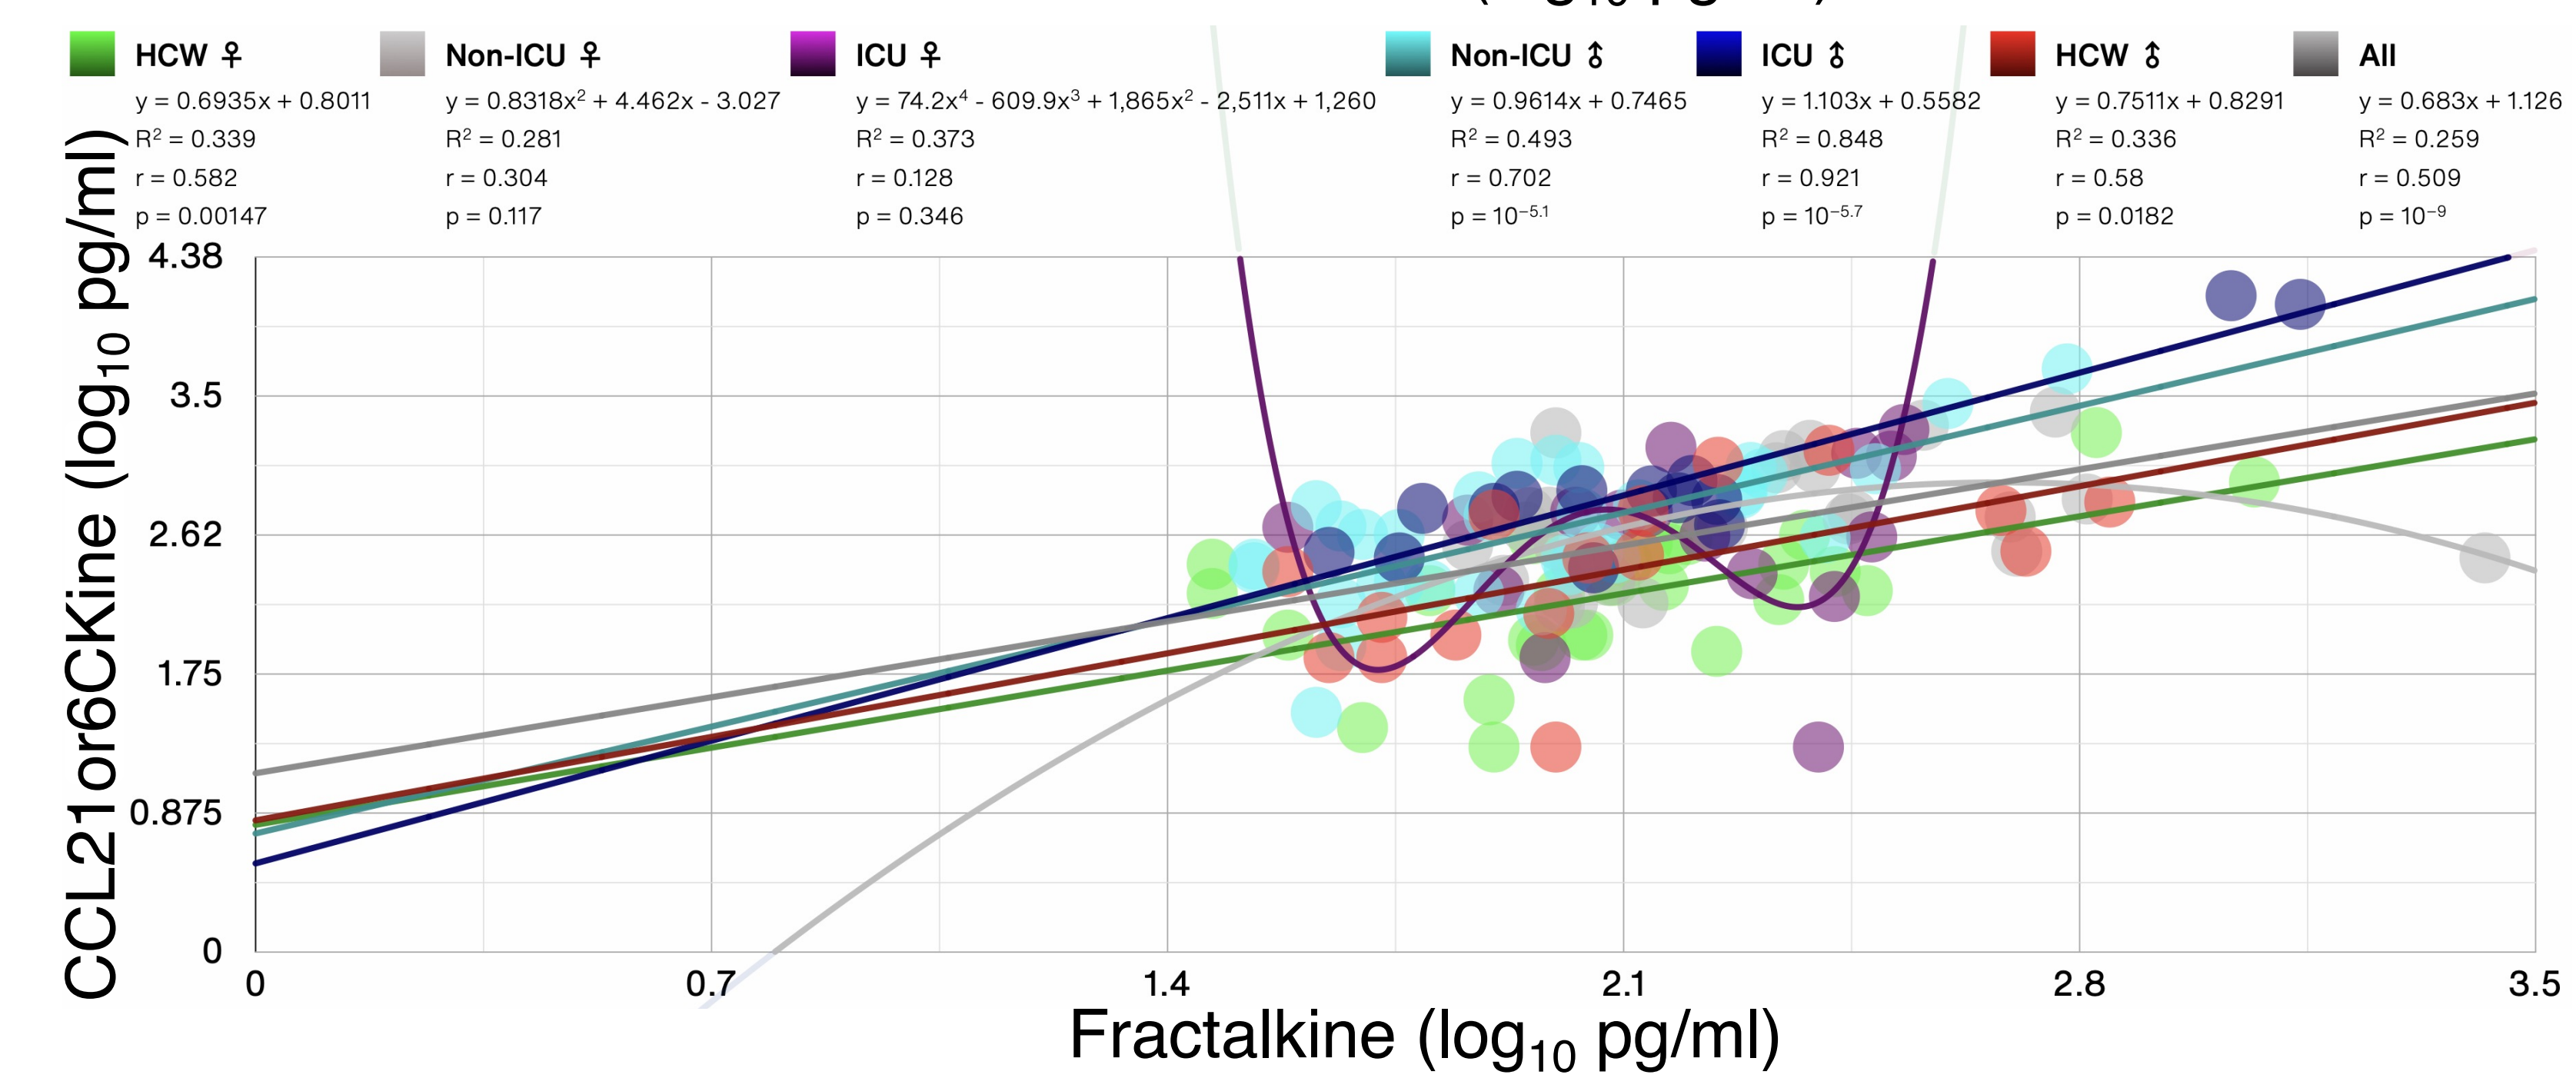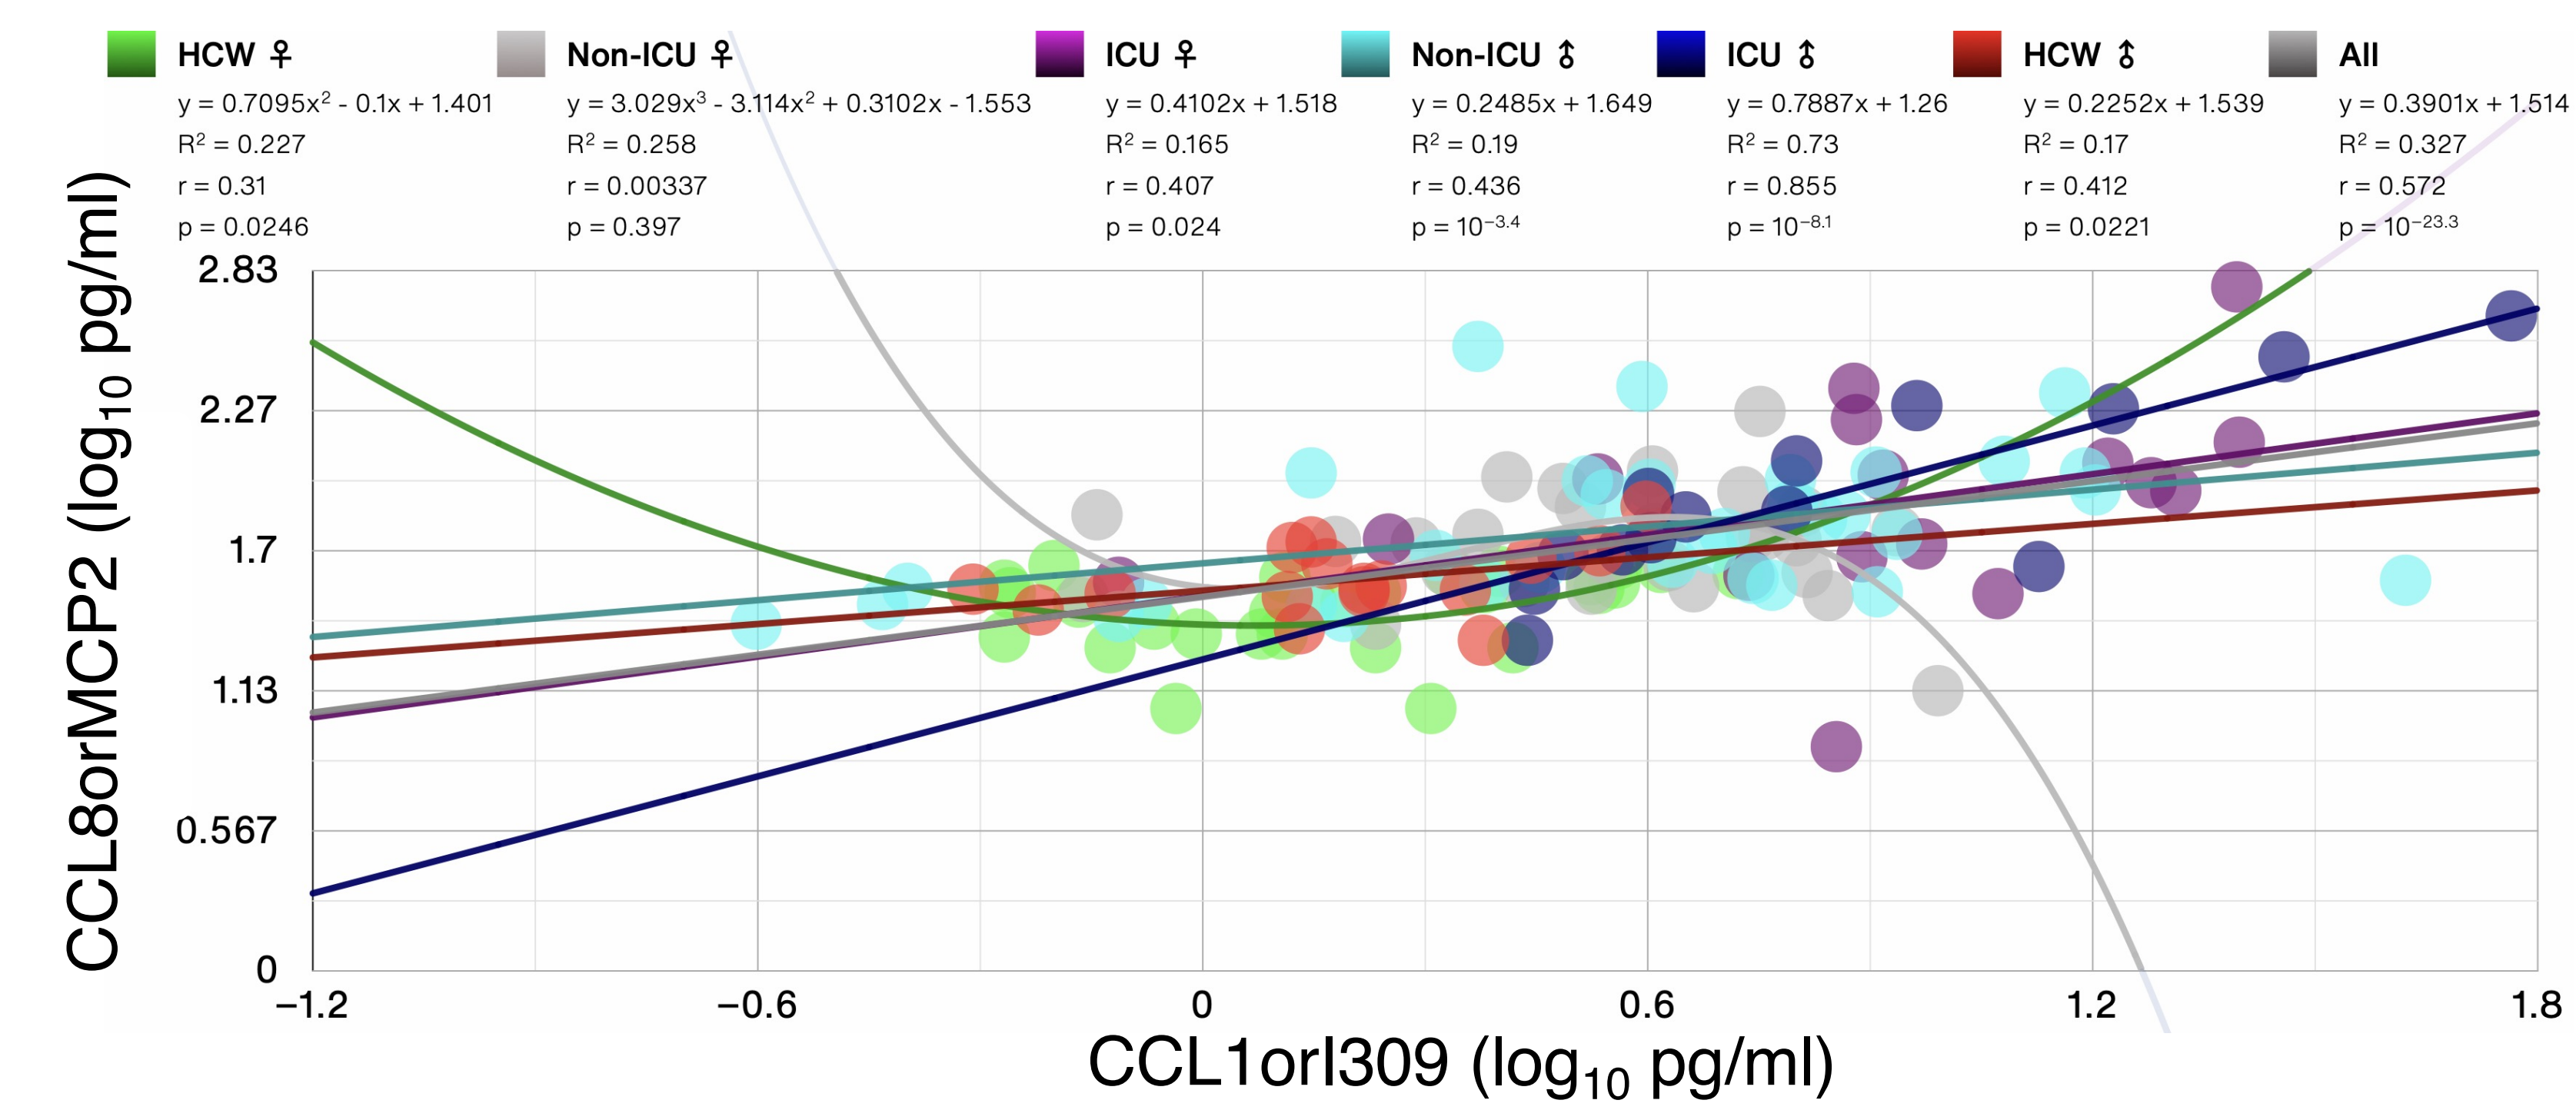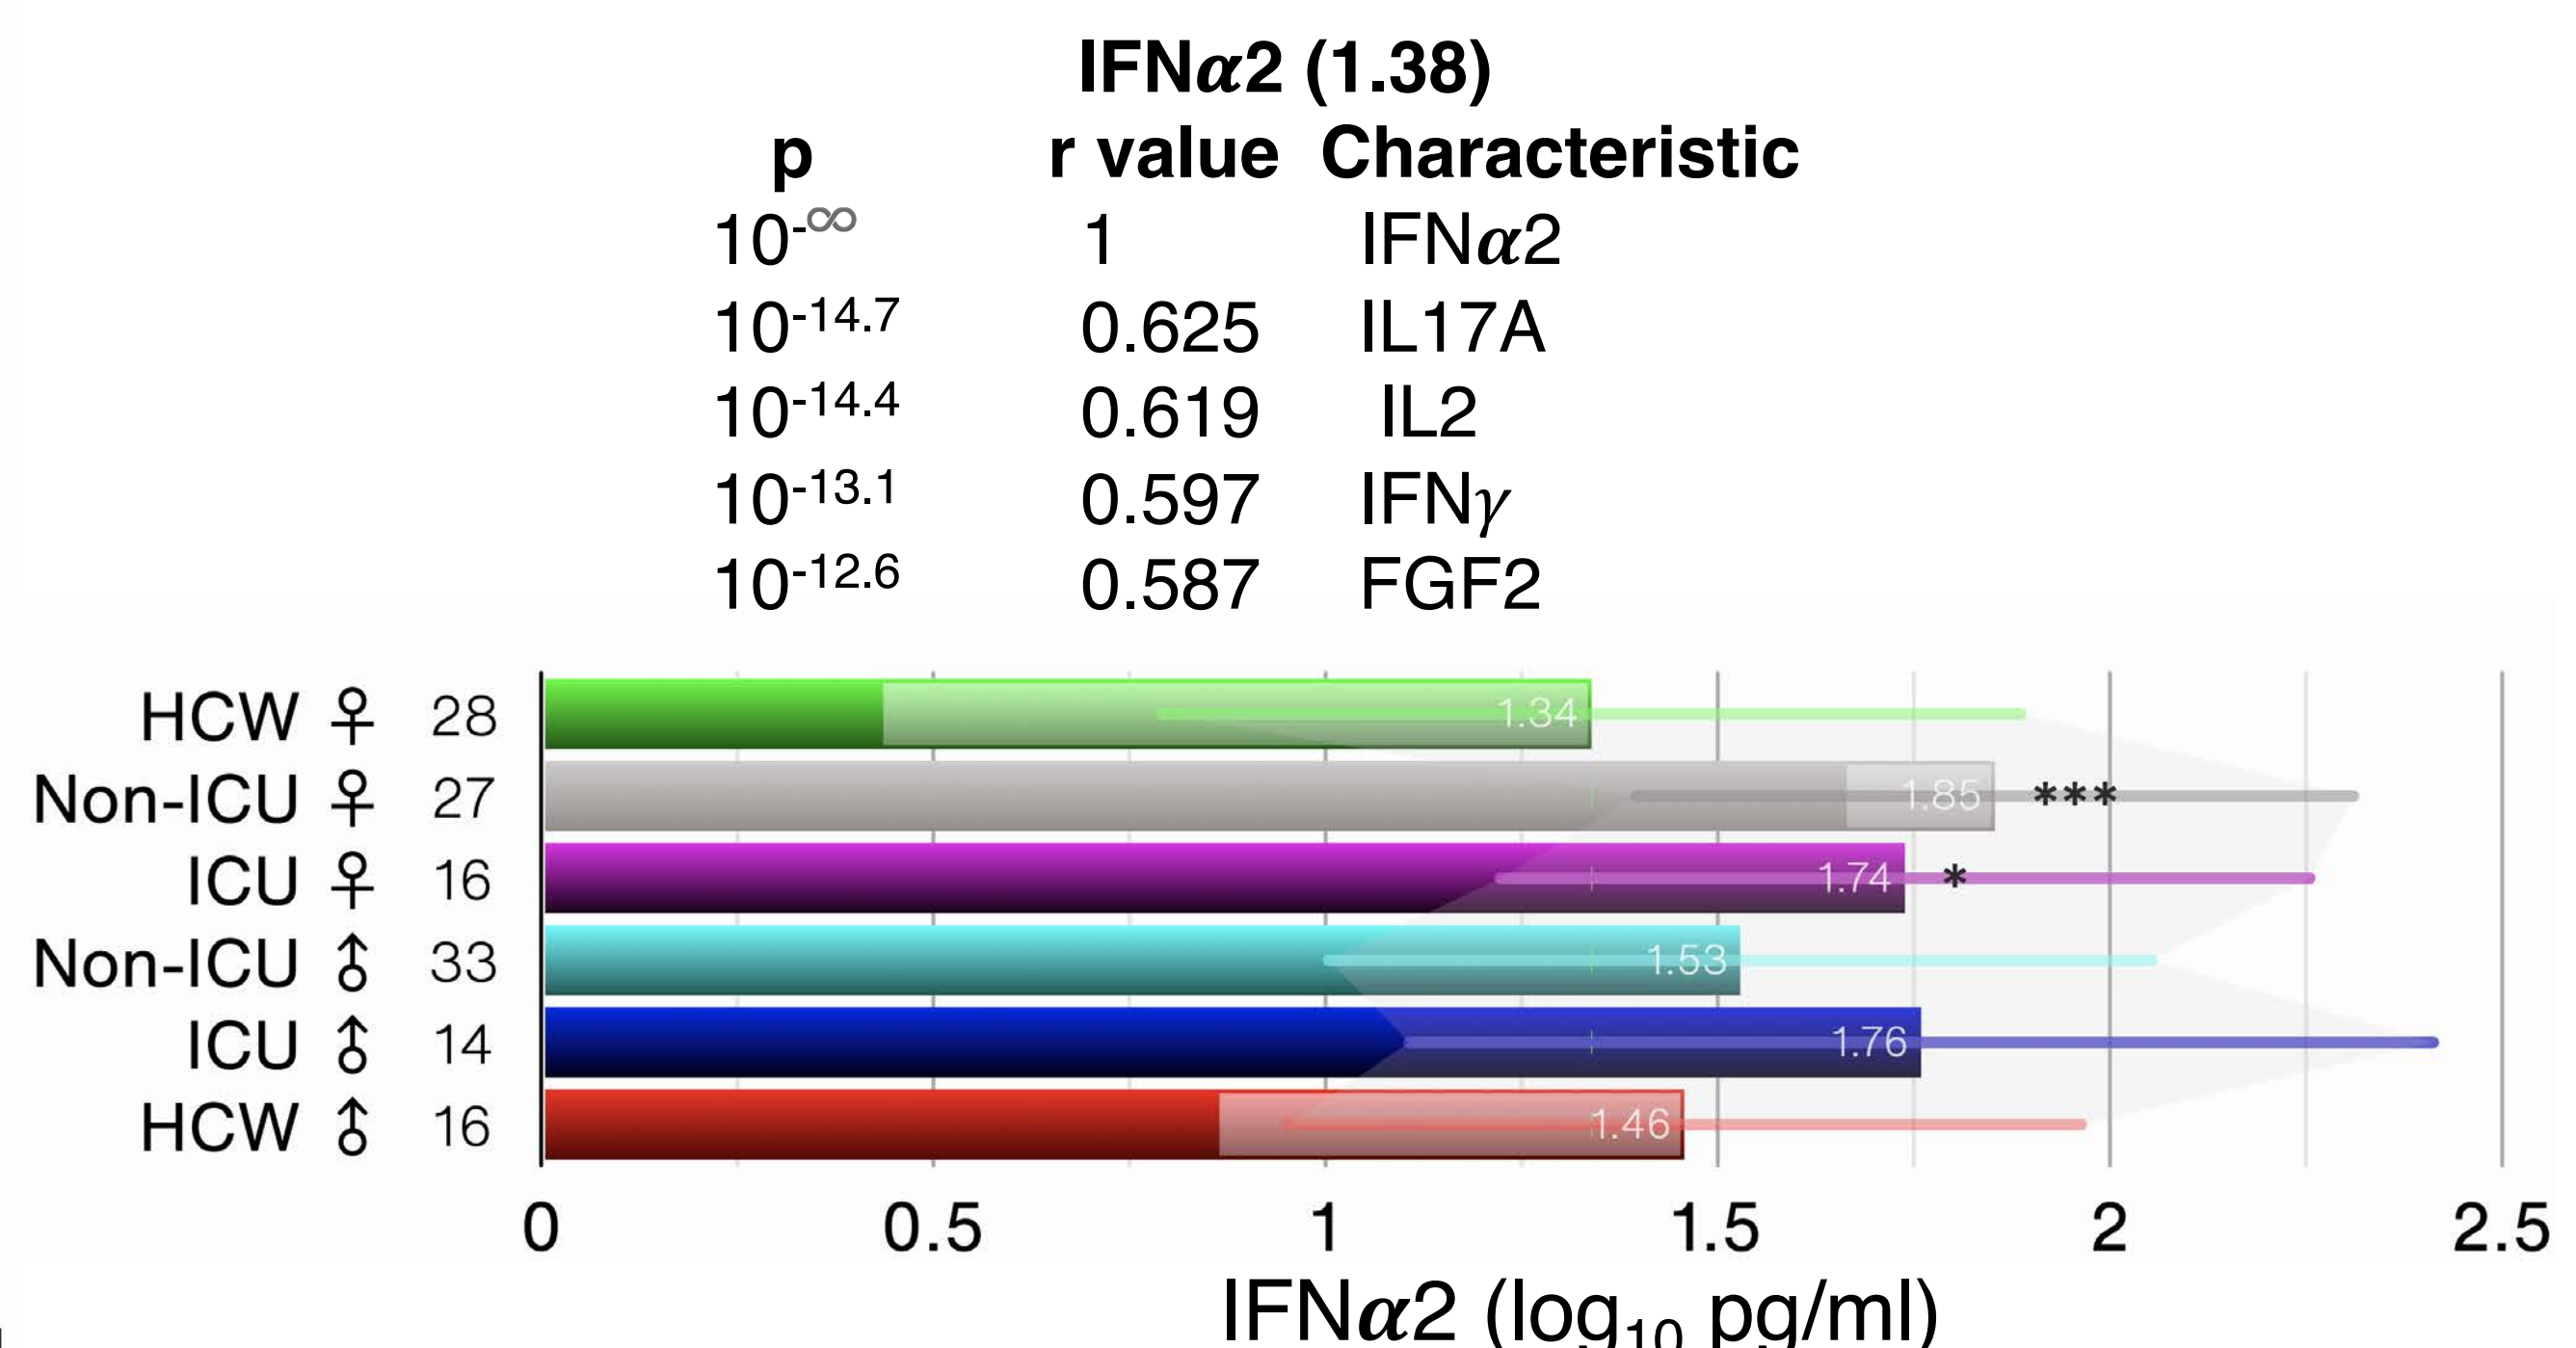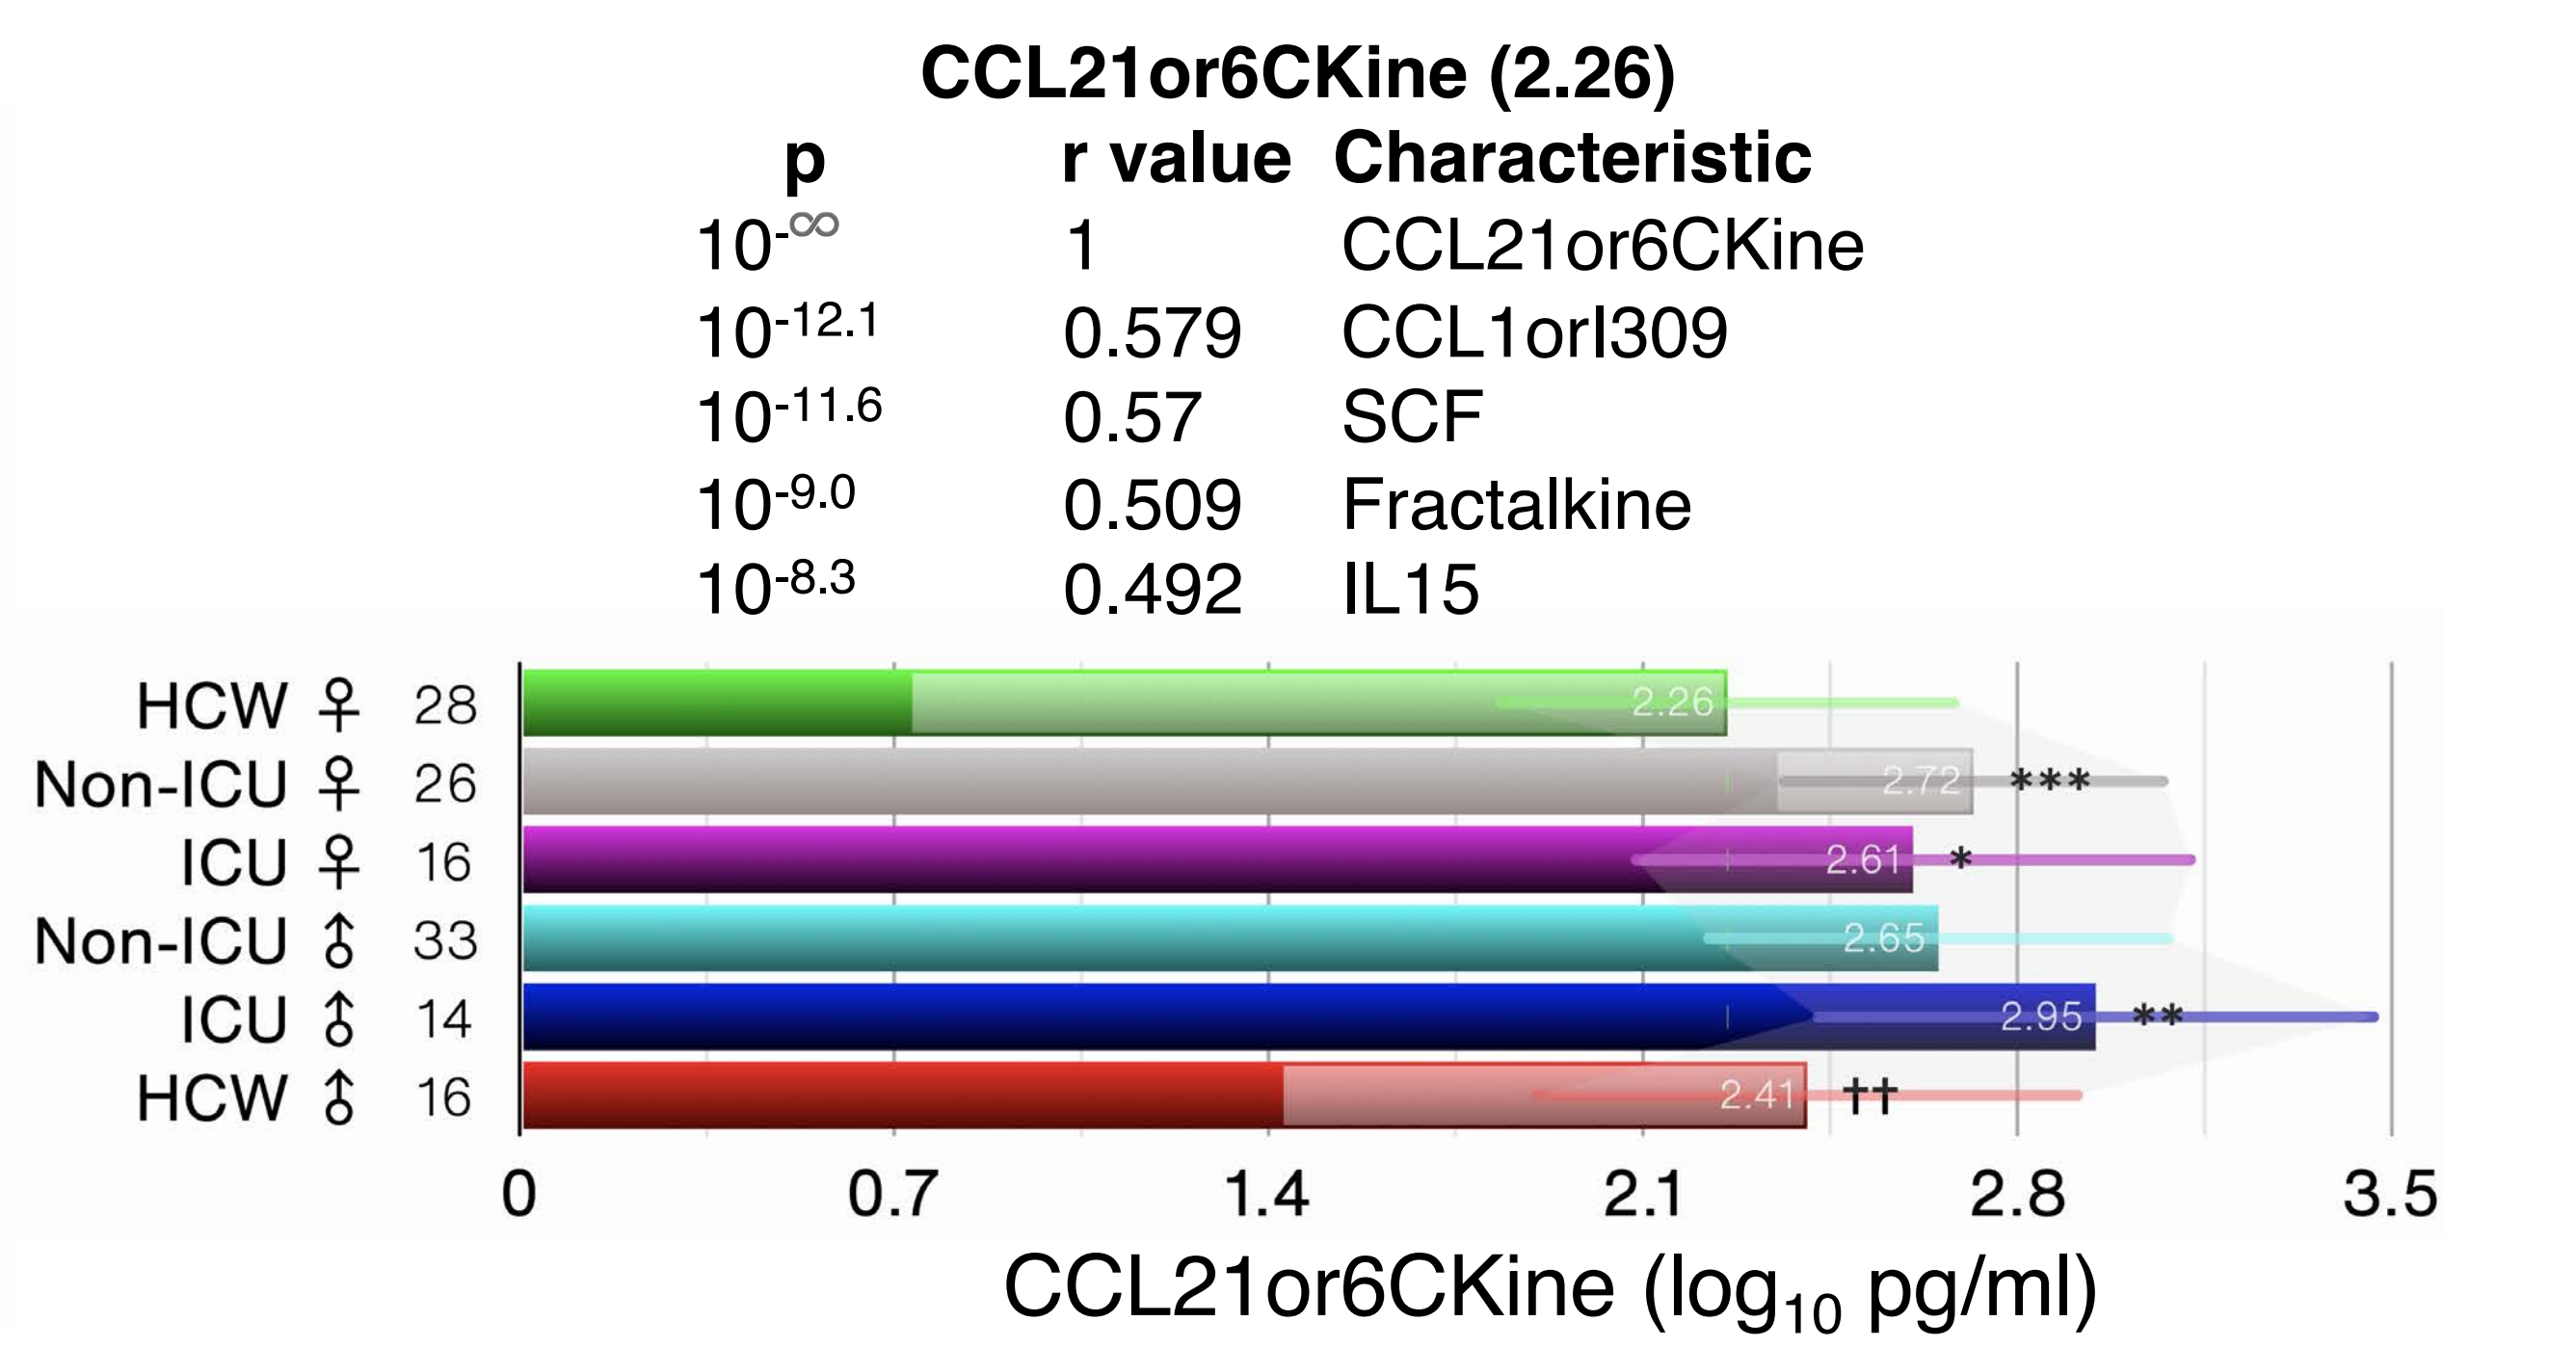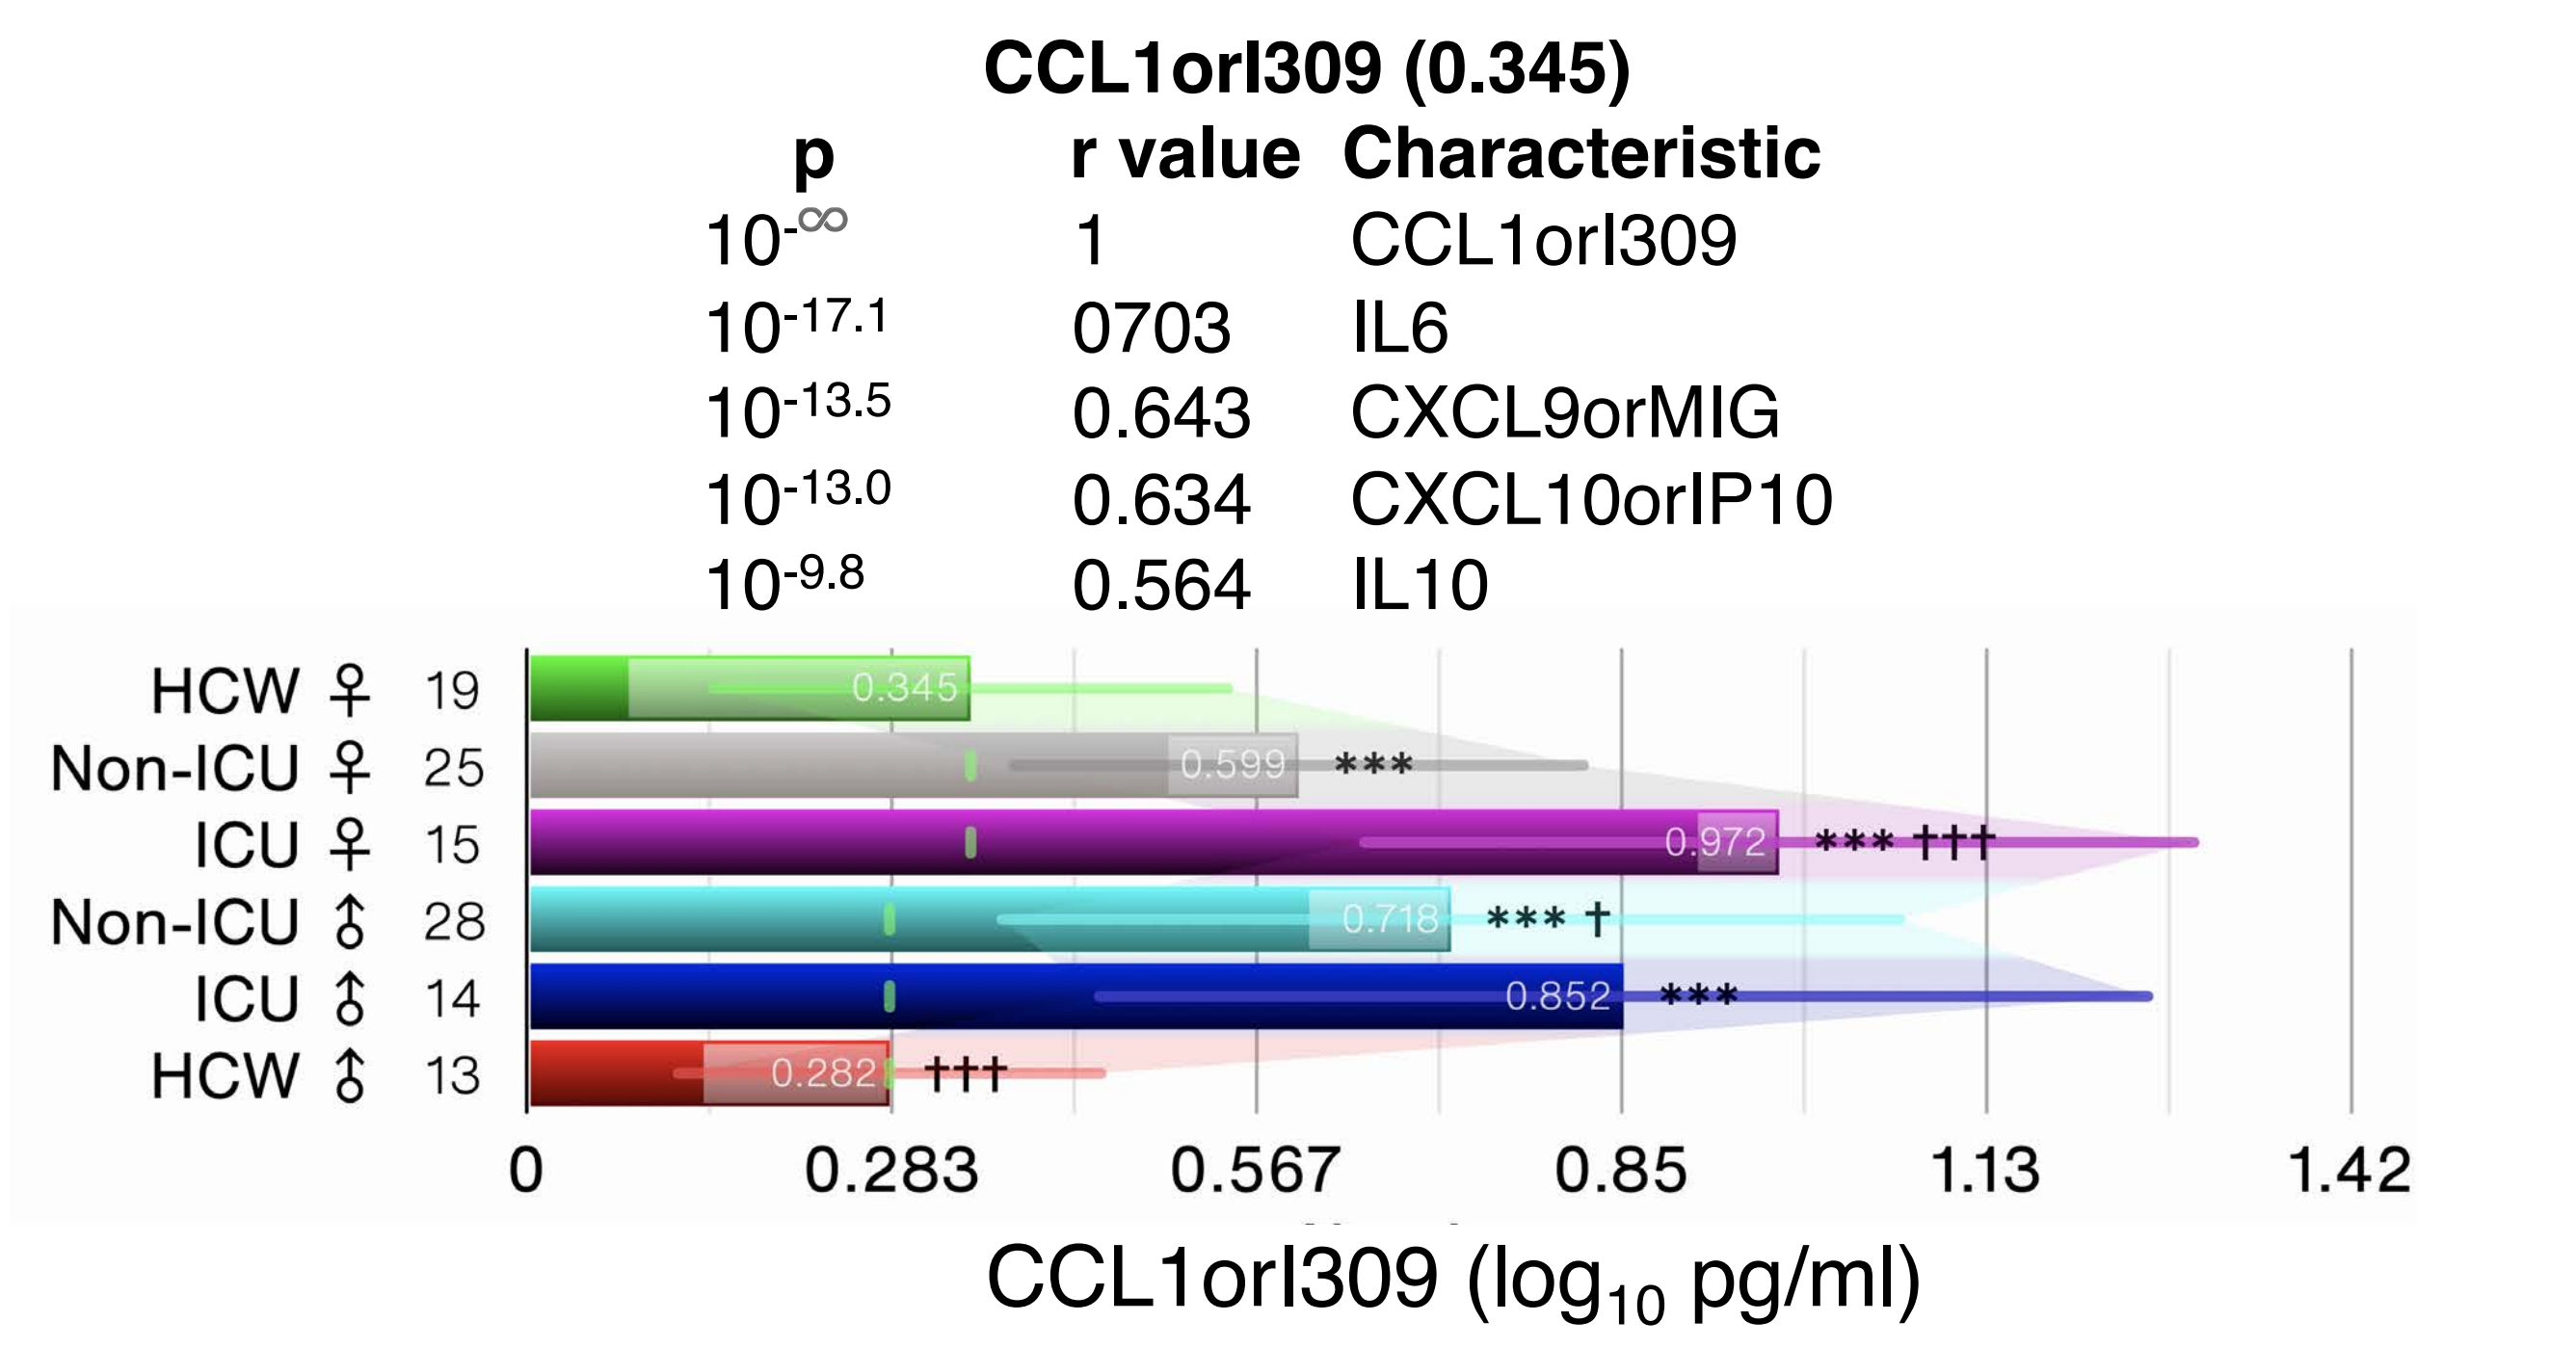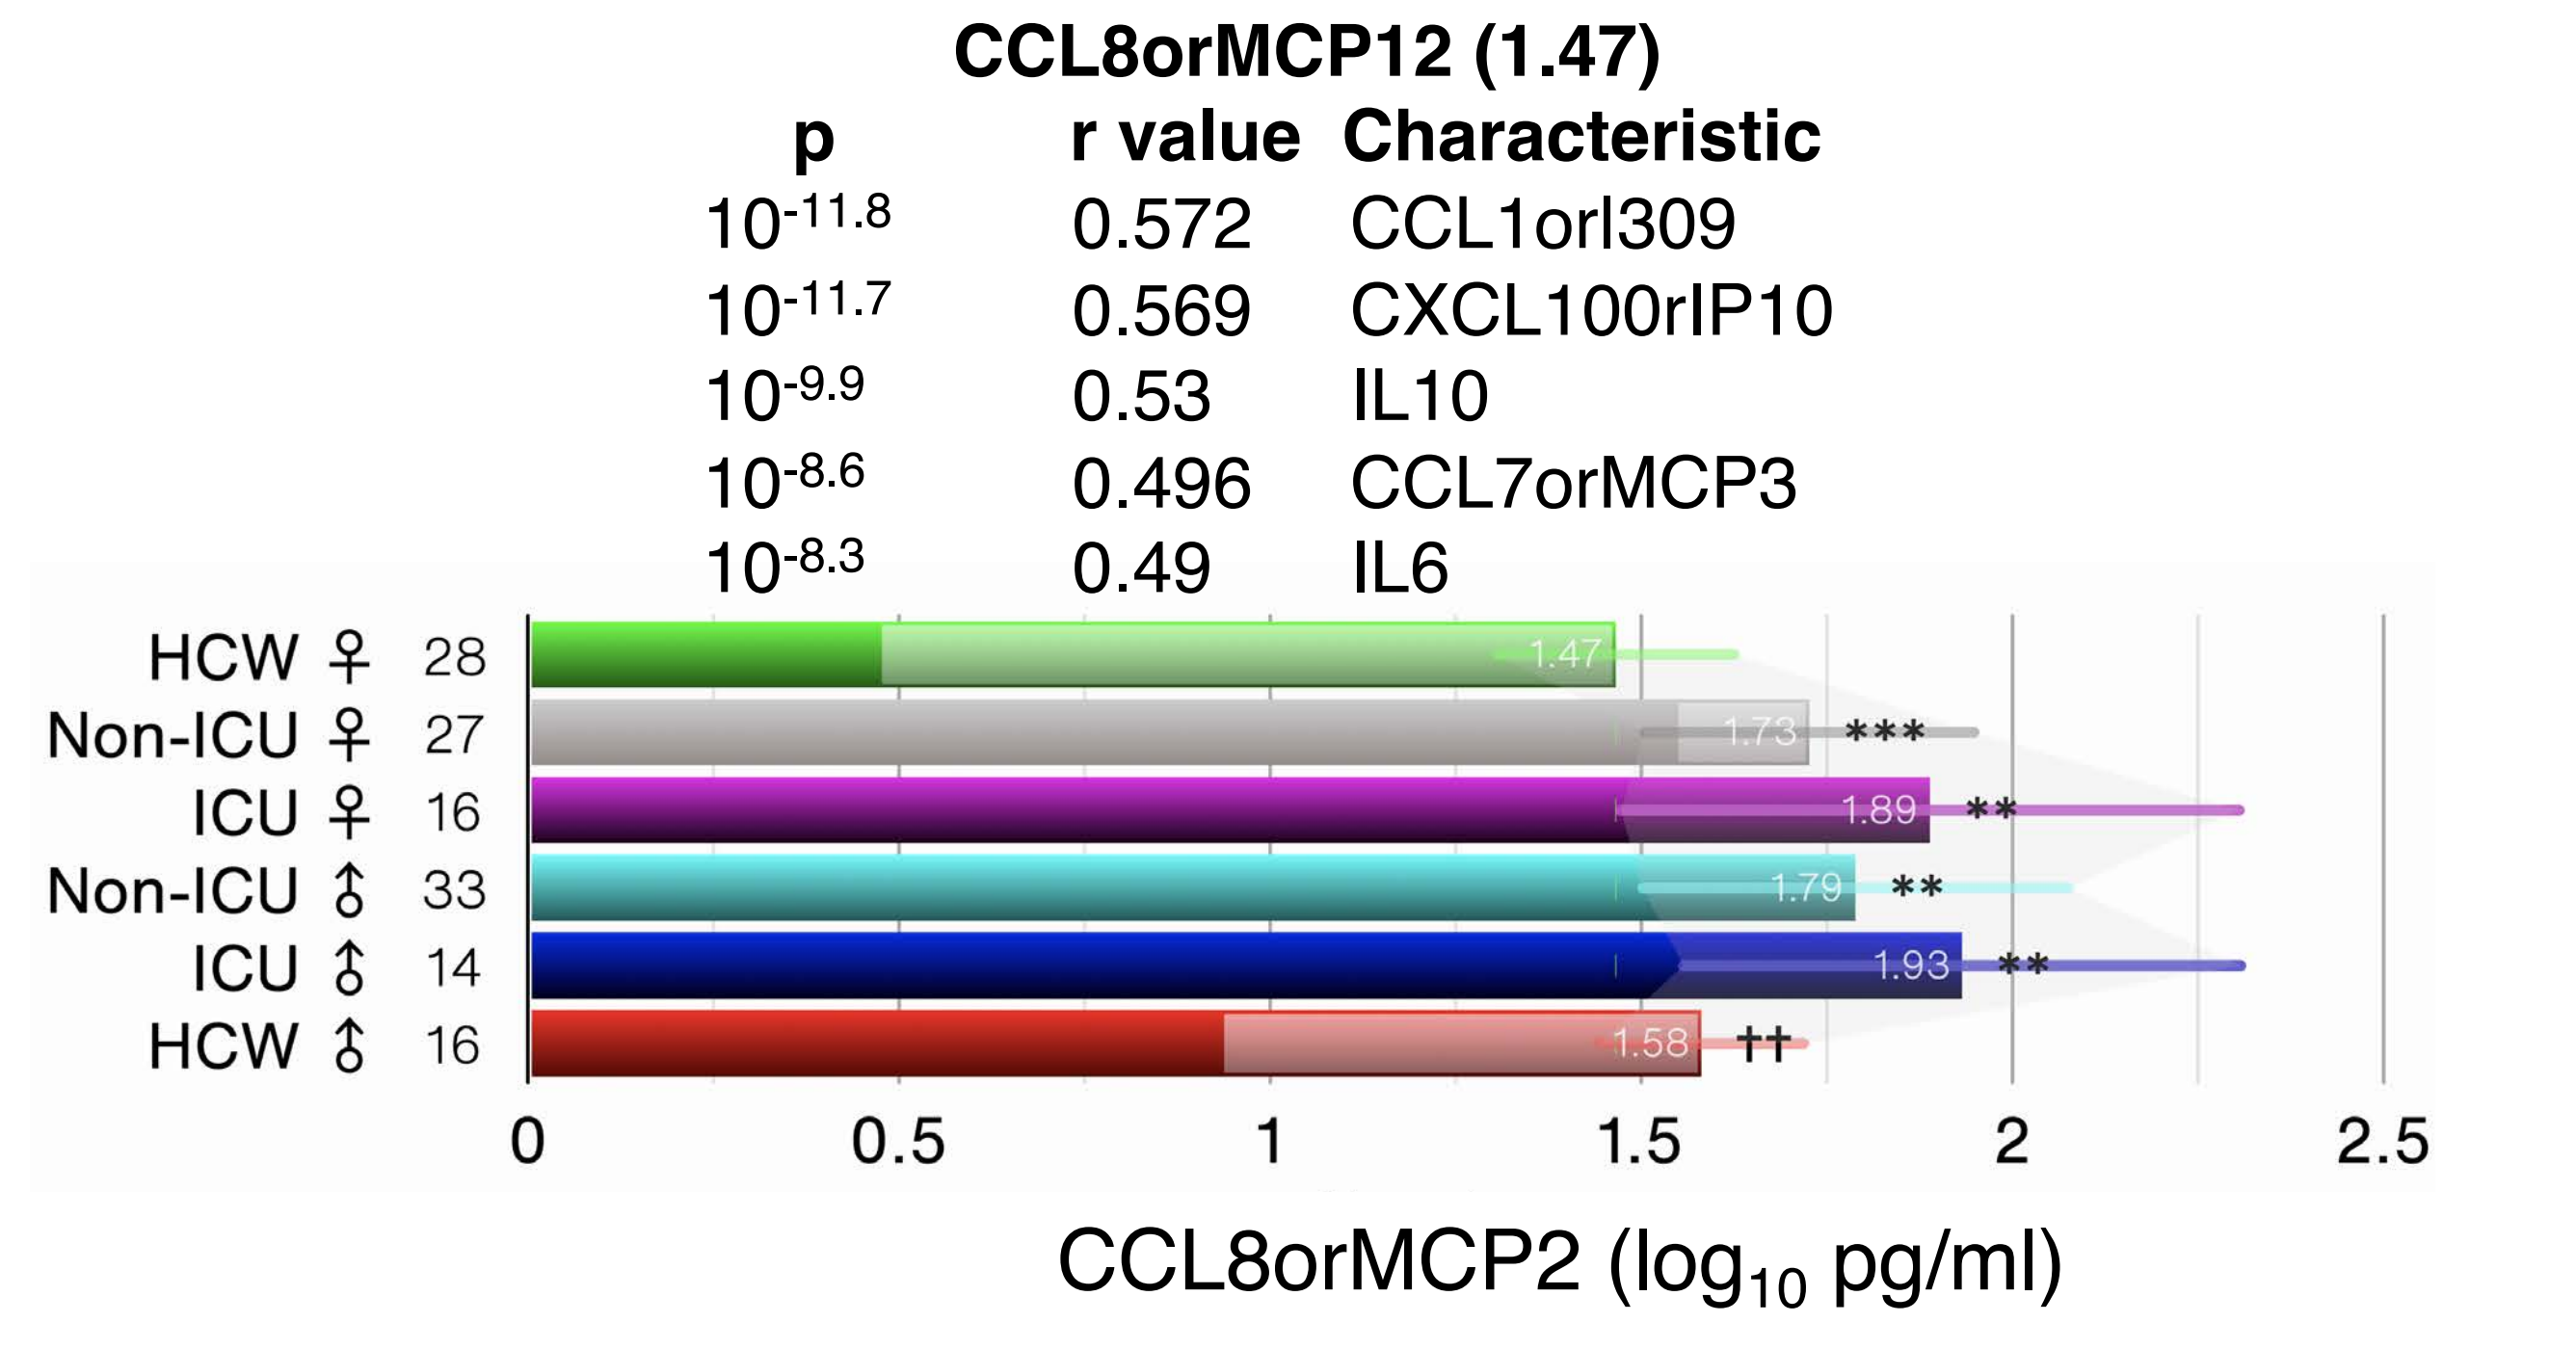



Fig. S2

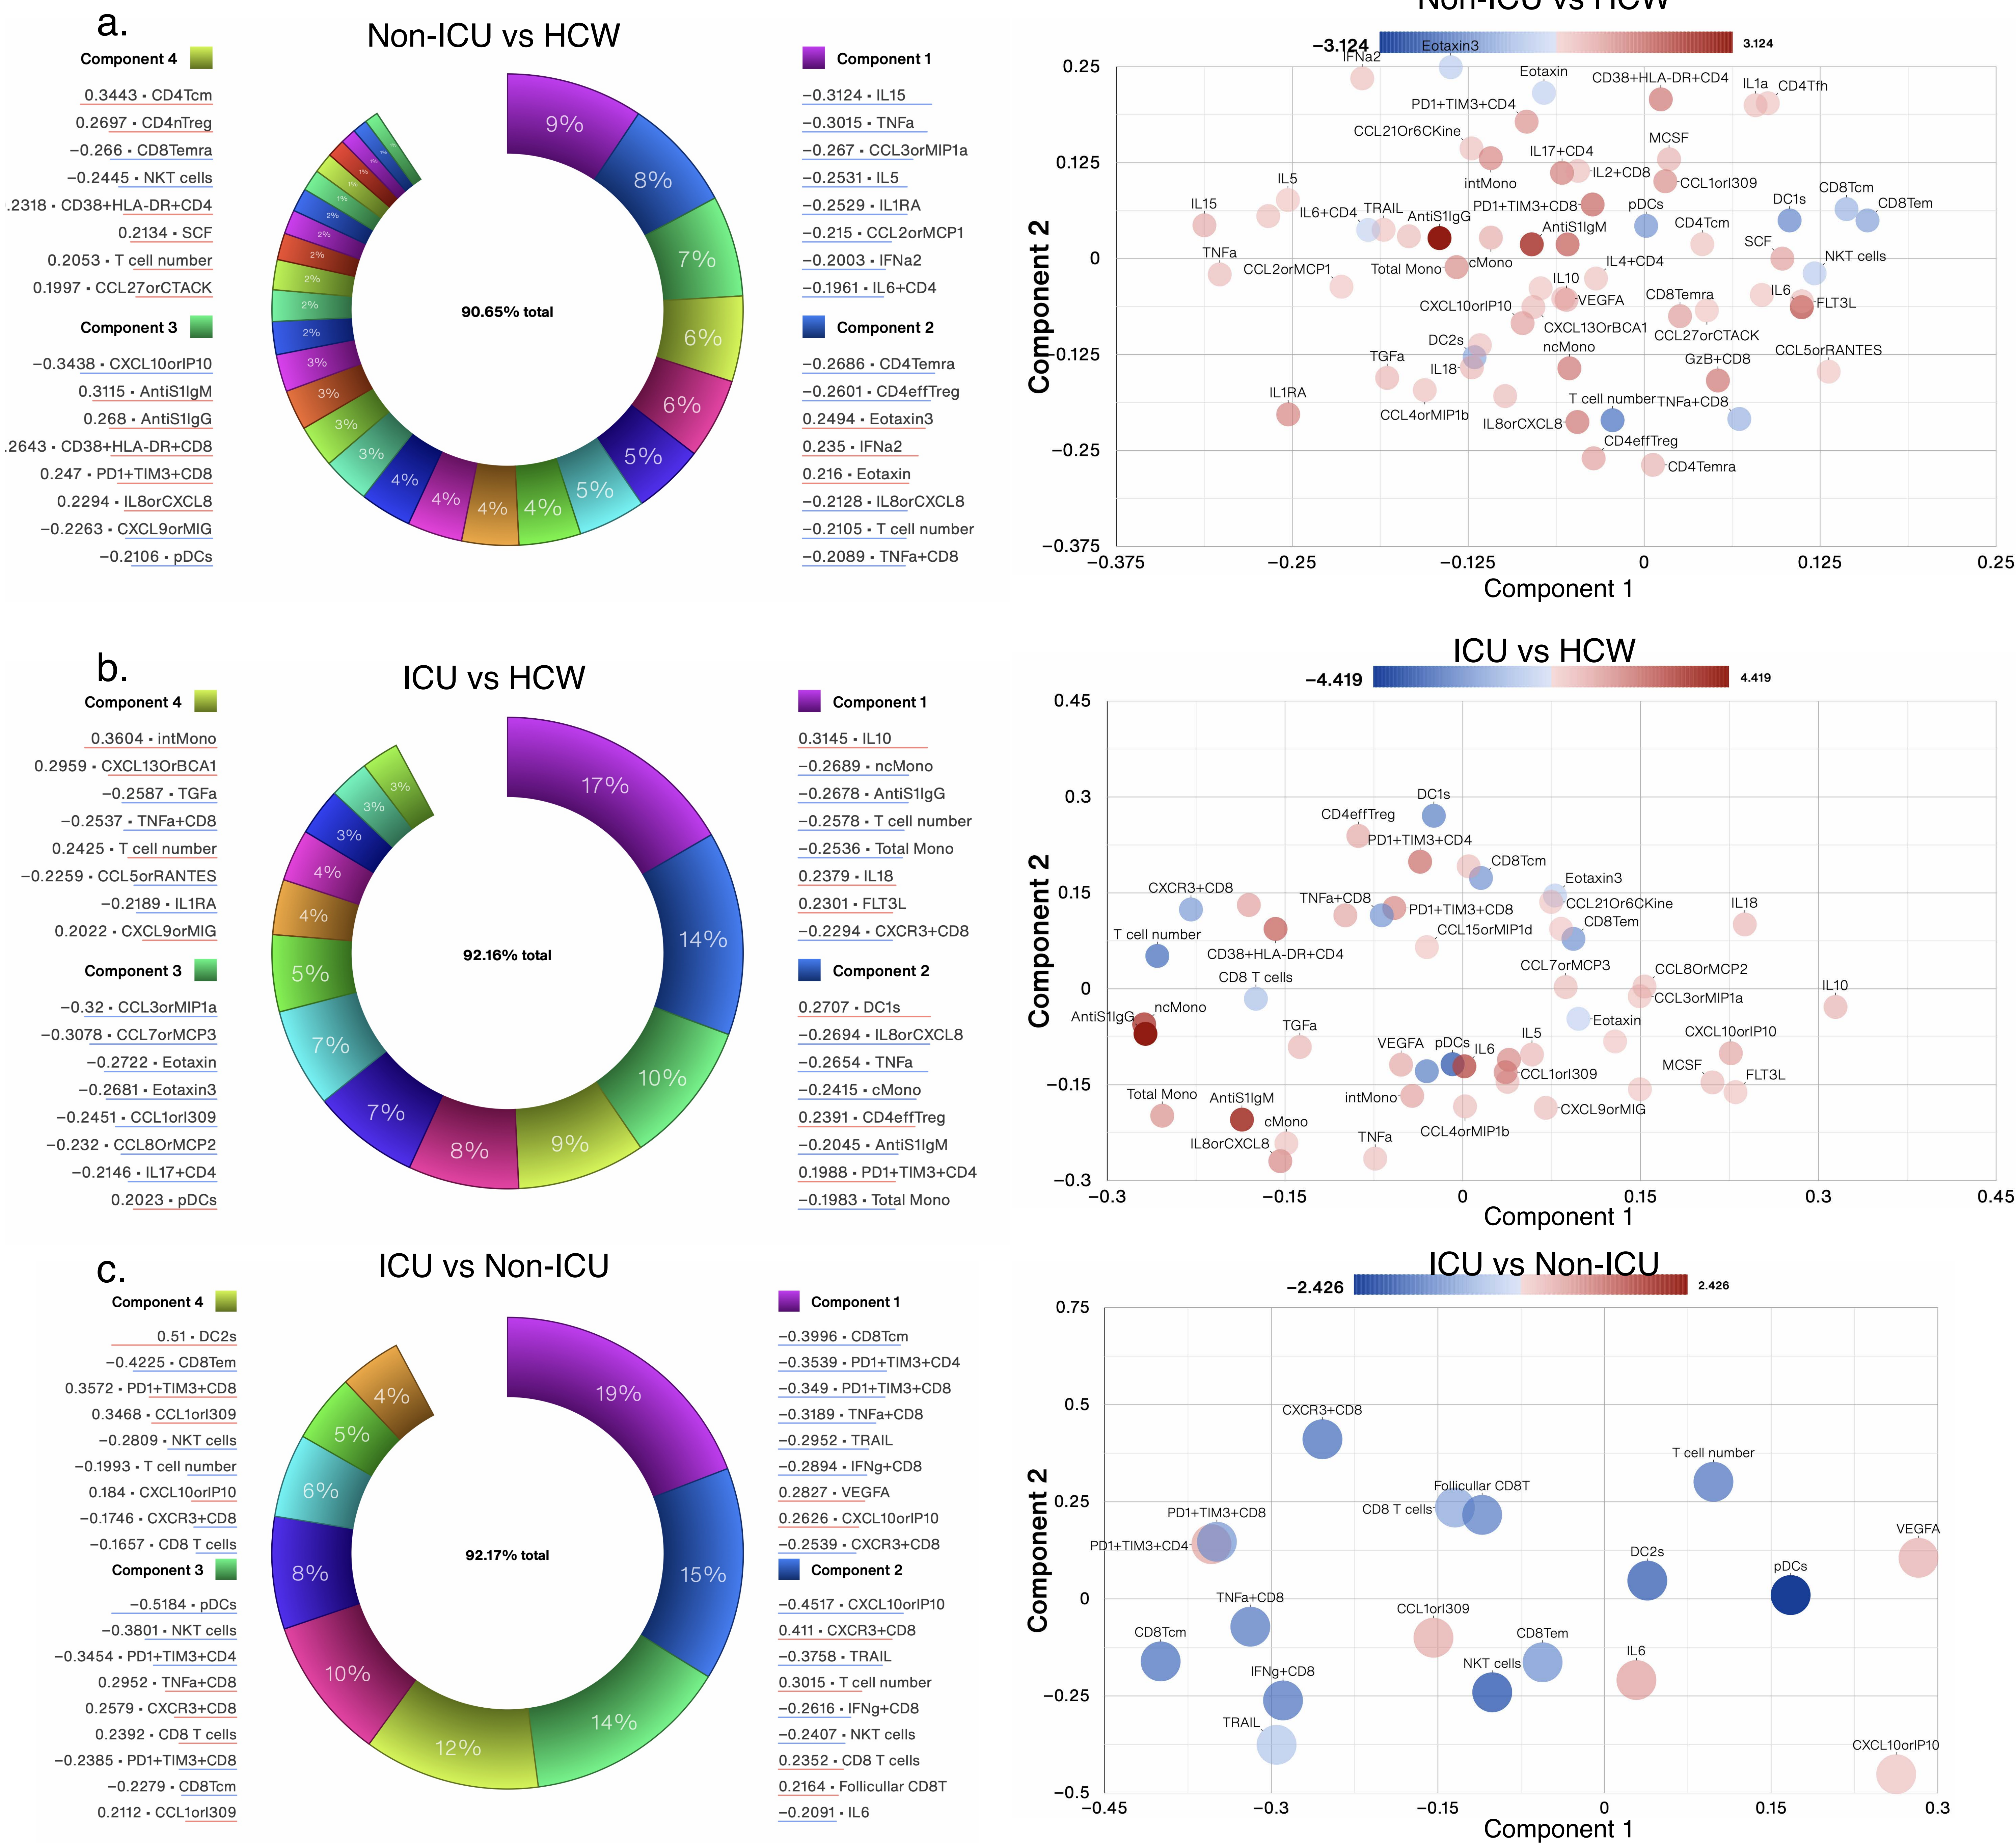



Fig. S2

d.

Deceased vs HCW

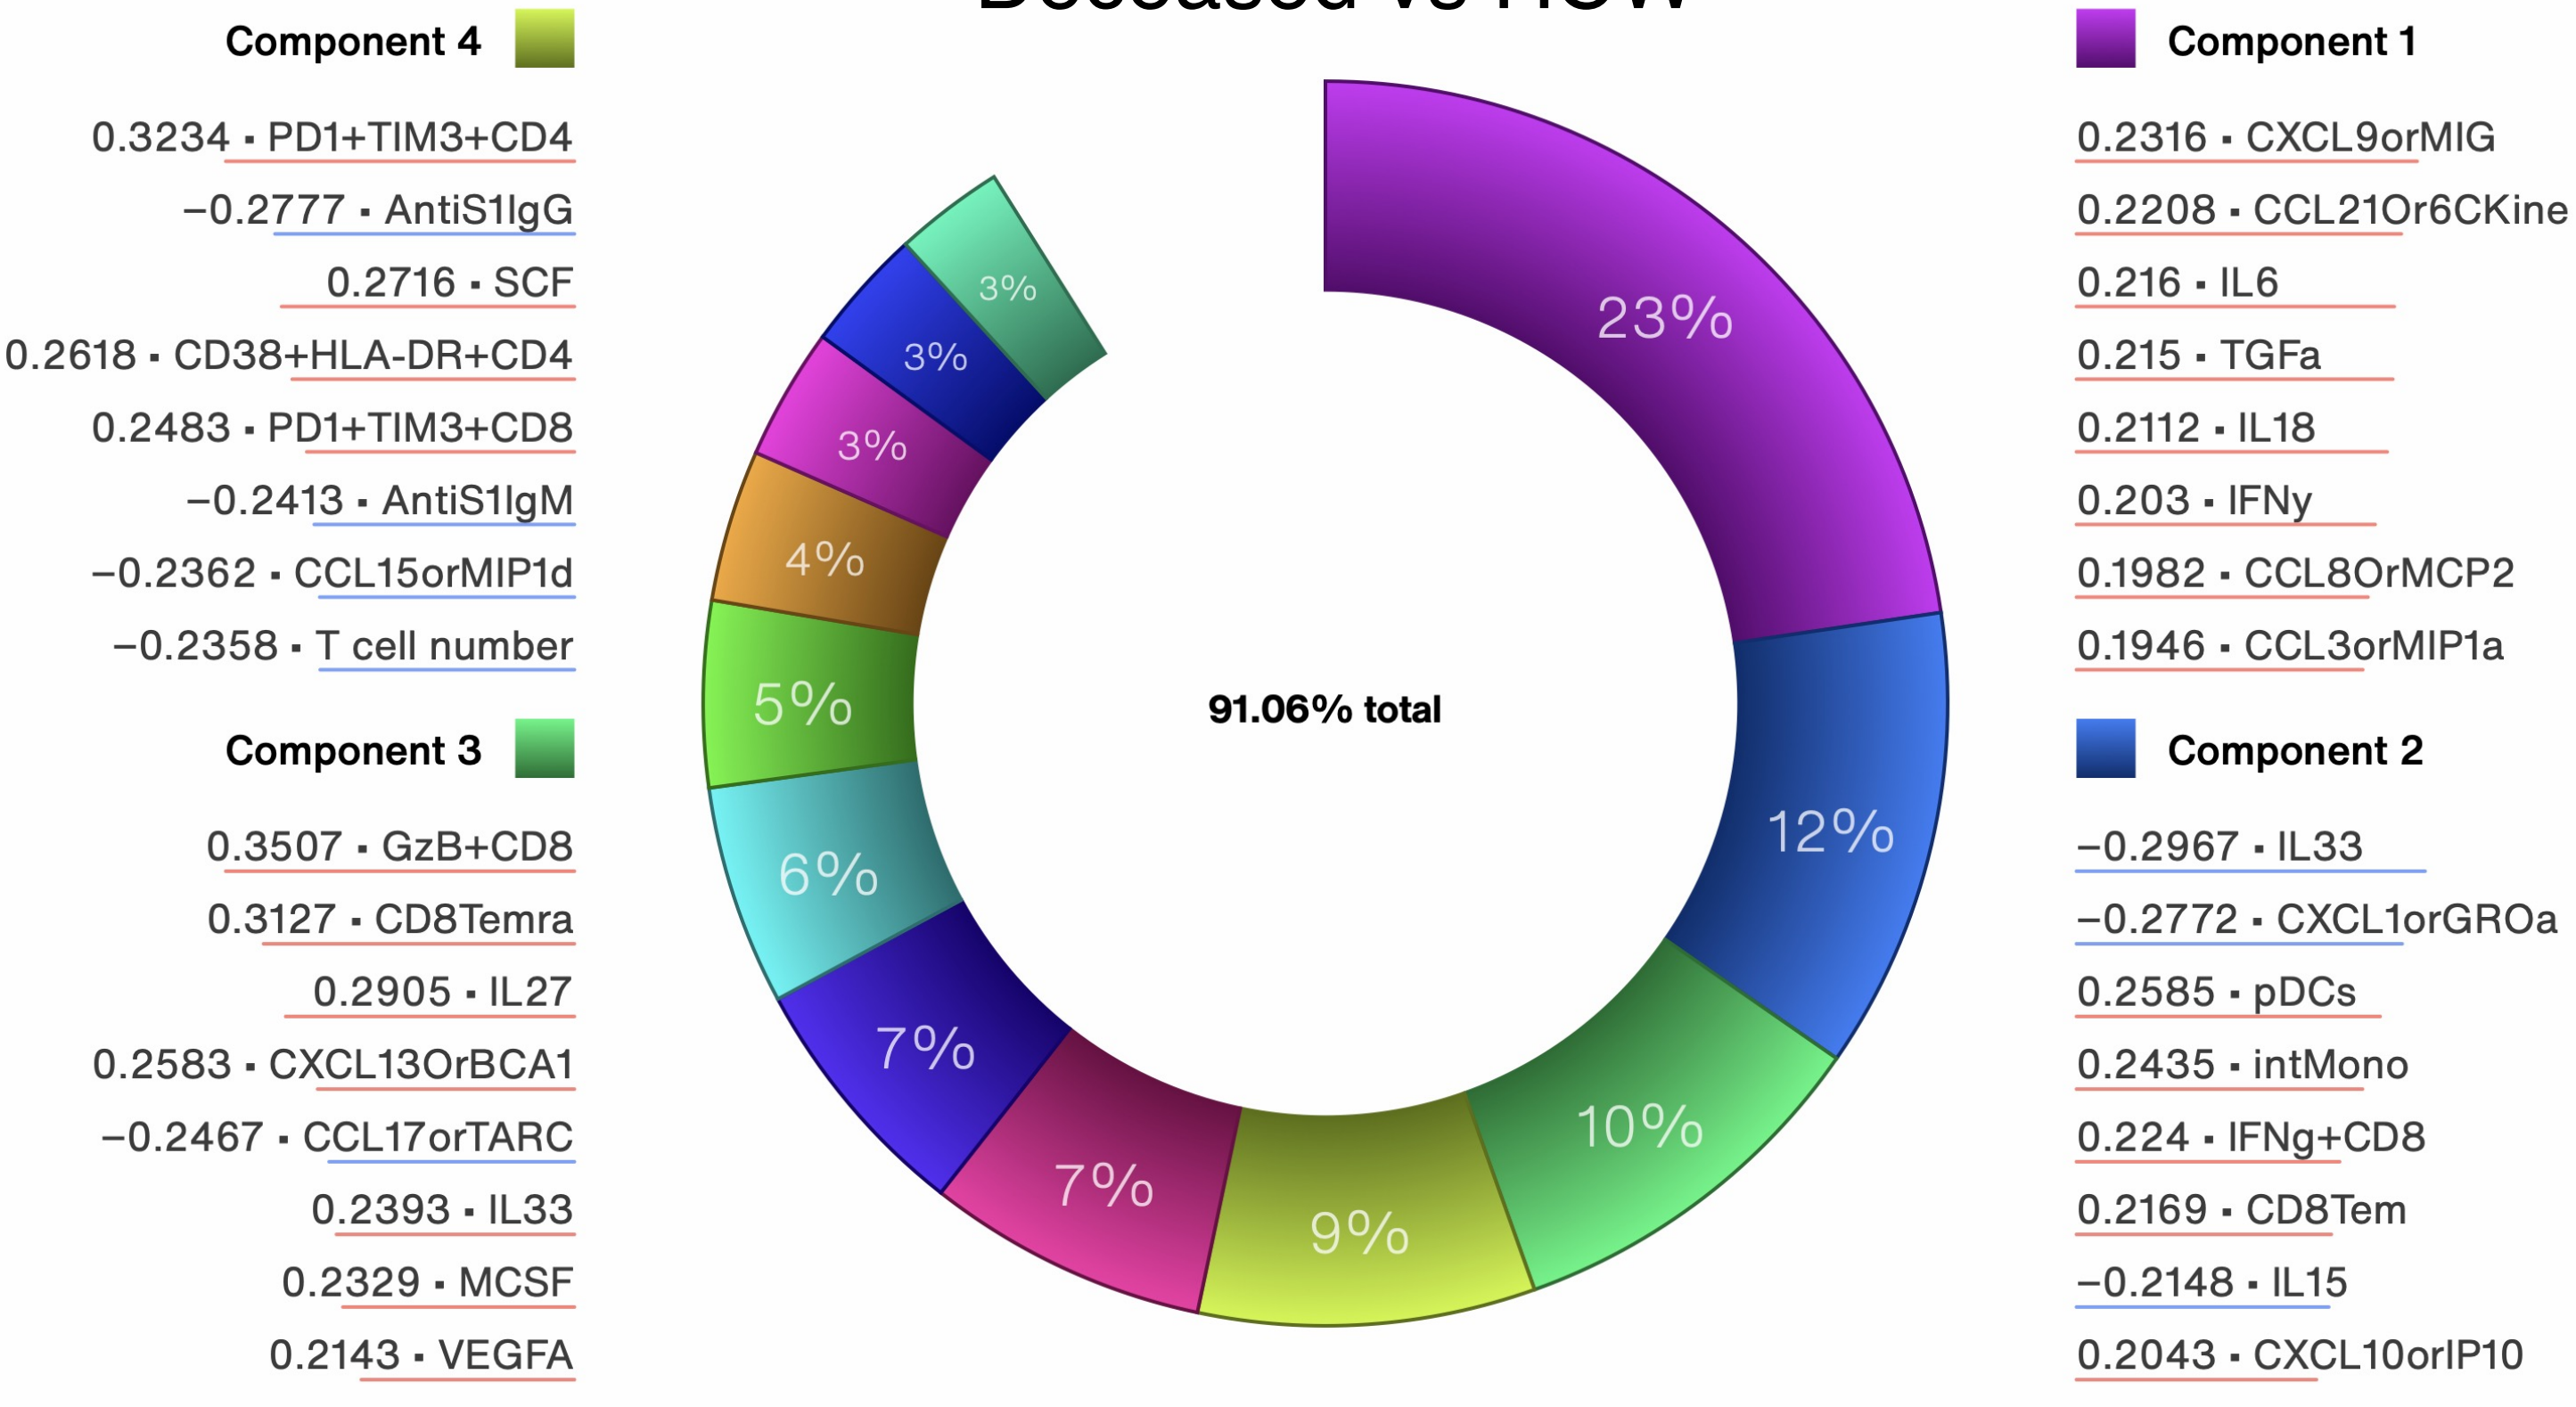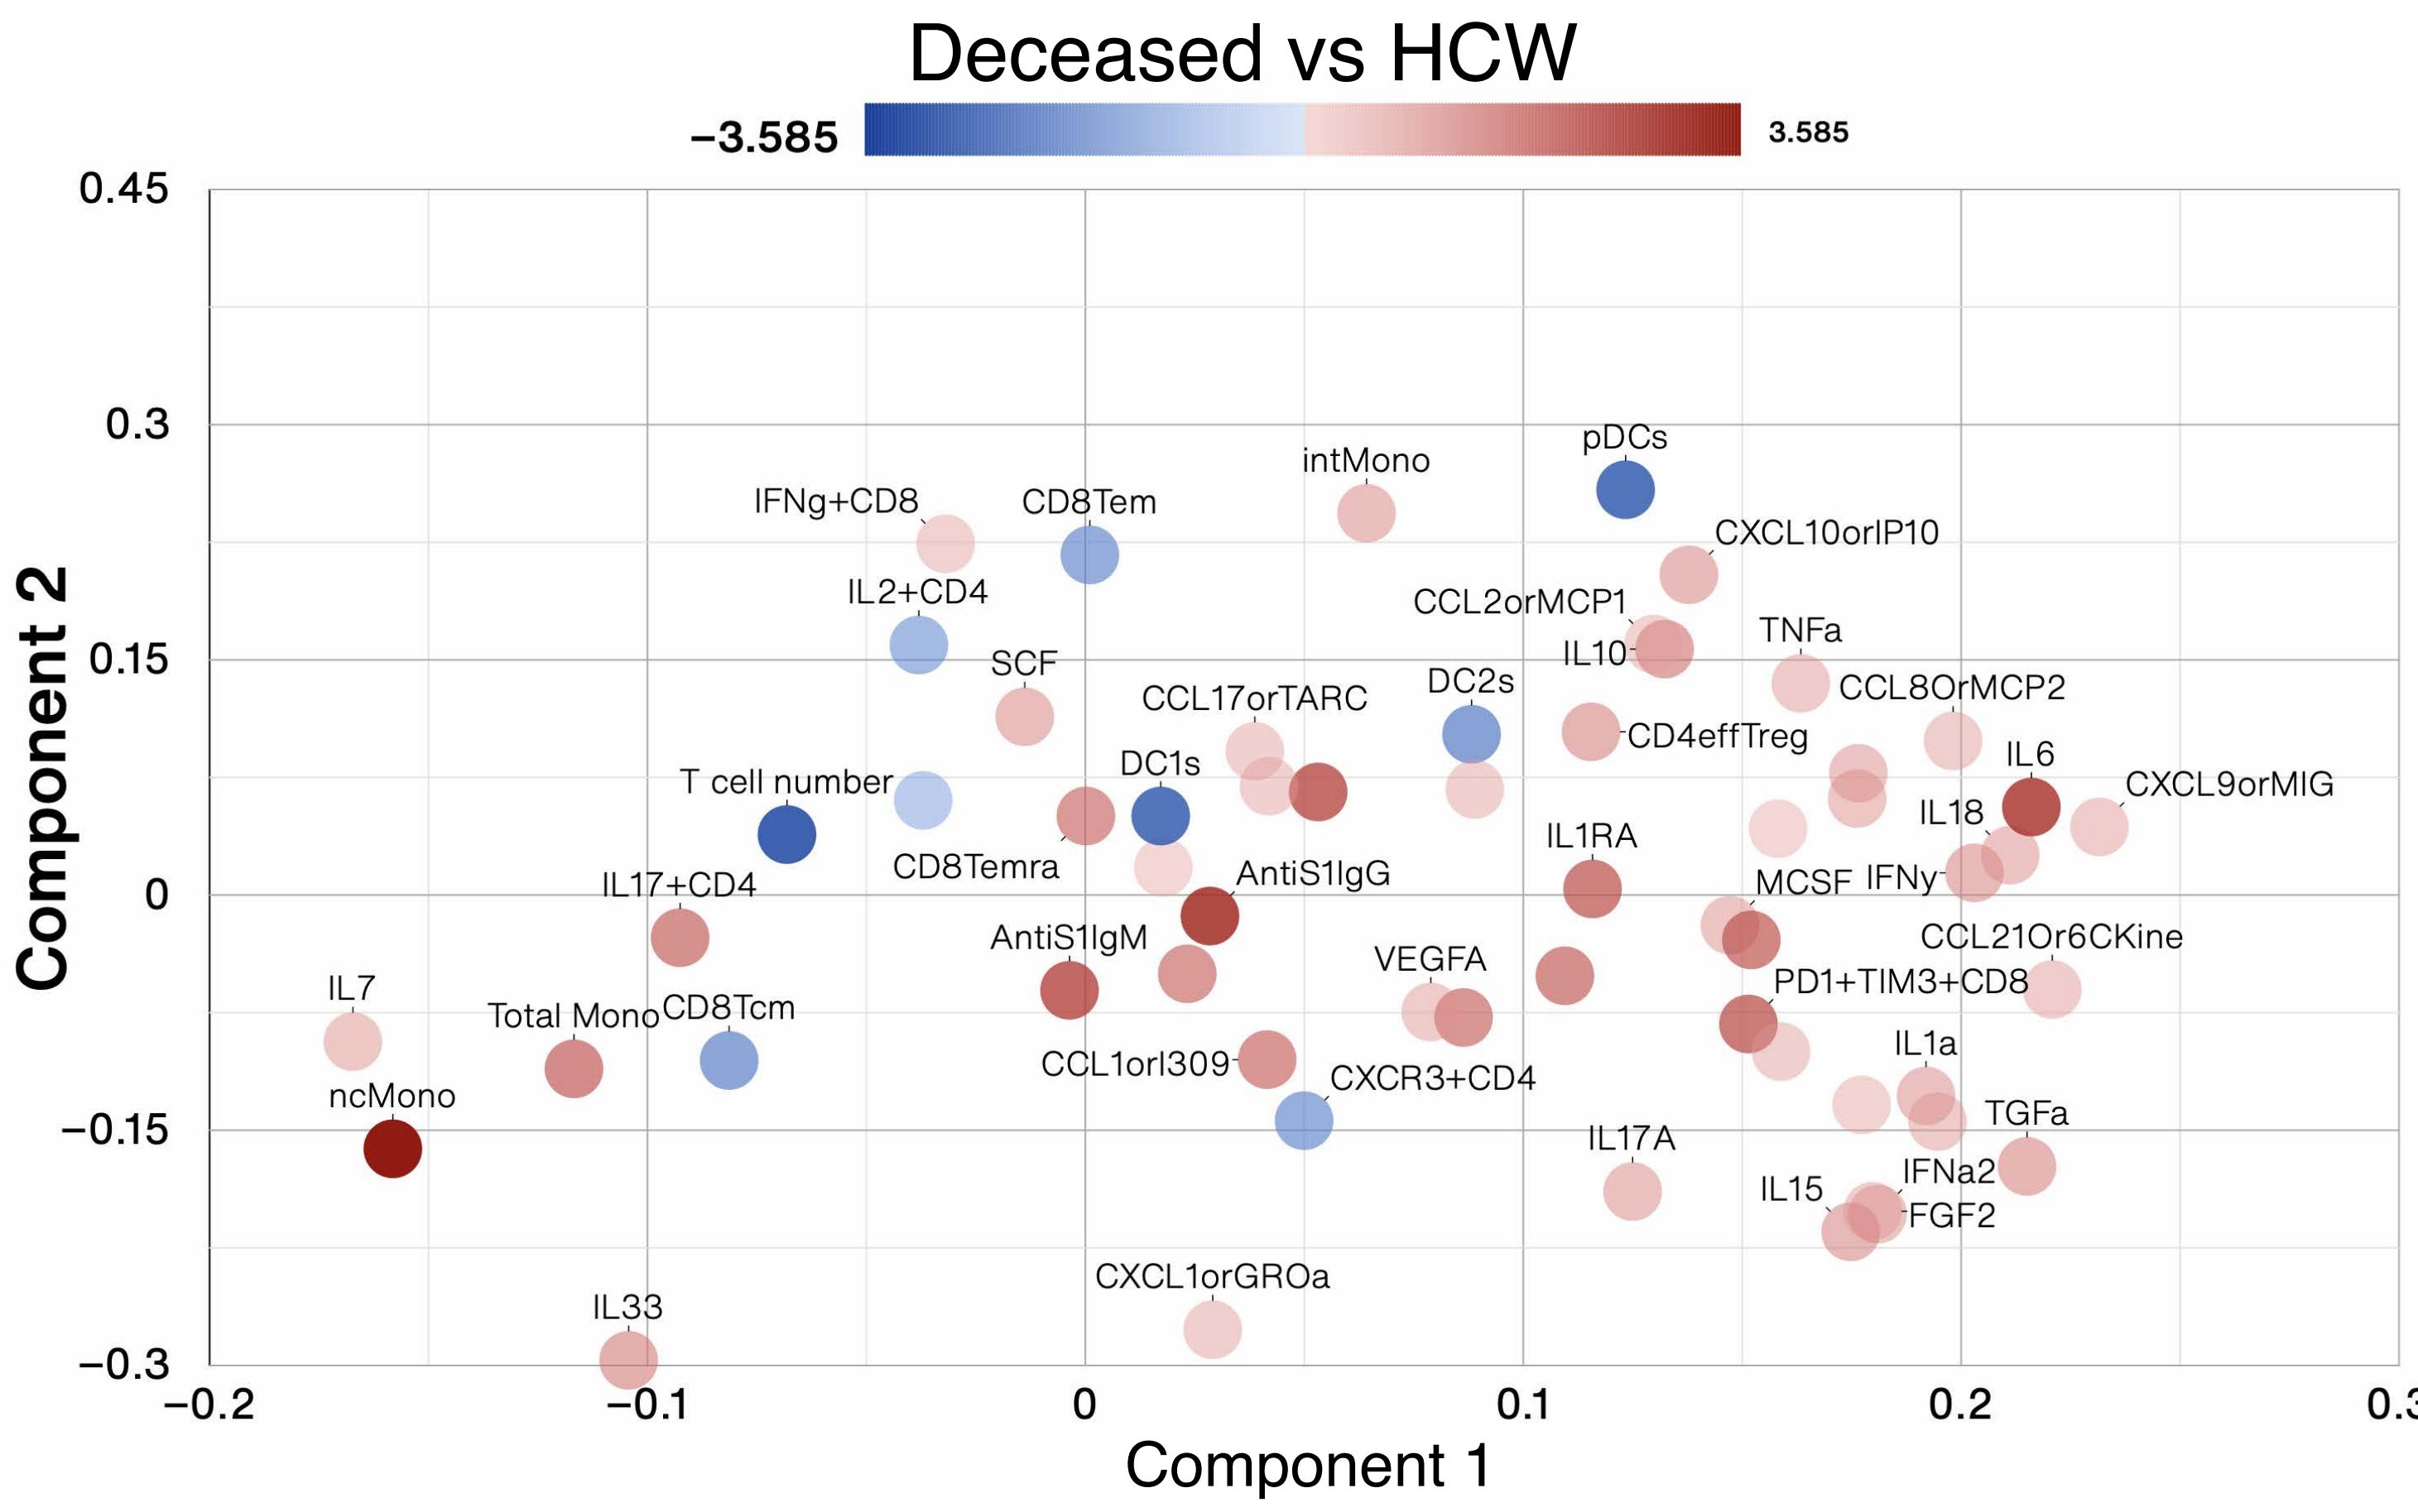

e.

Deceased vs Non-ICU

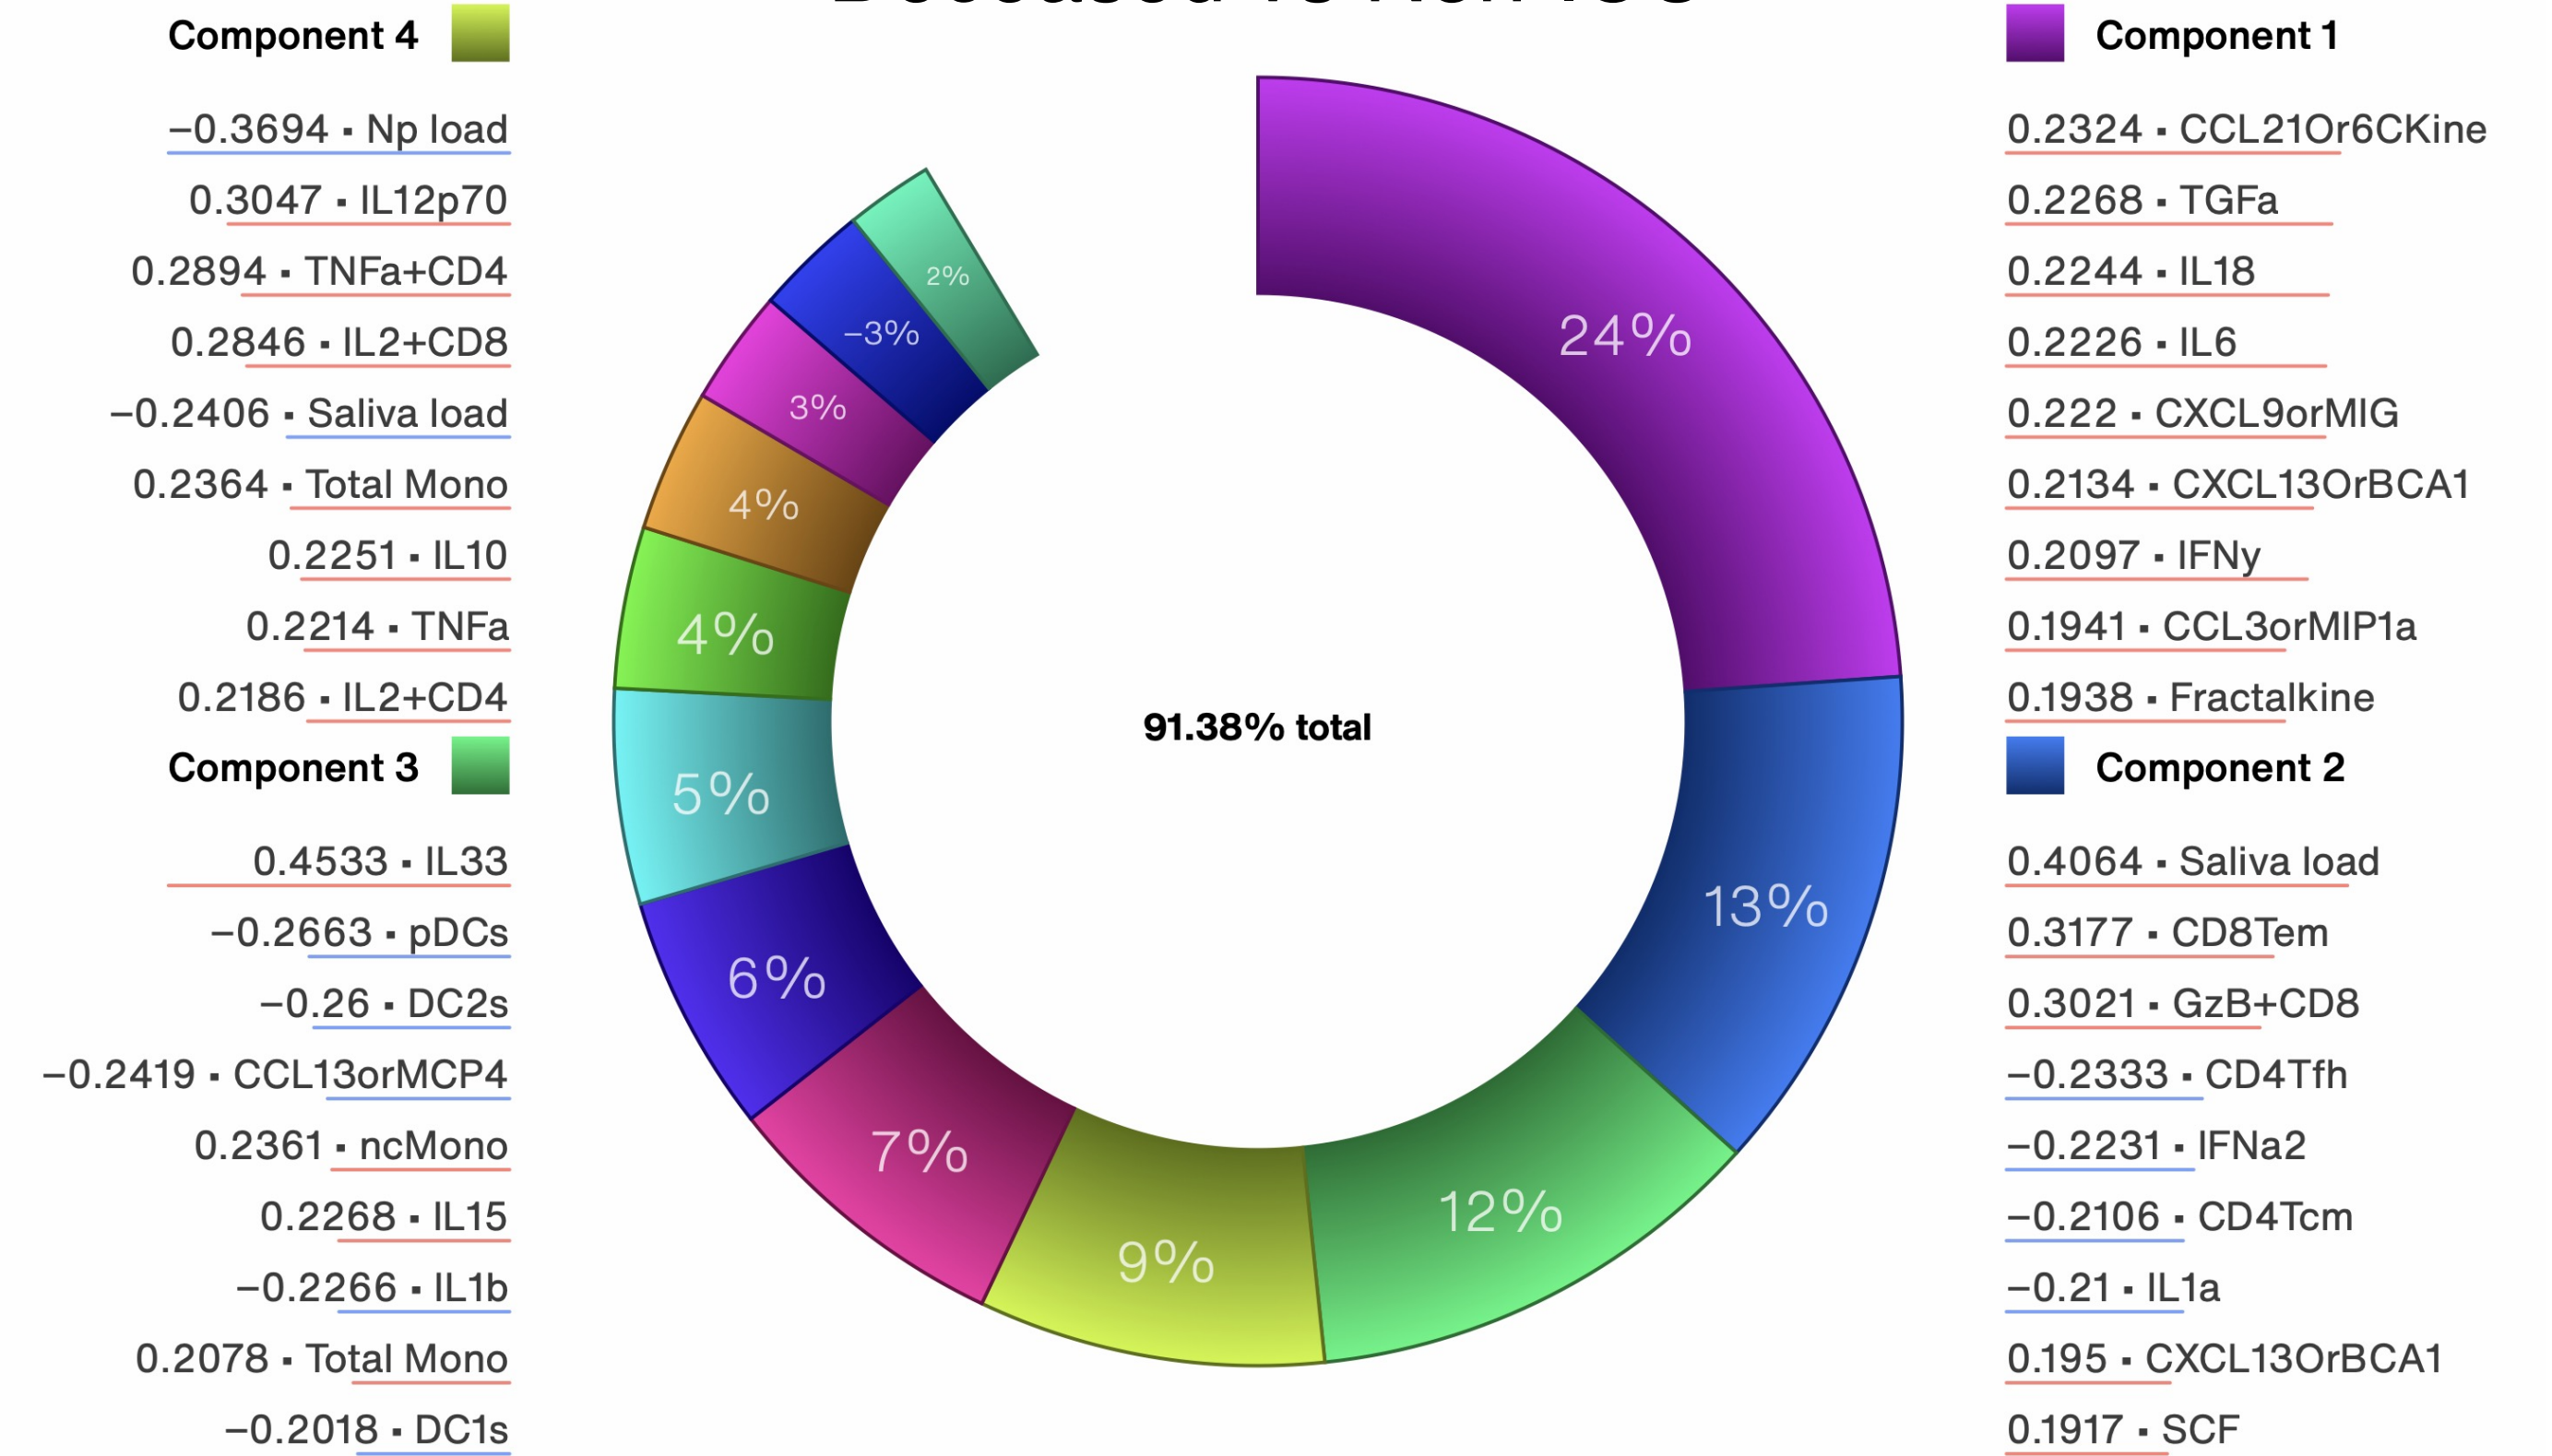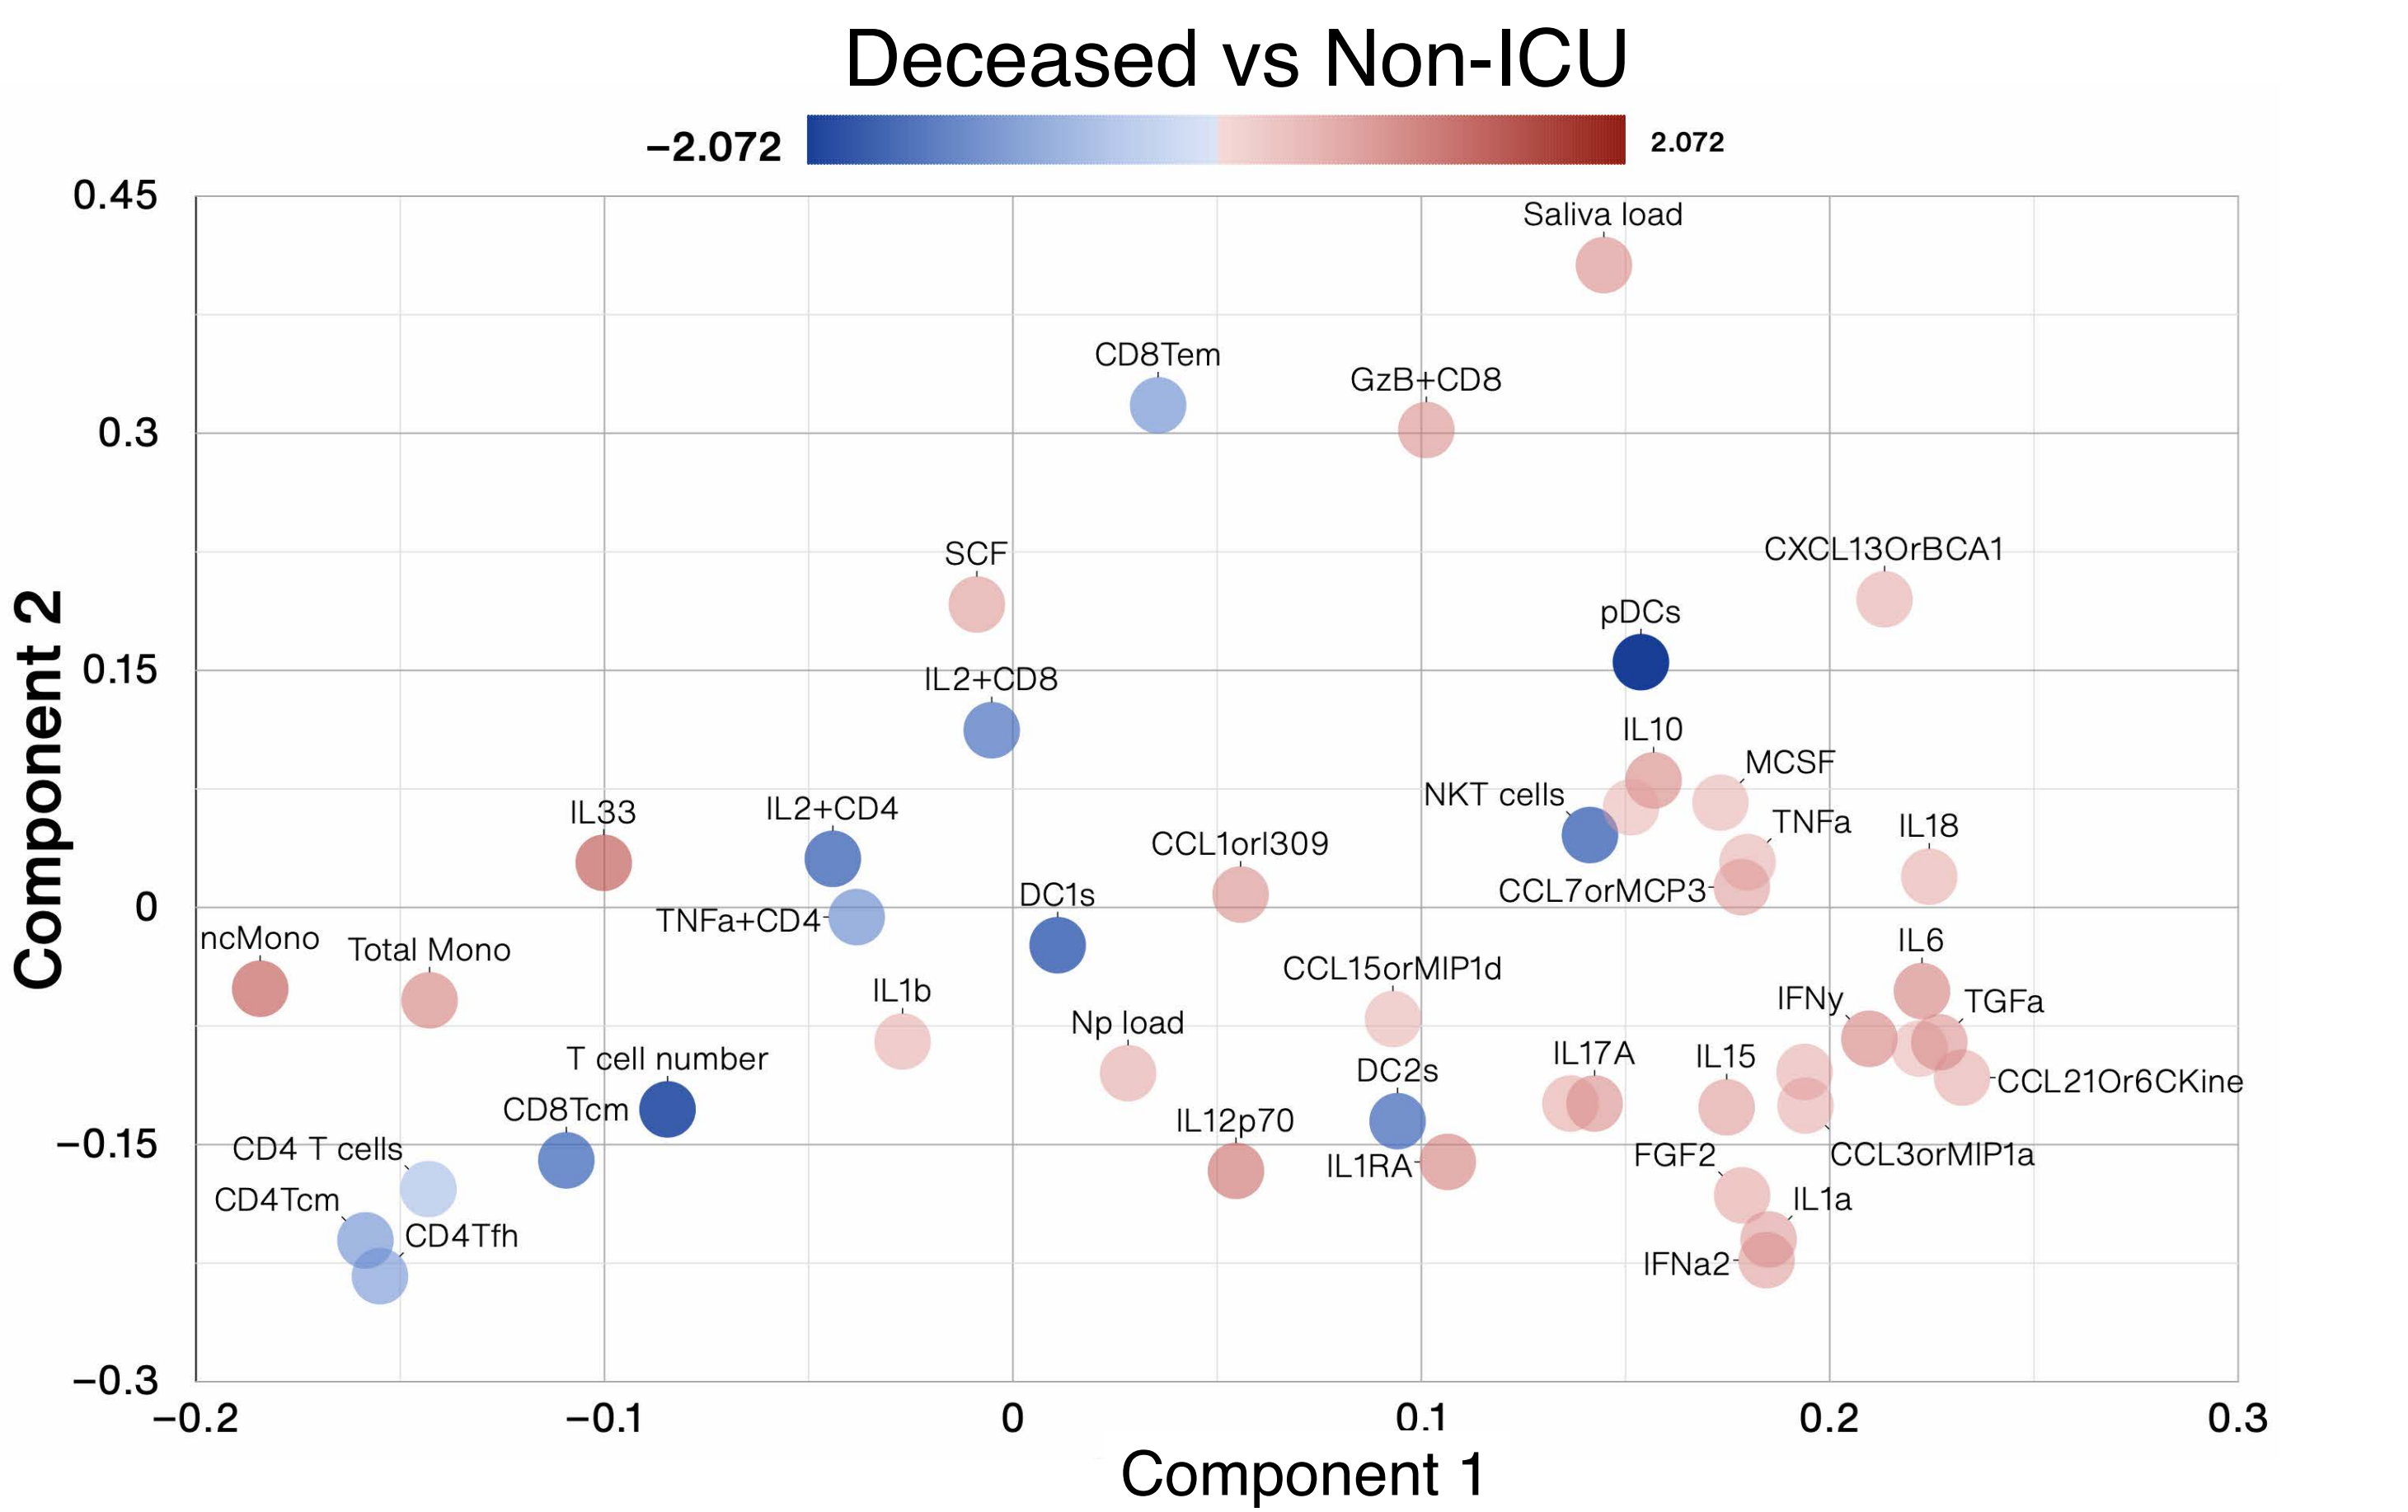



Fig. S2  
f.

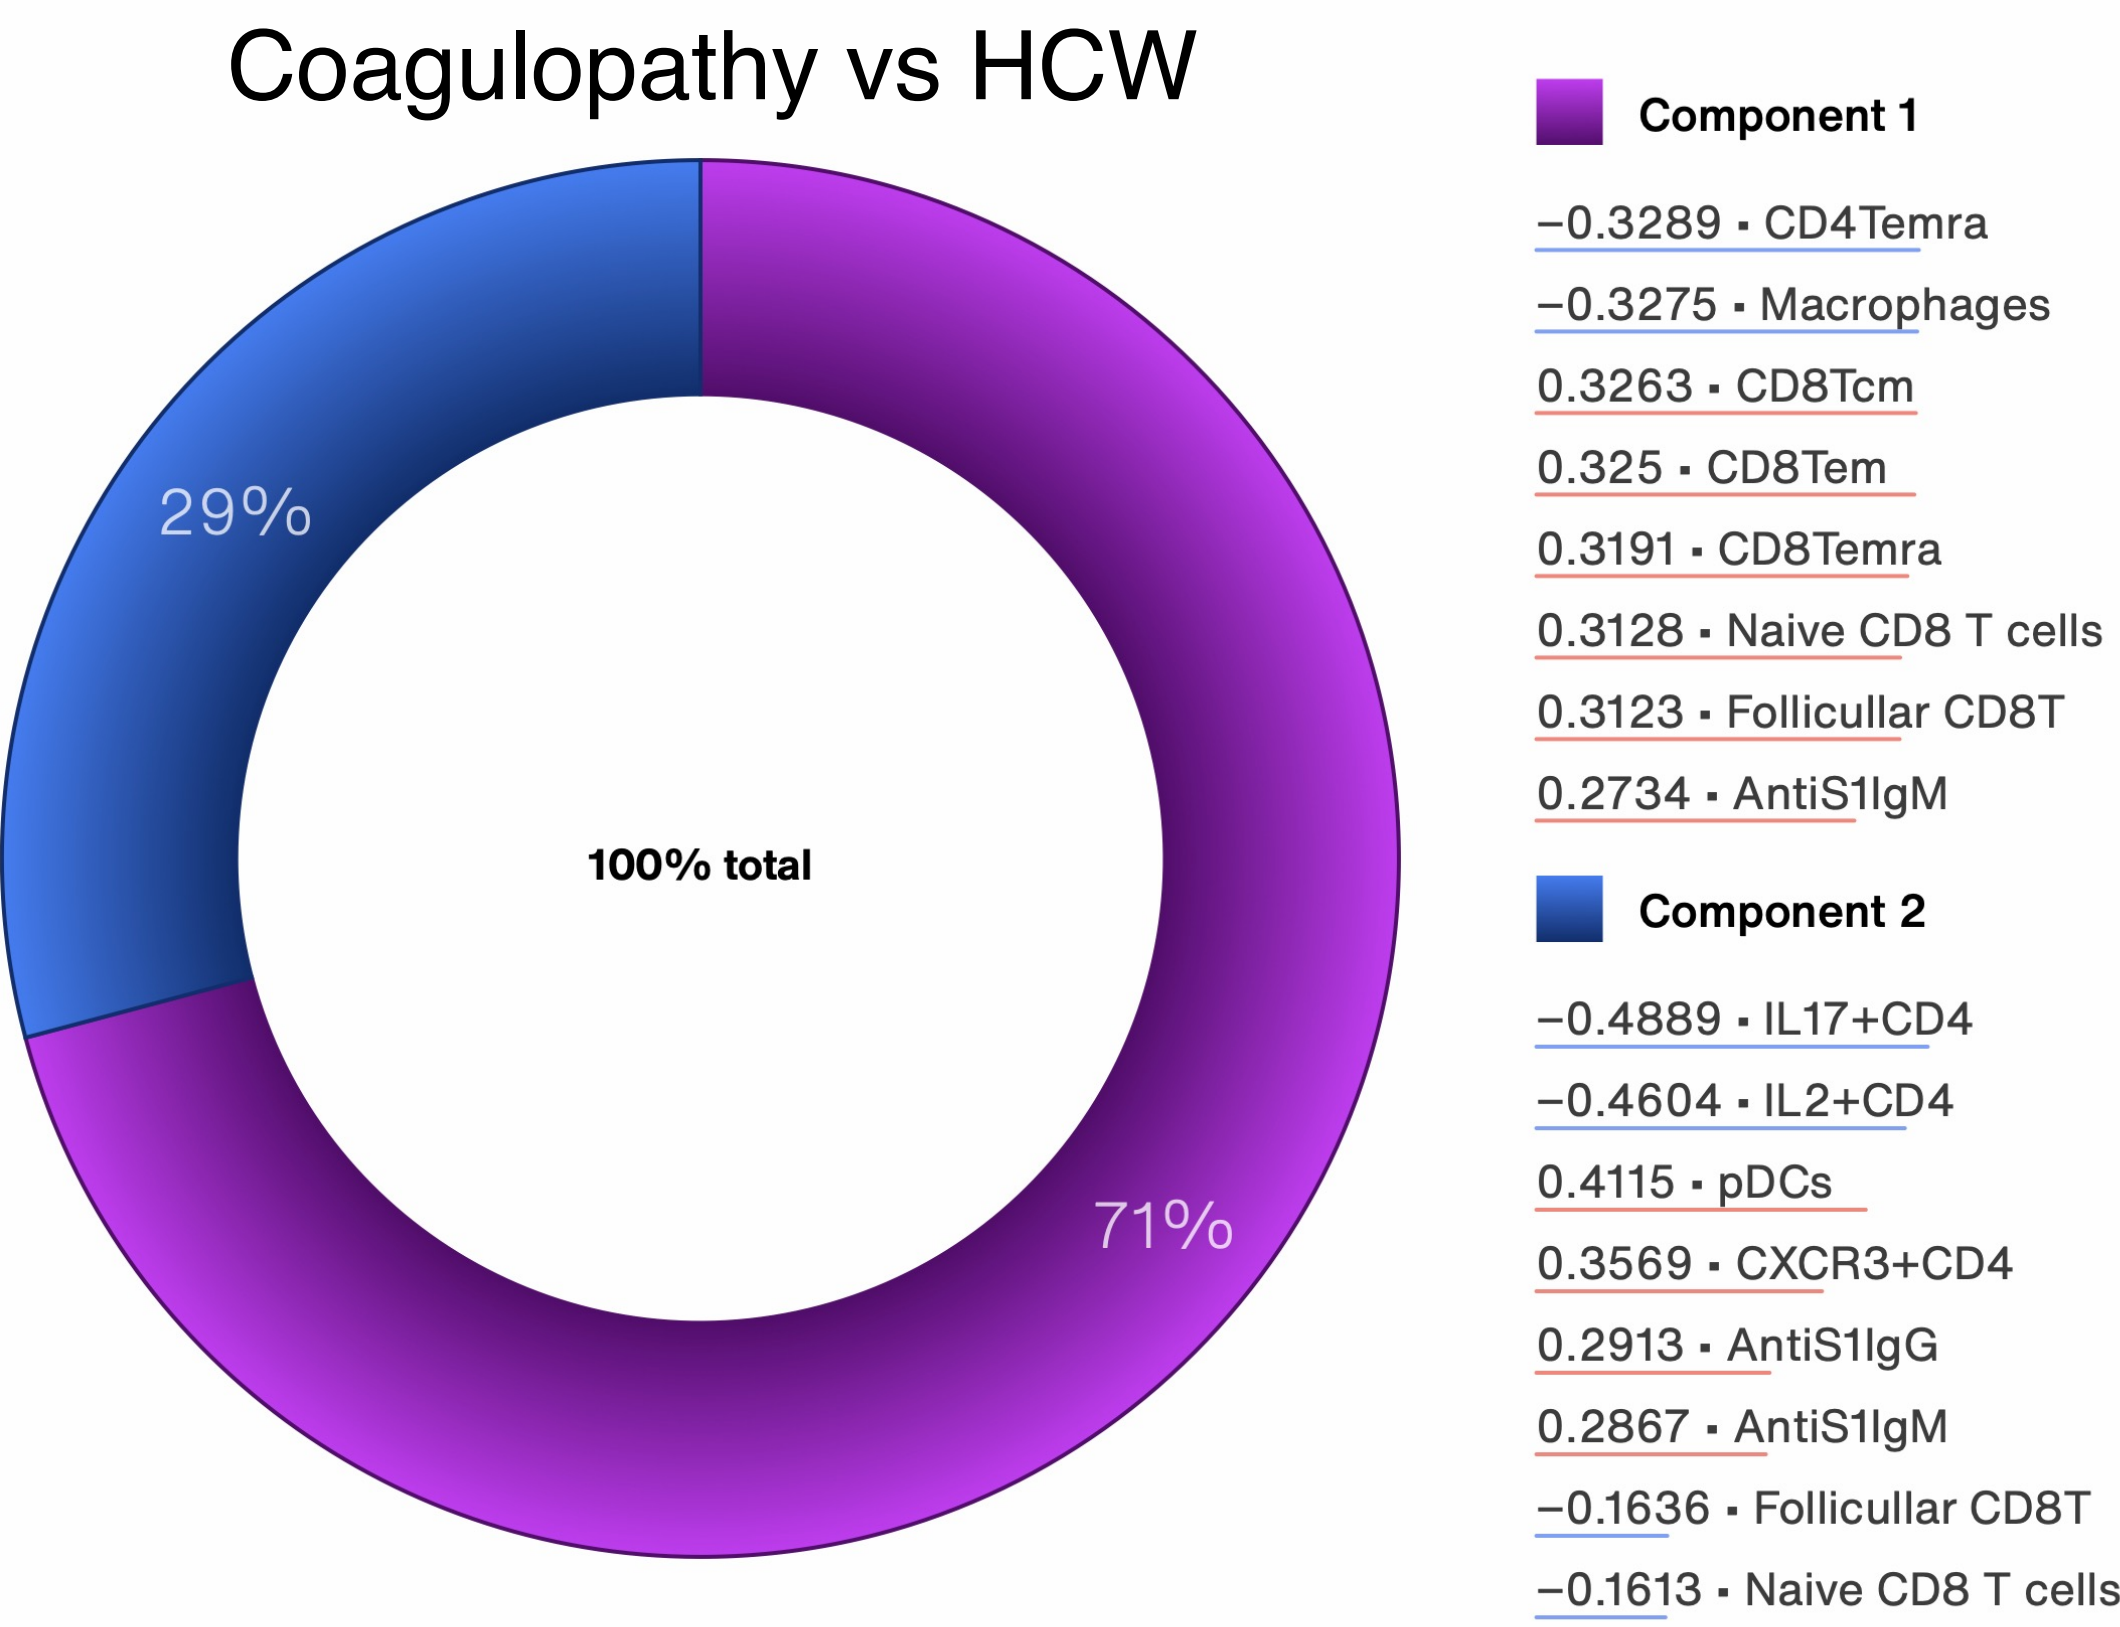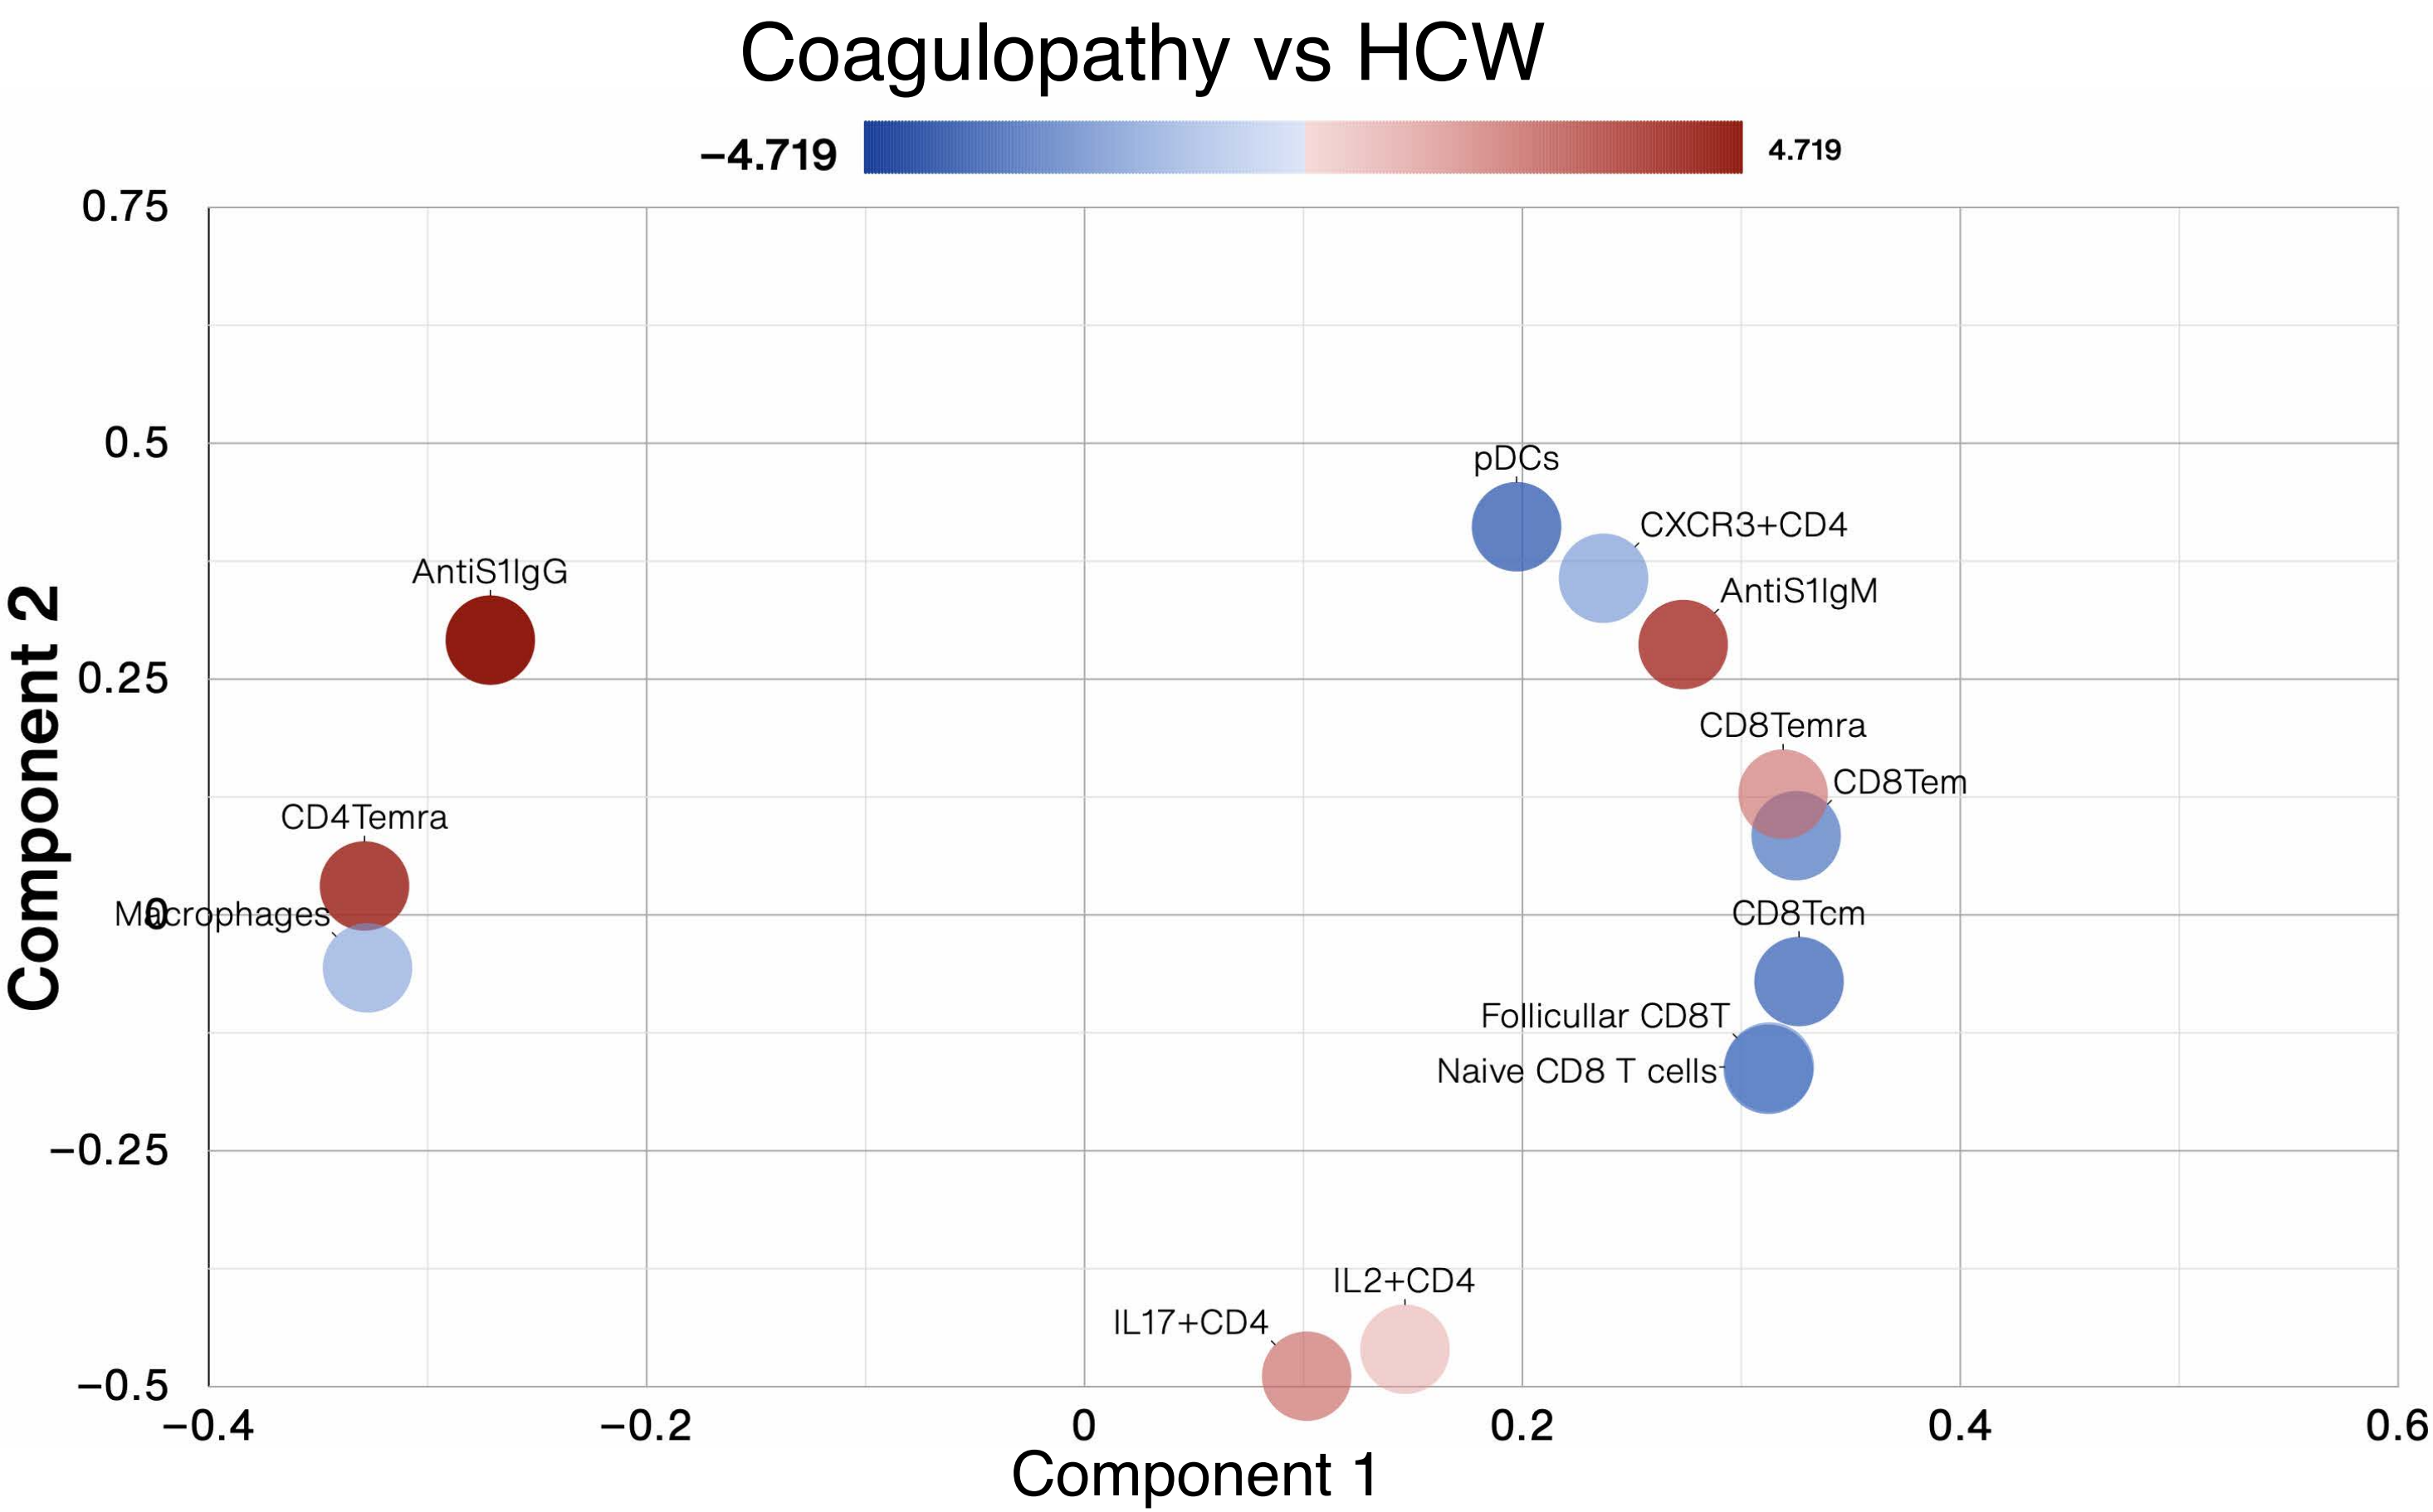

g.

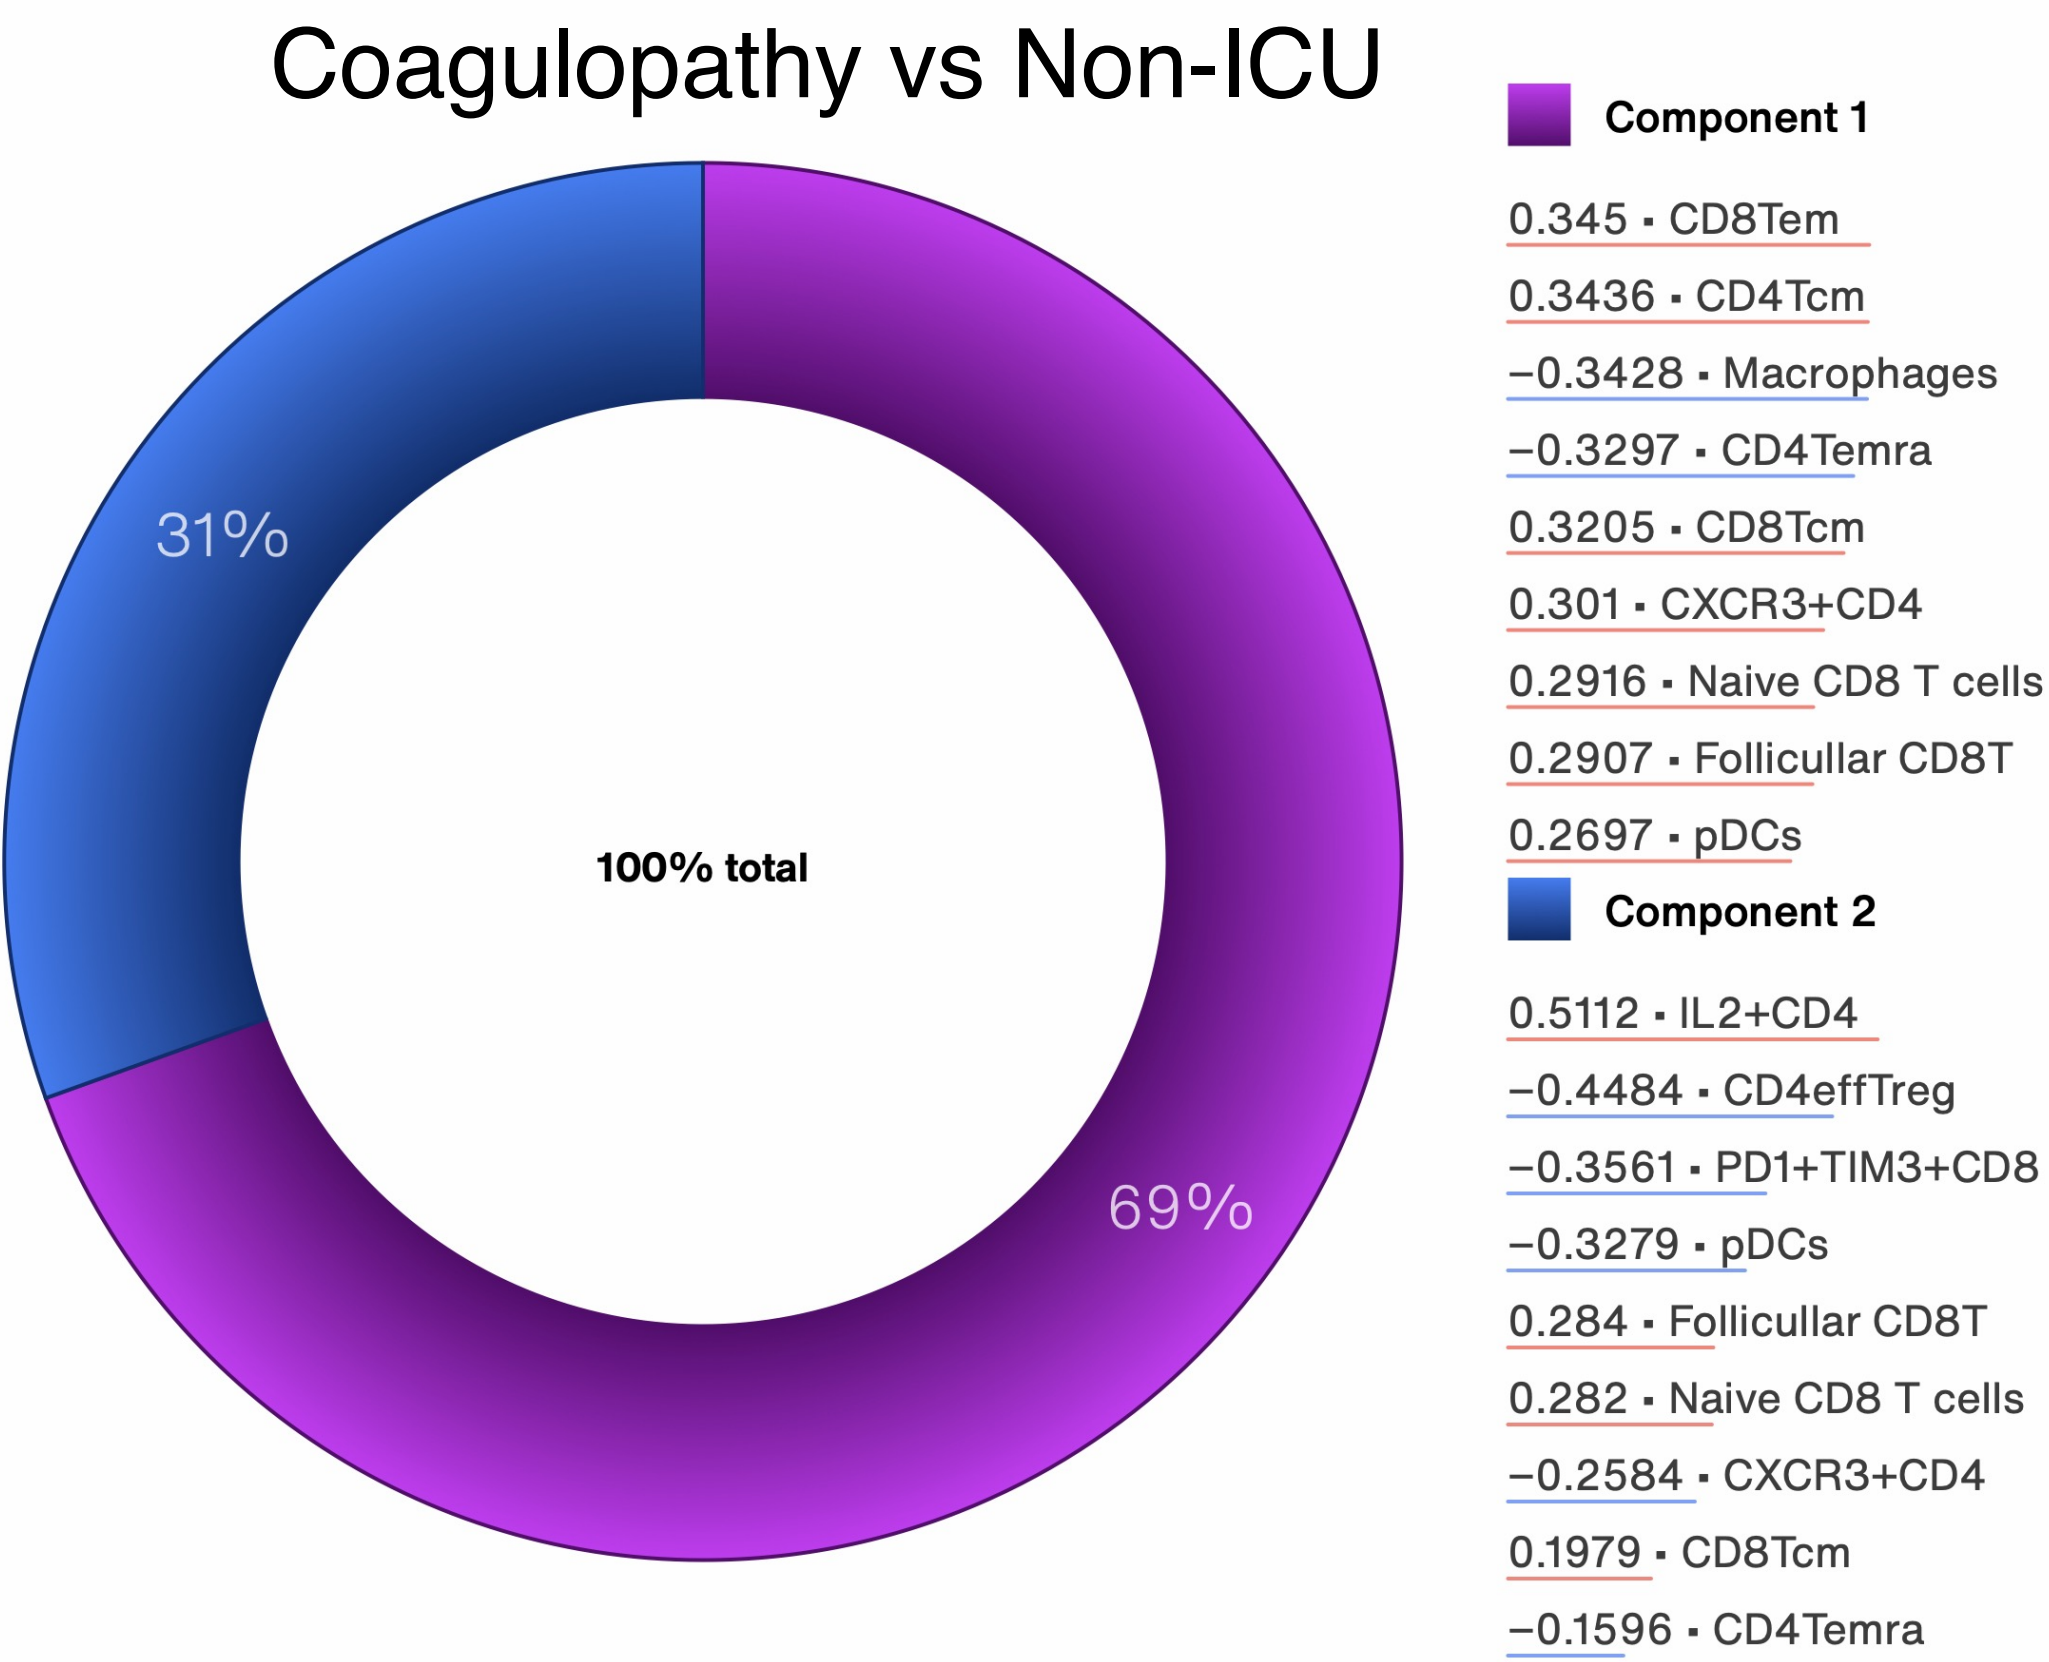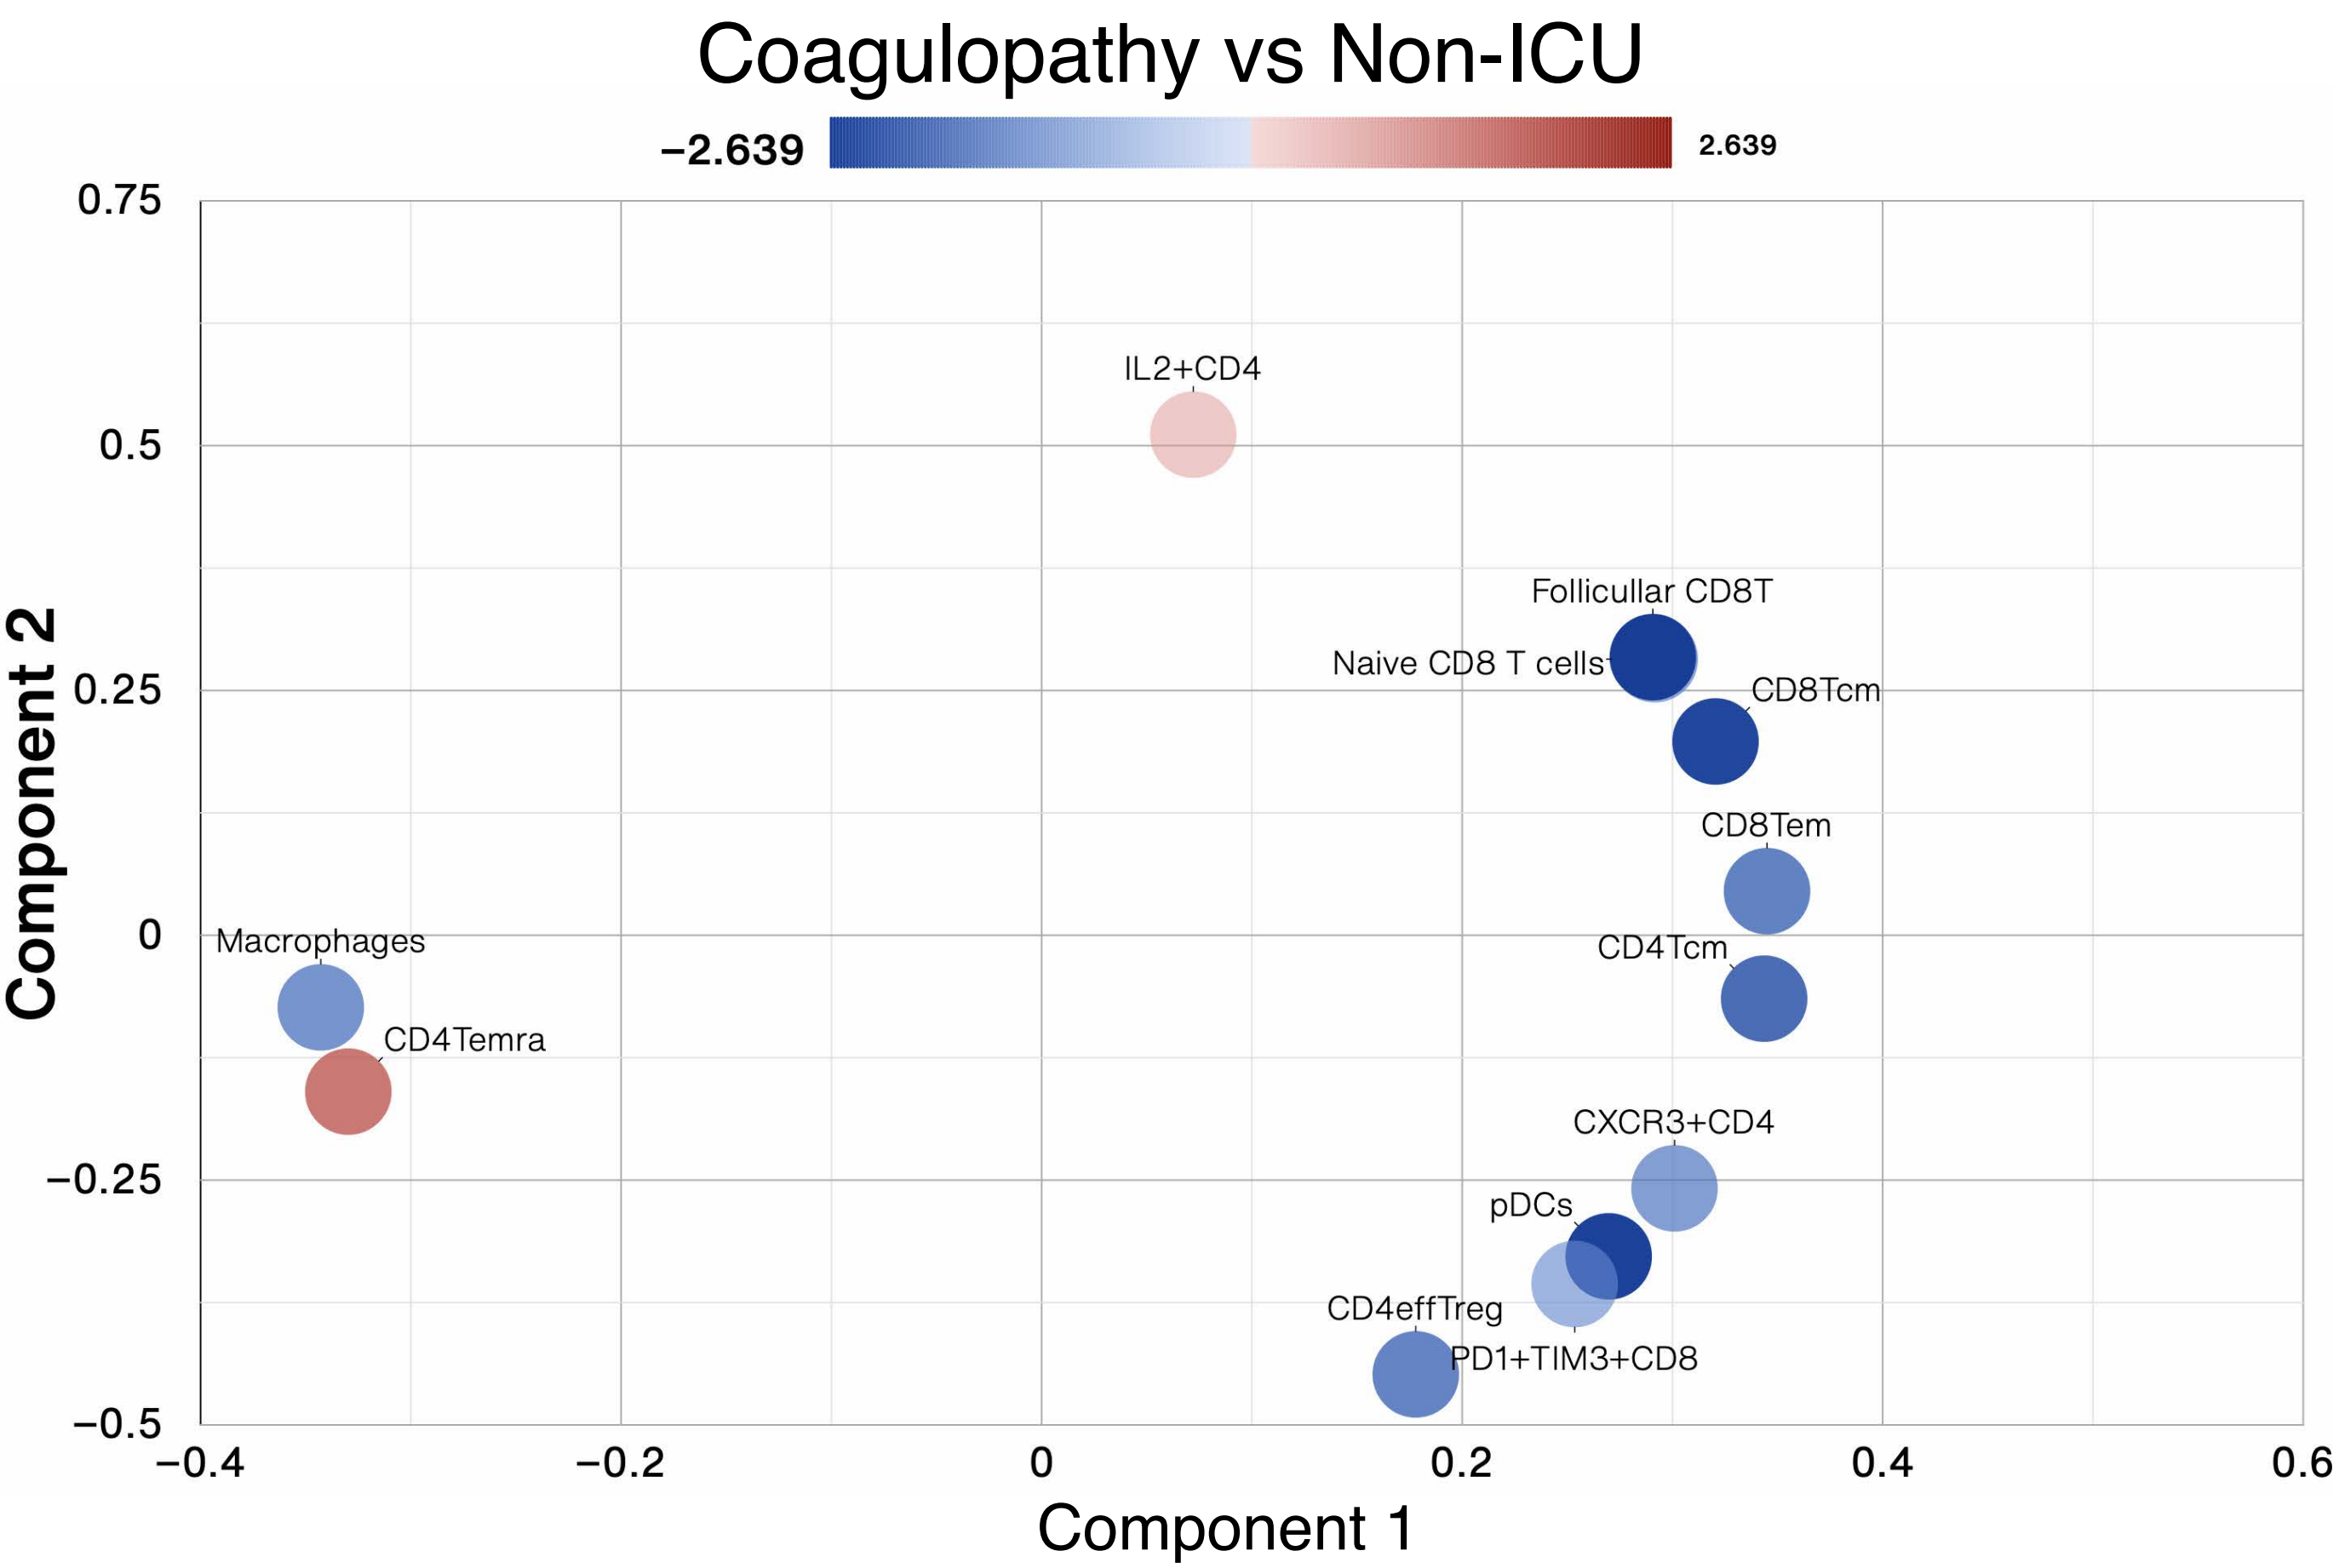



Fig.S3

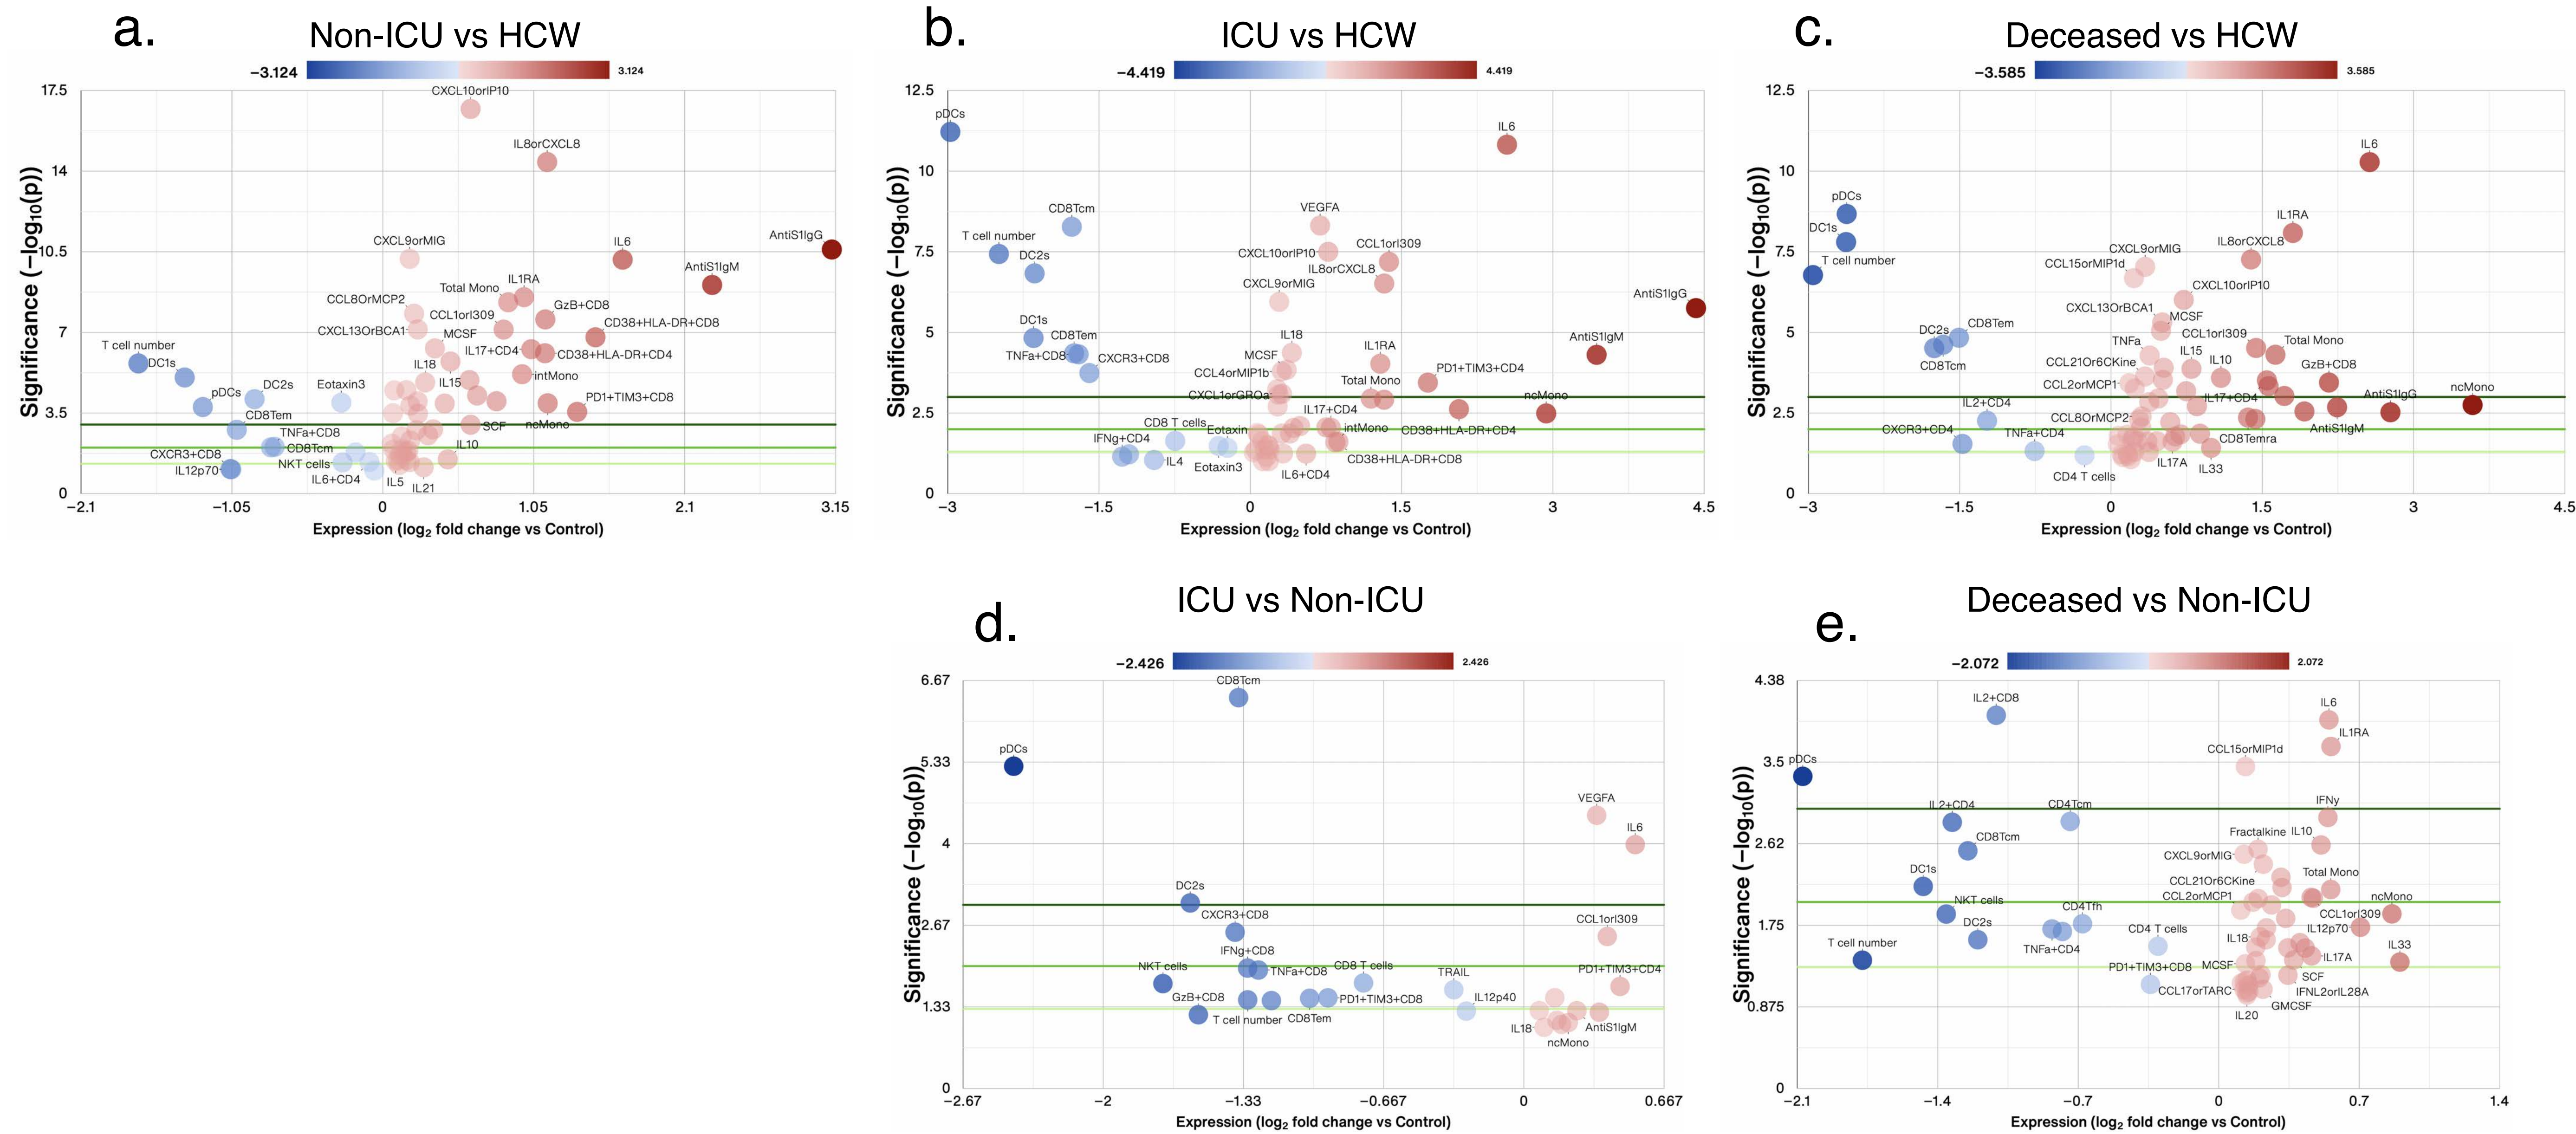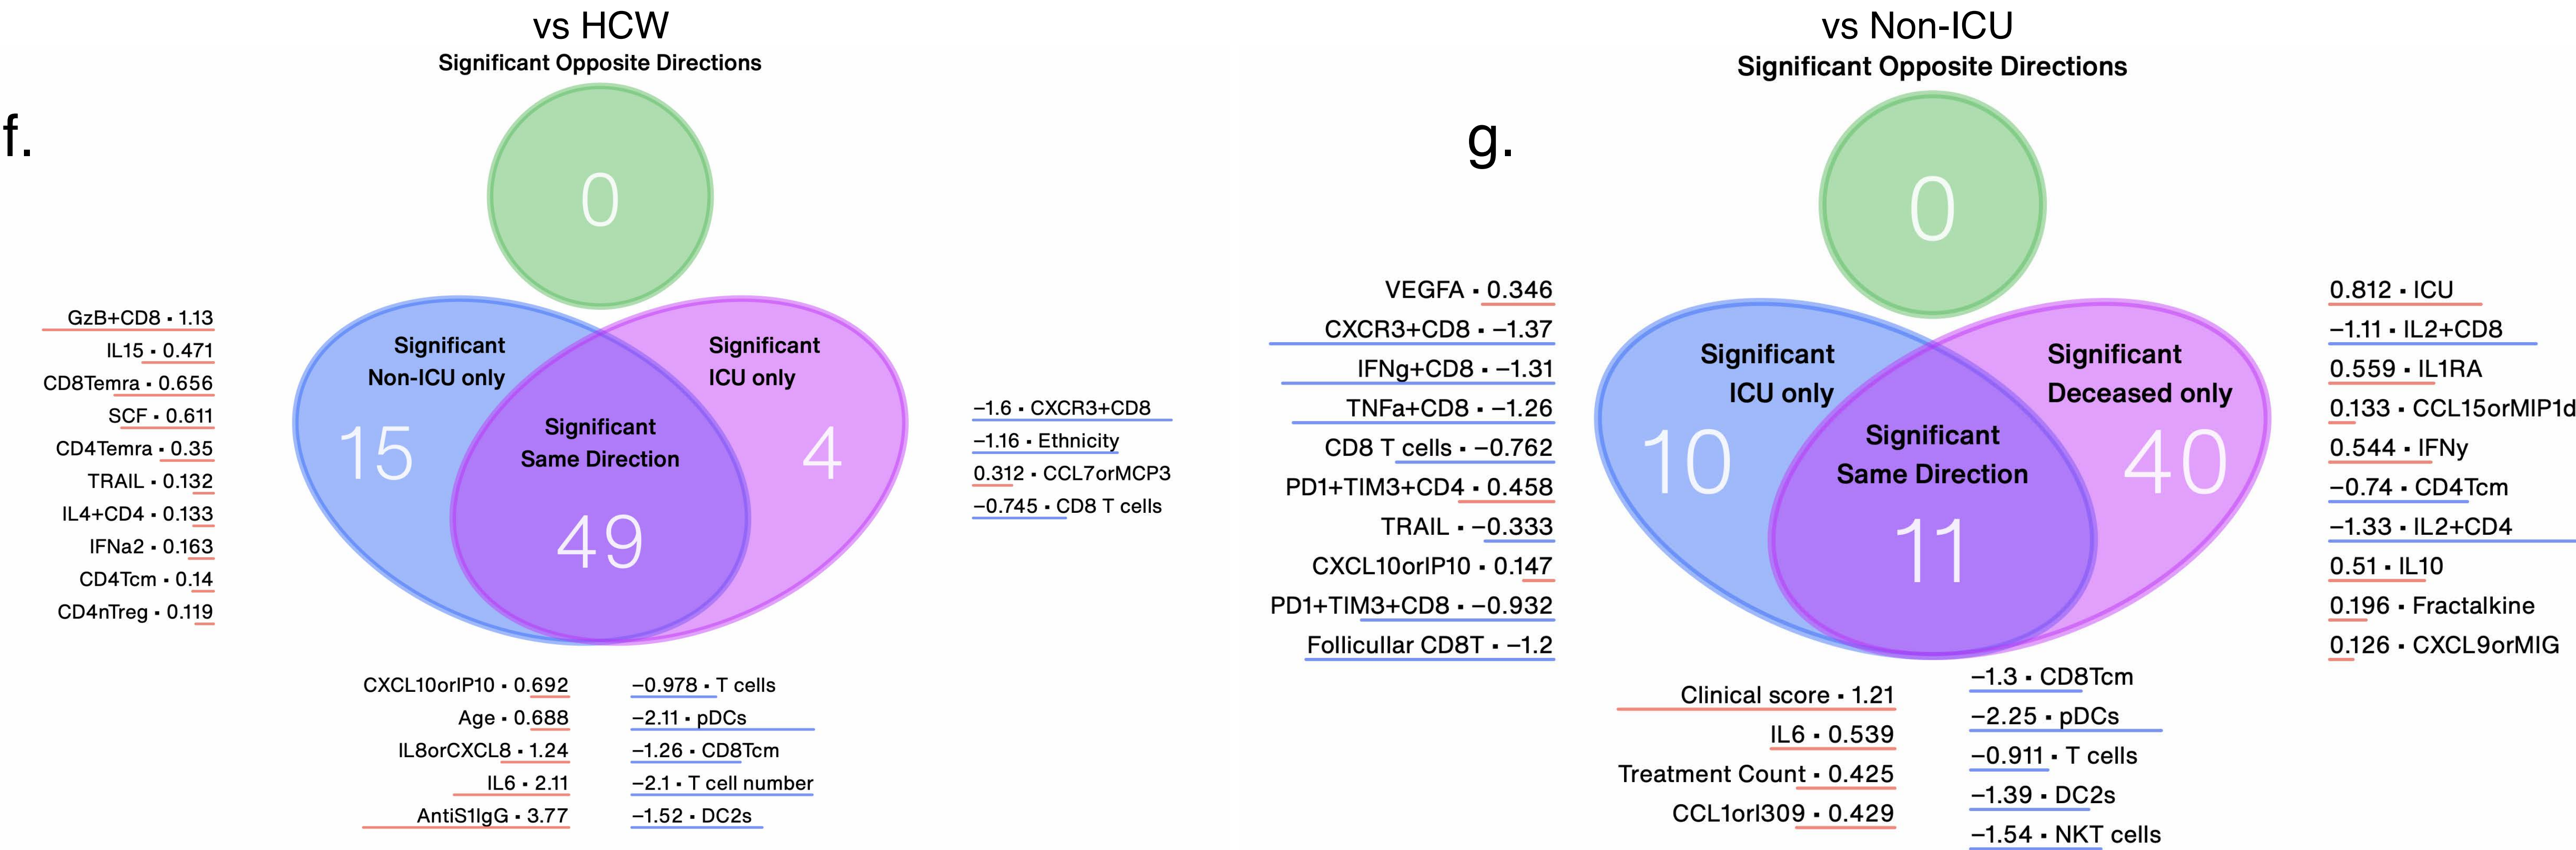



Fig.S4

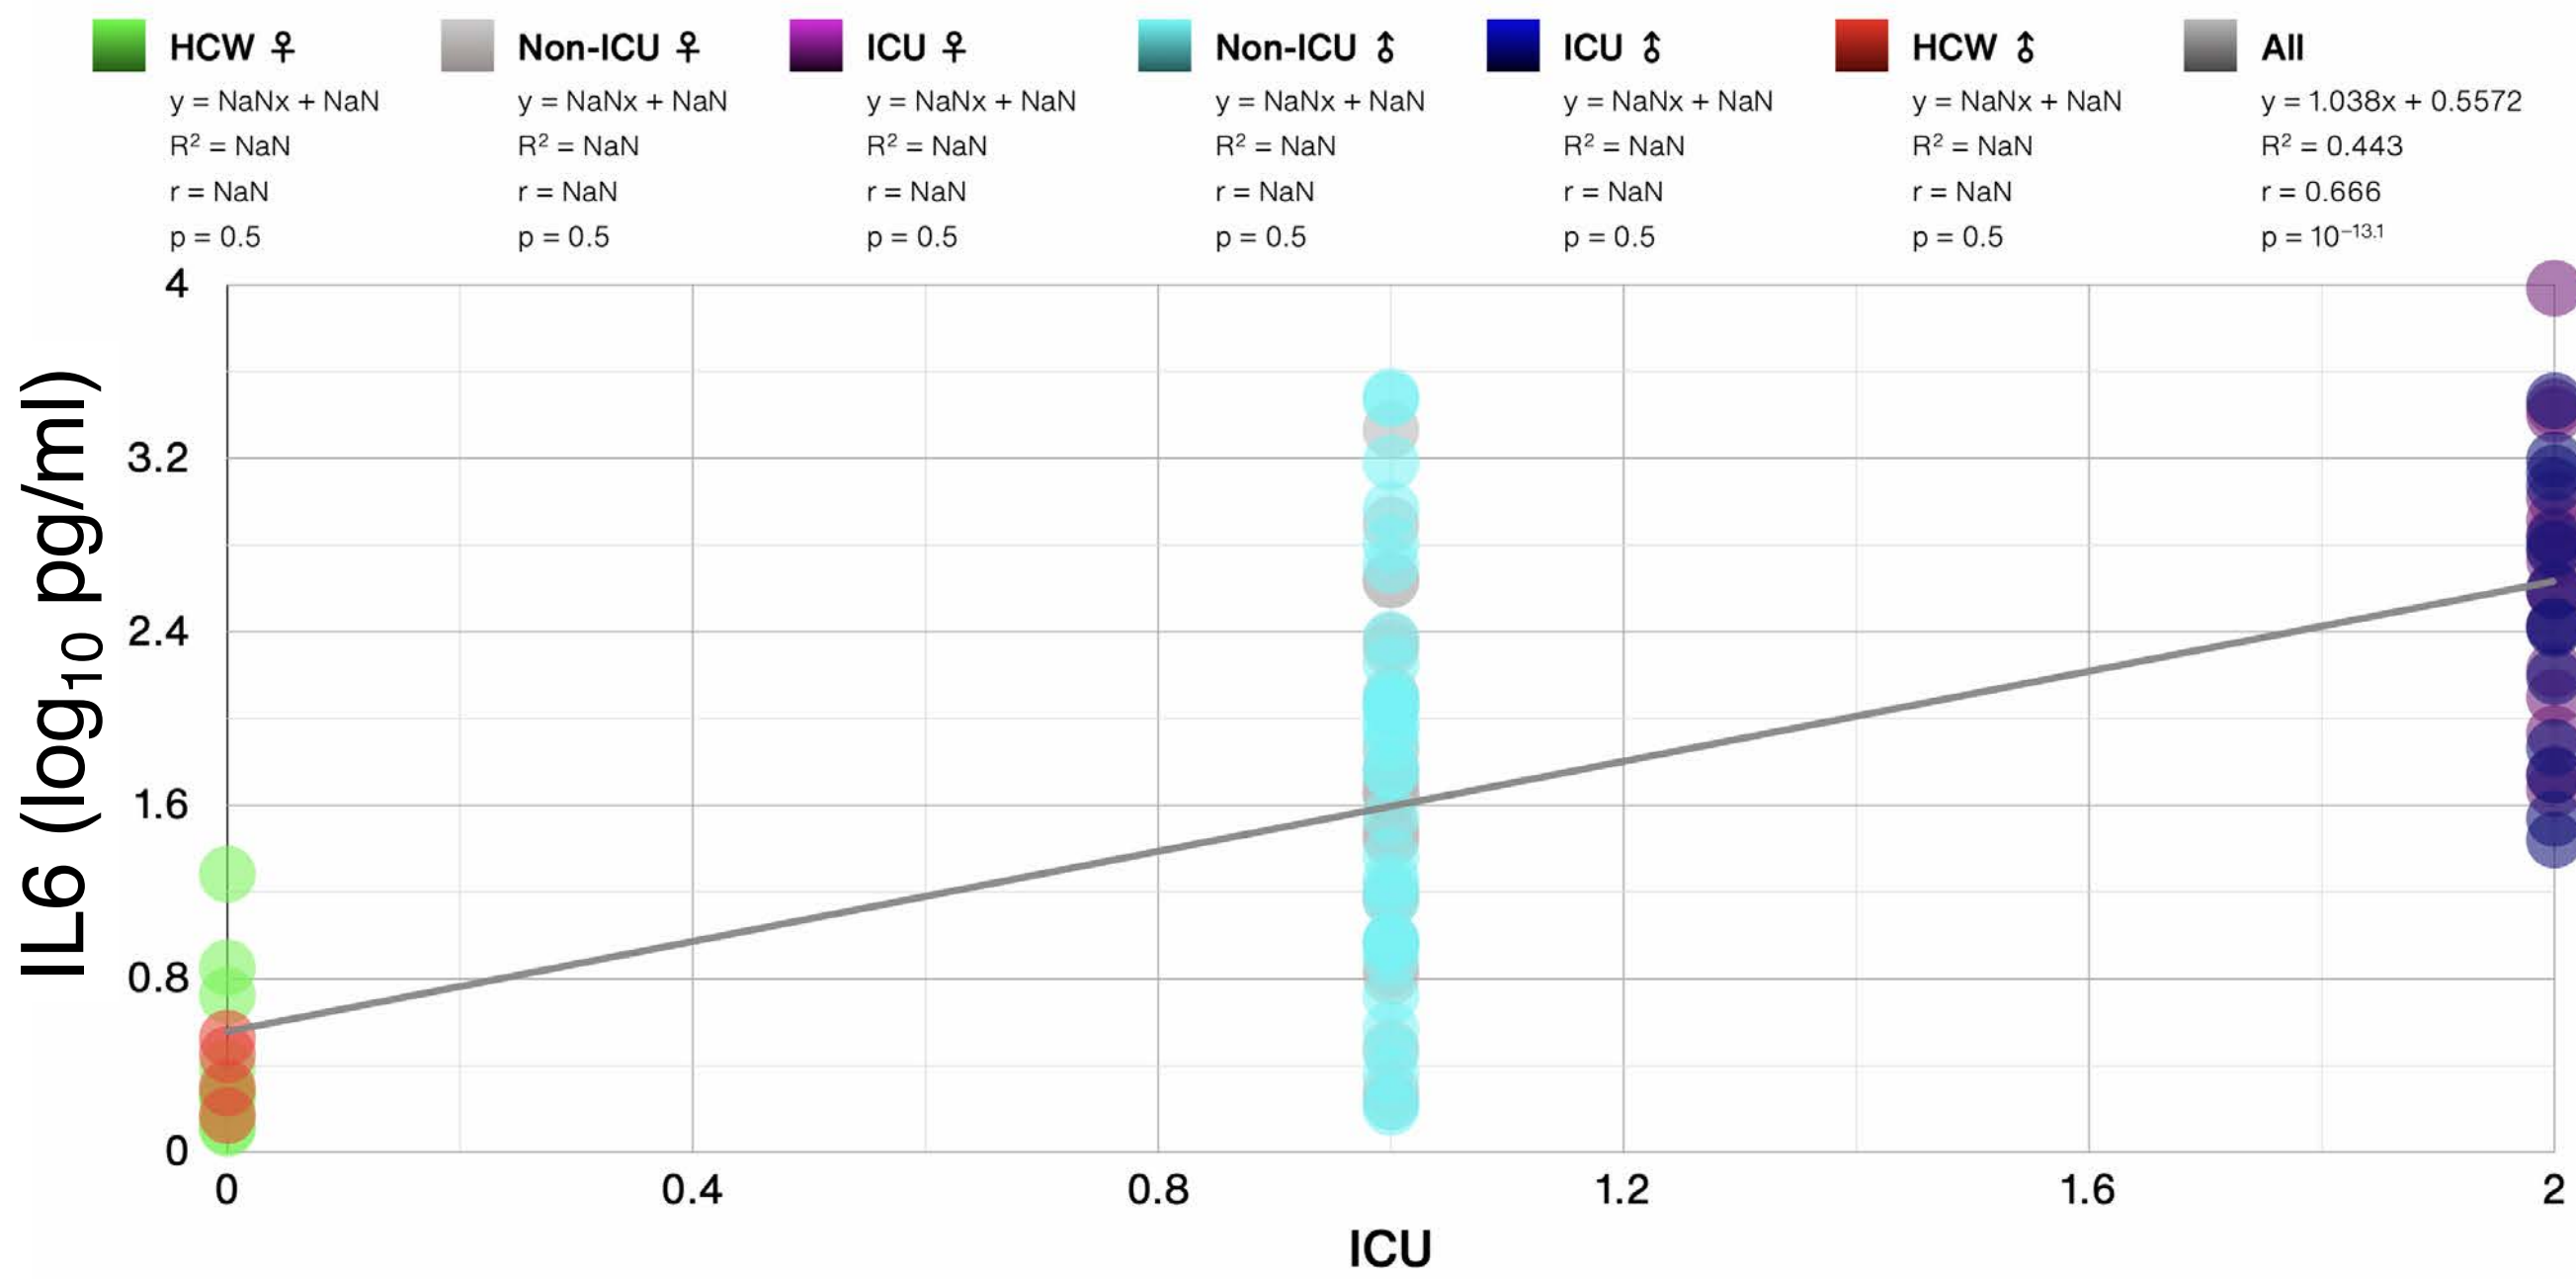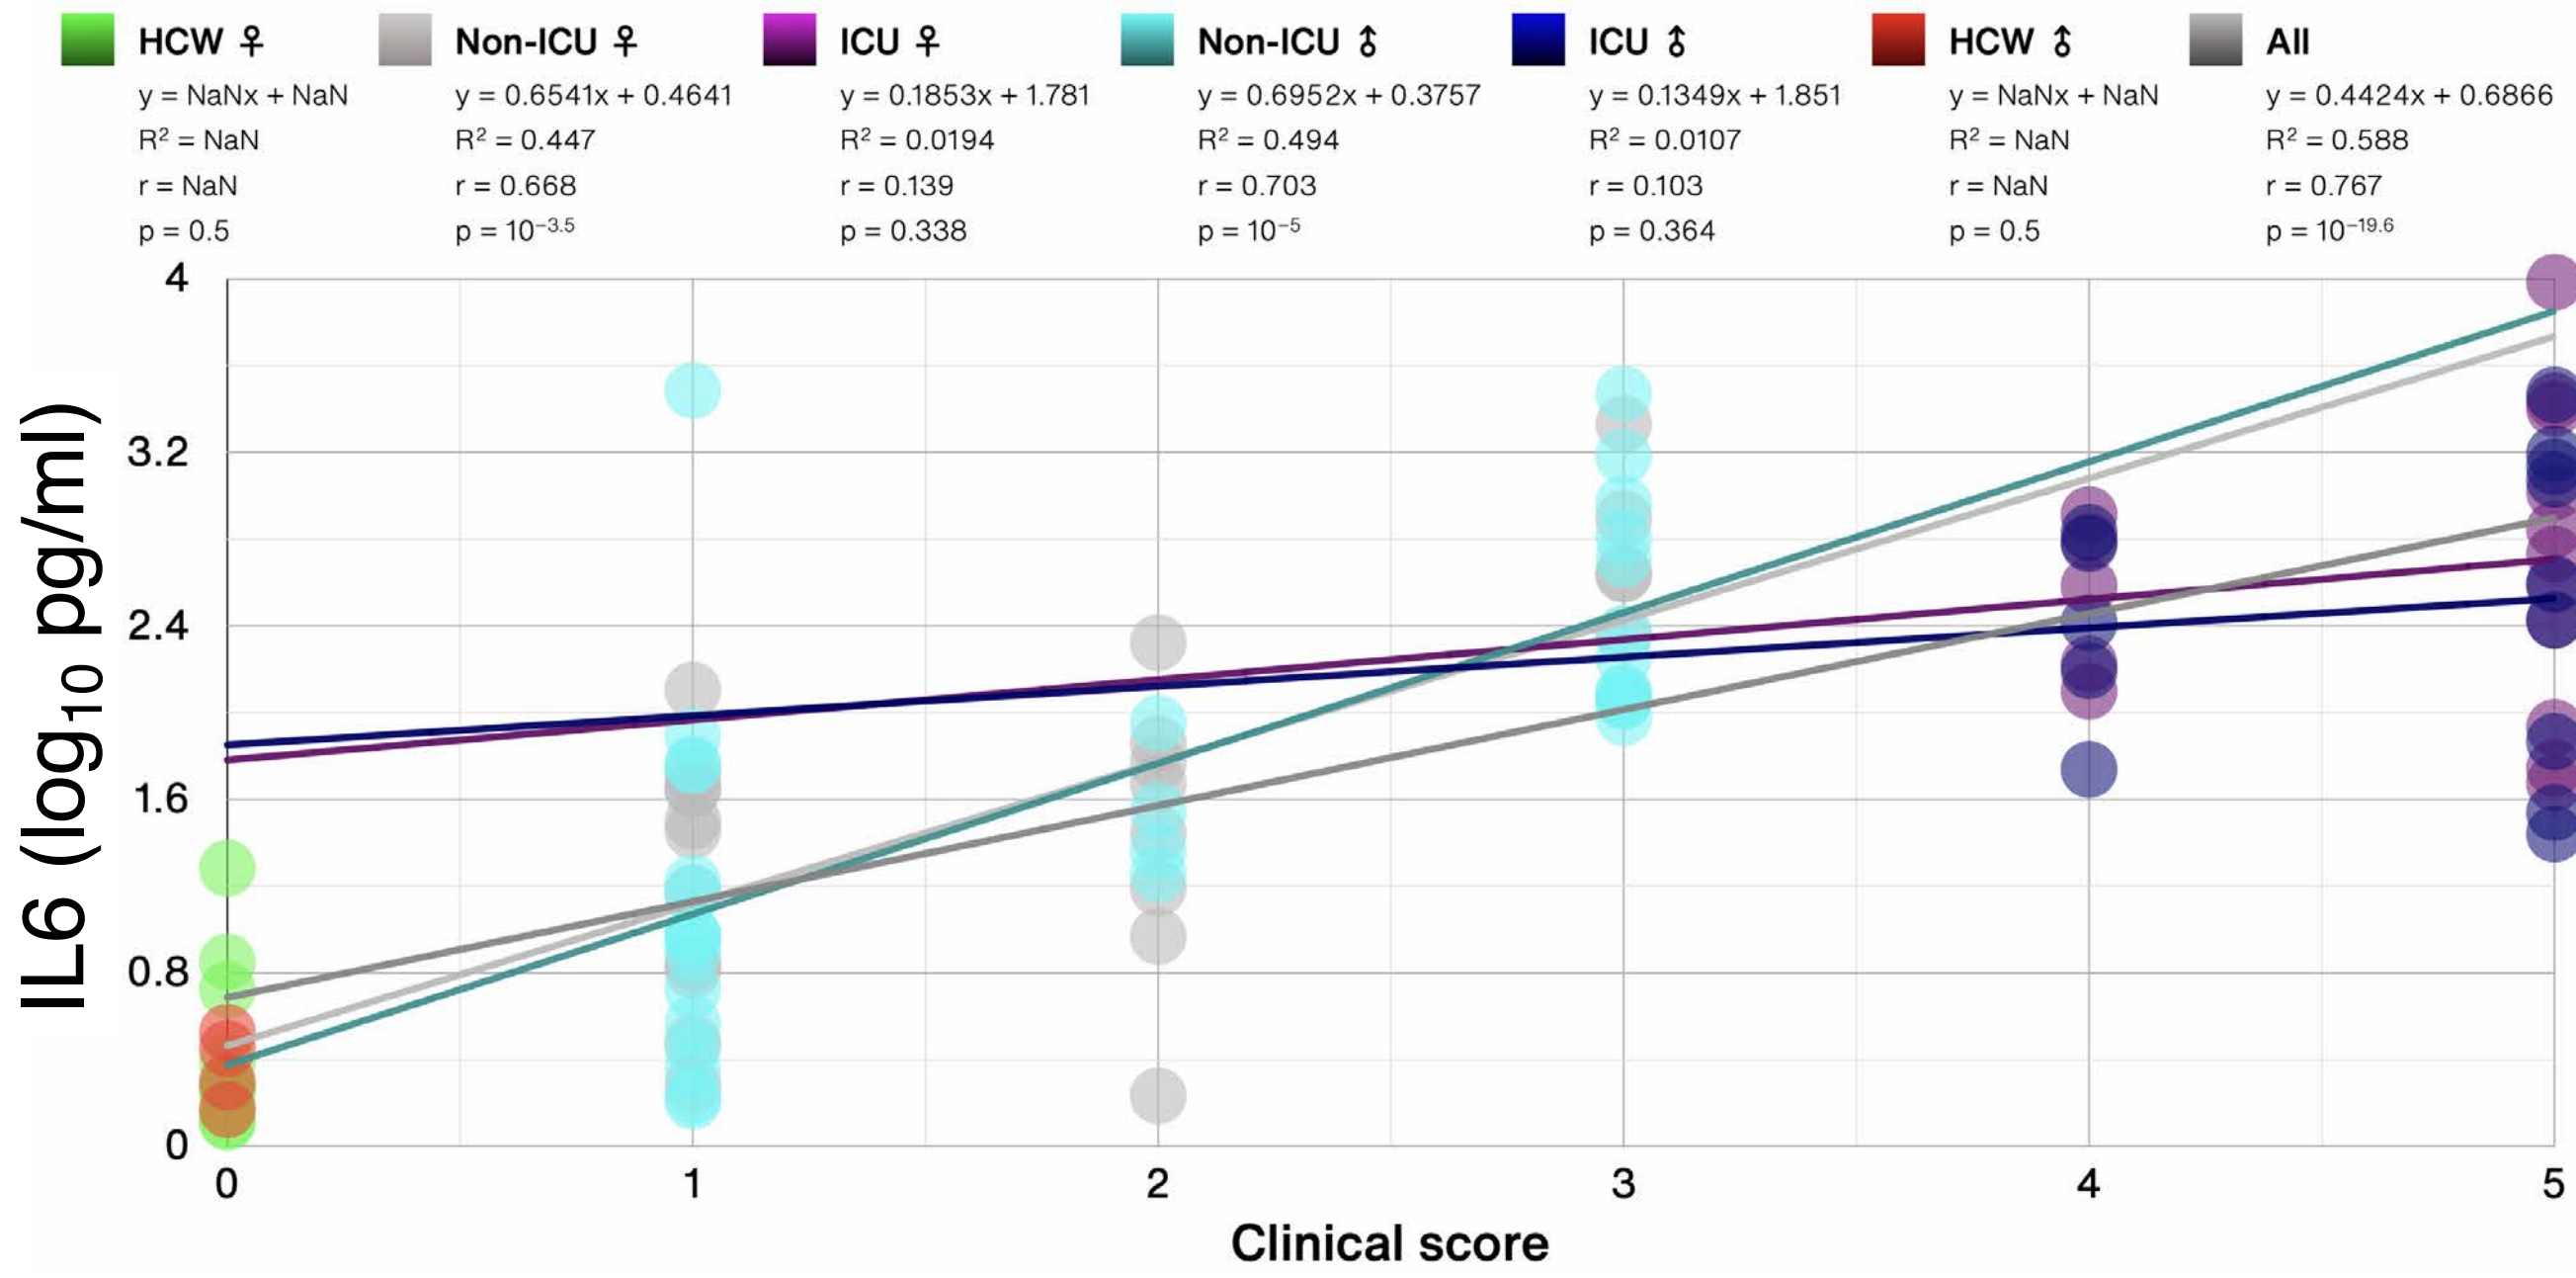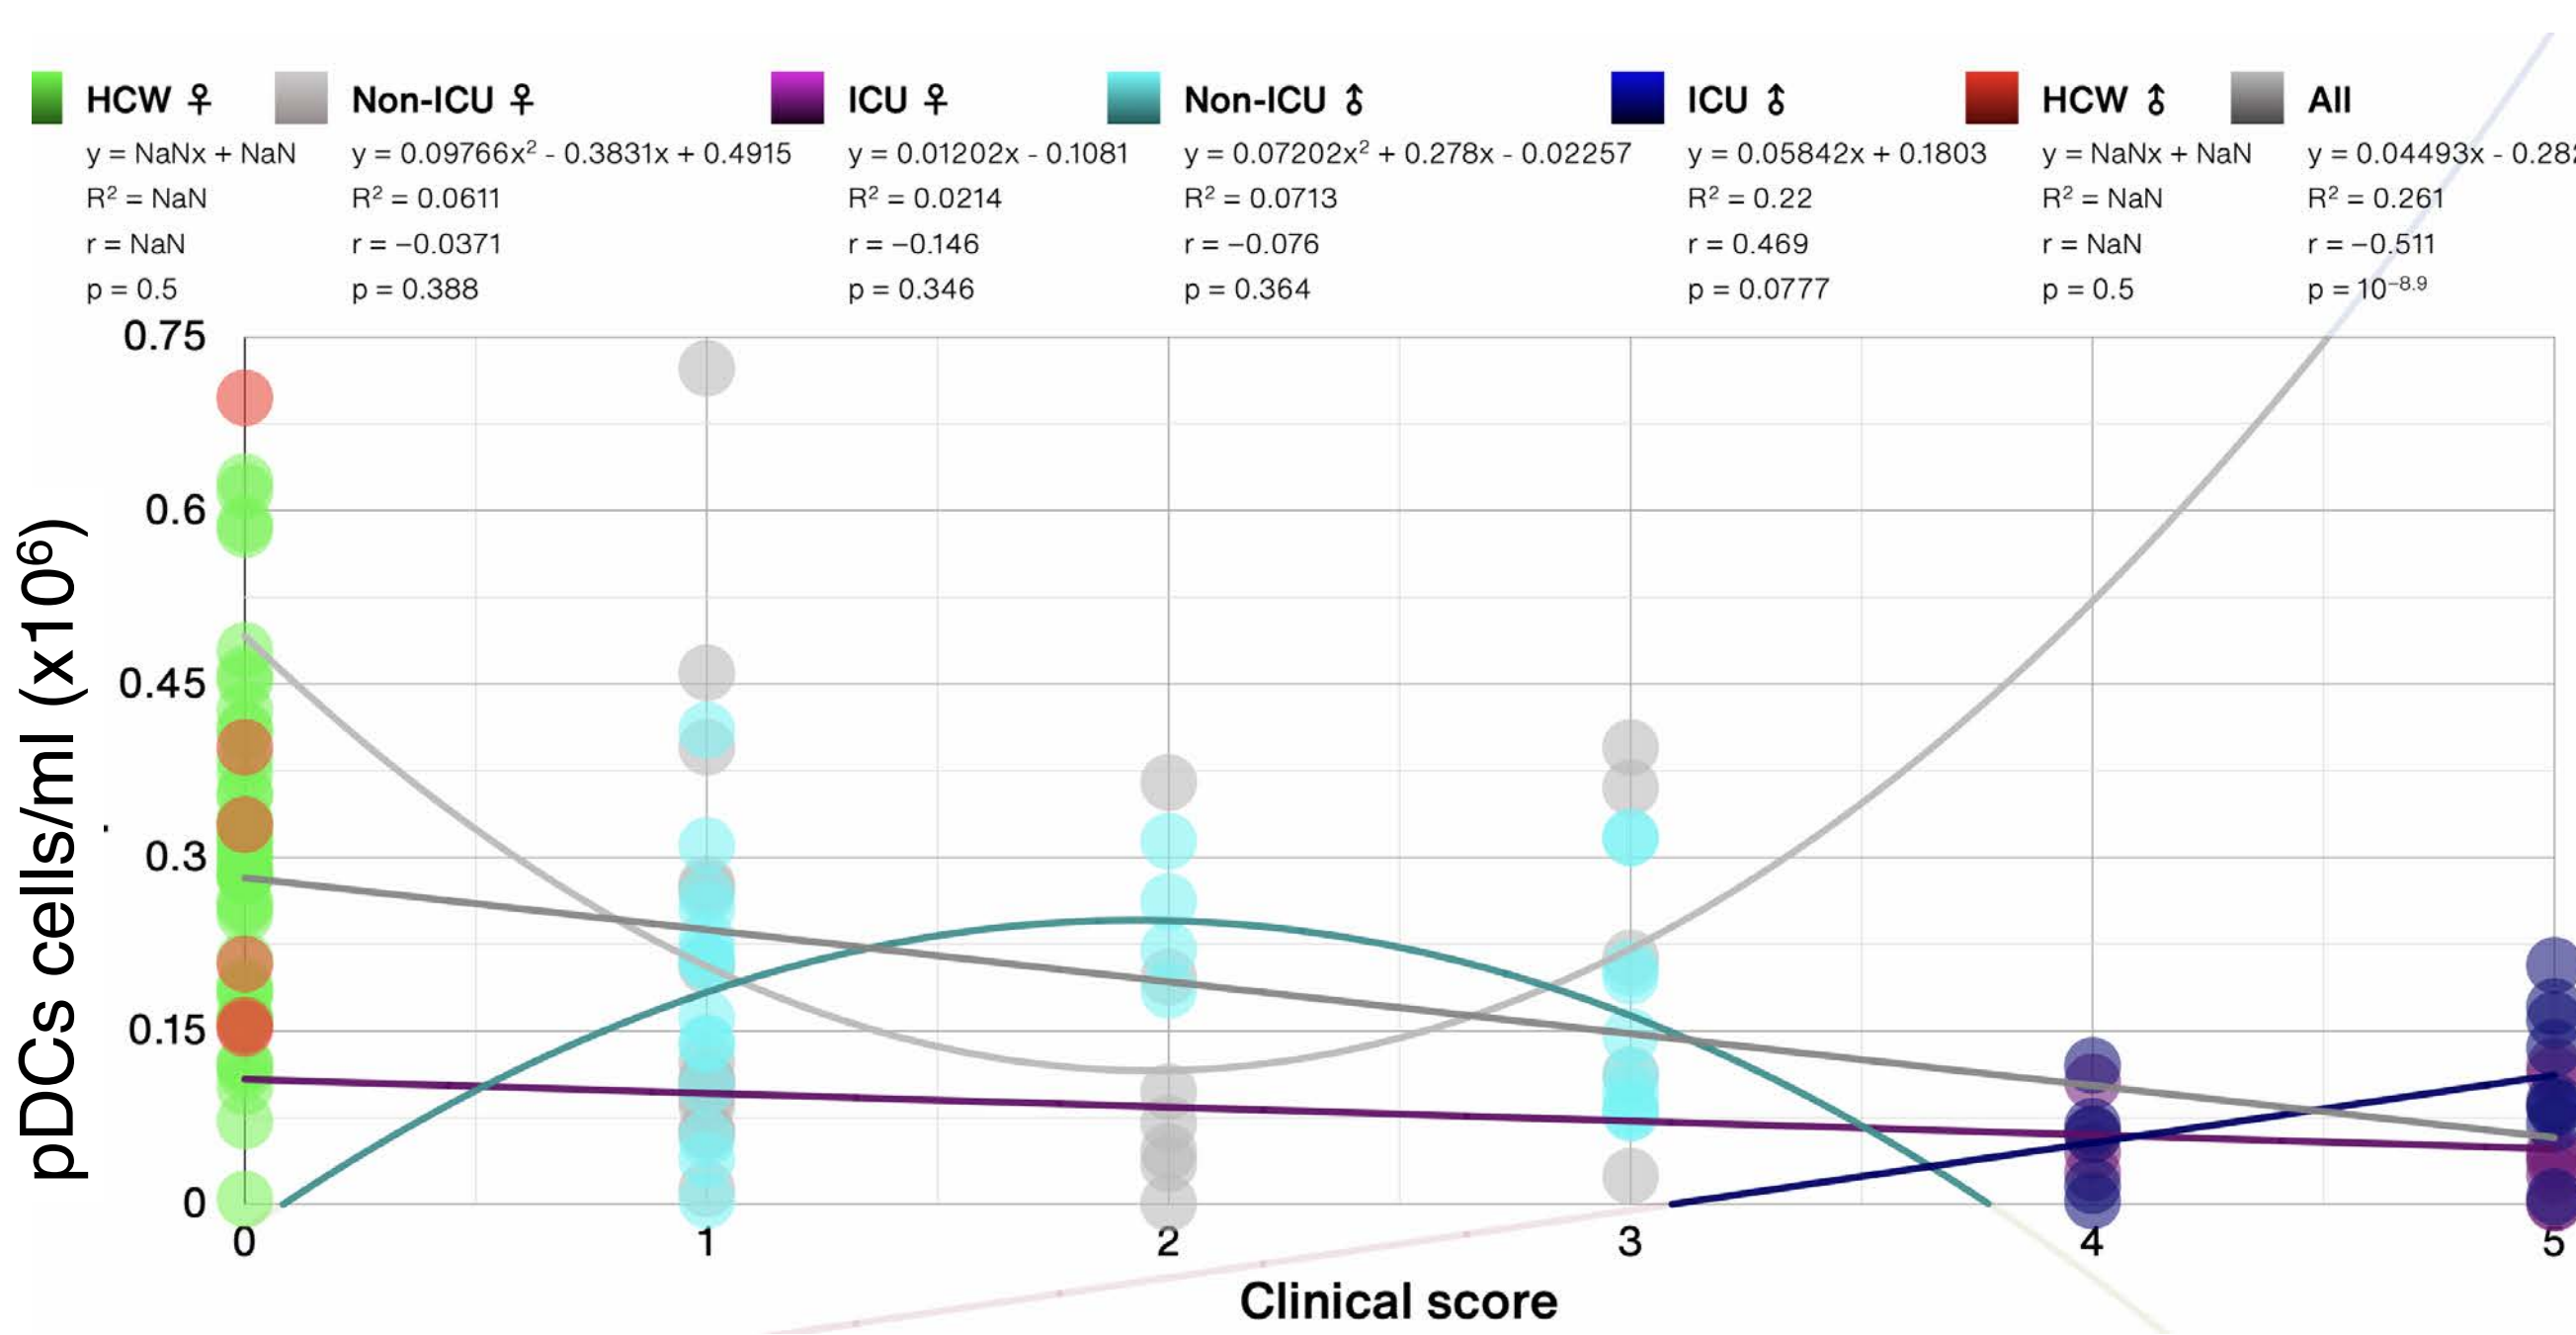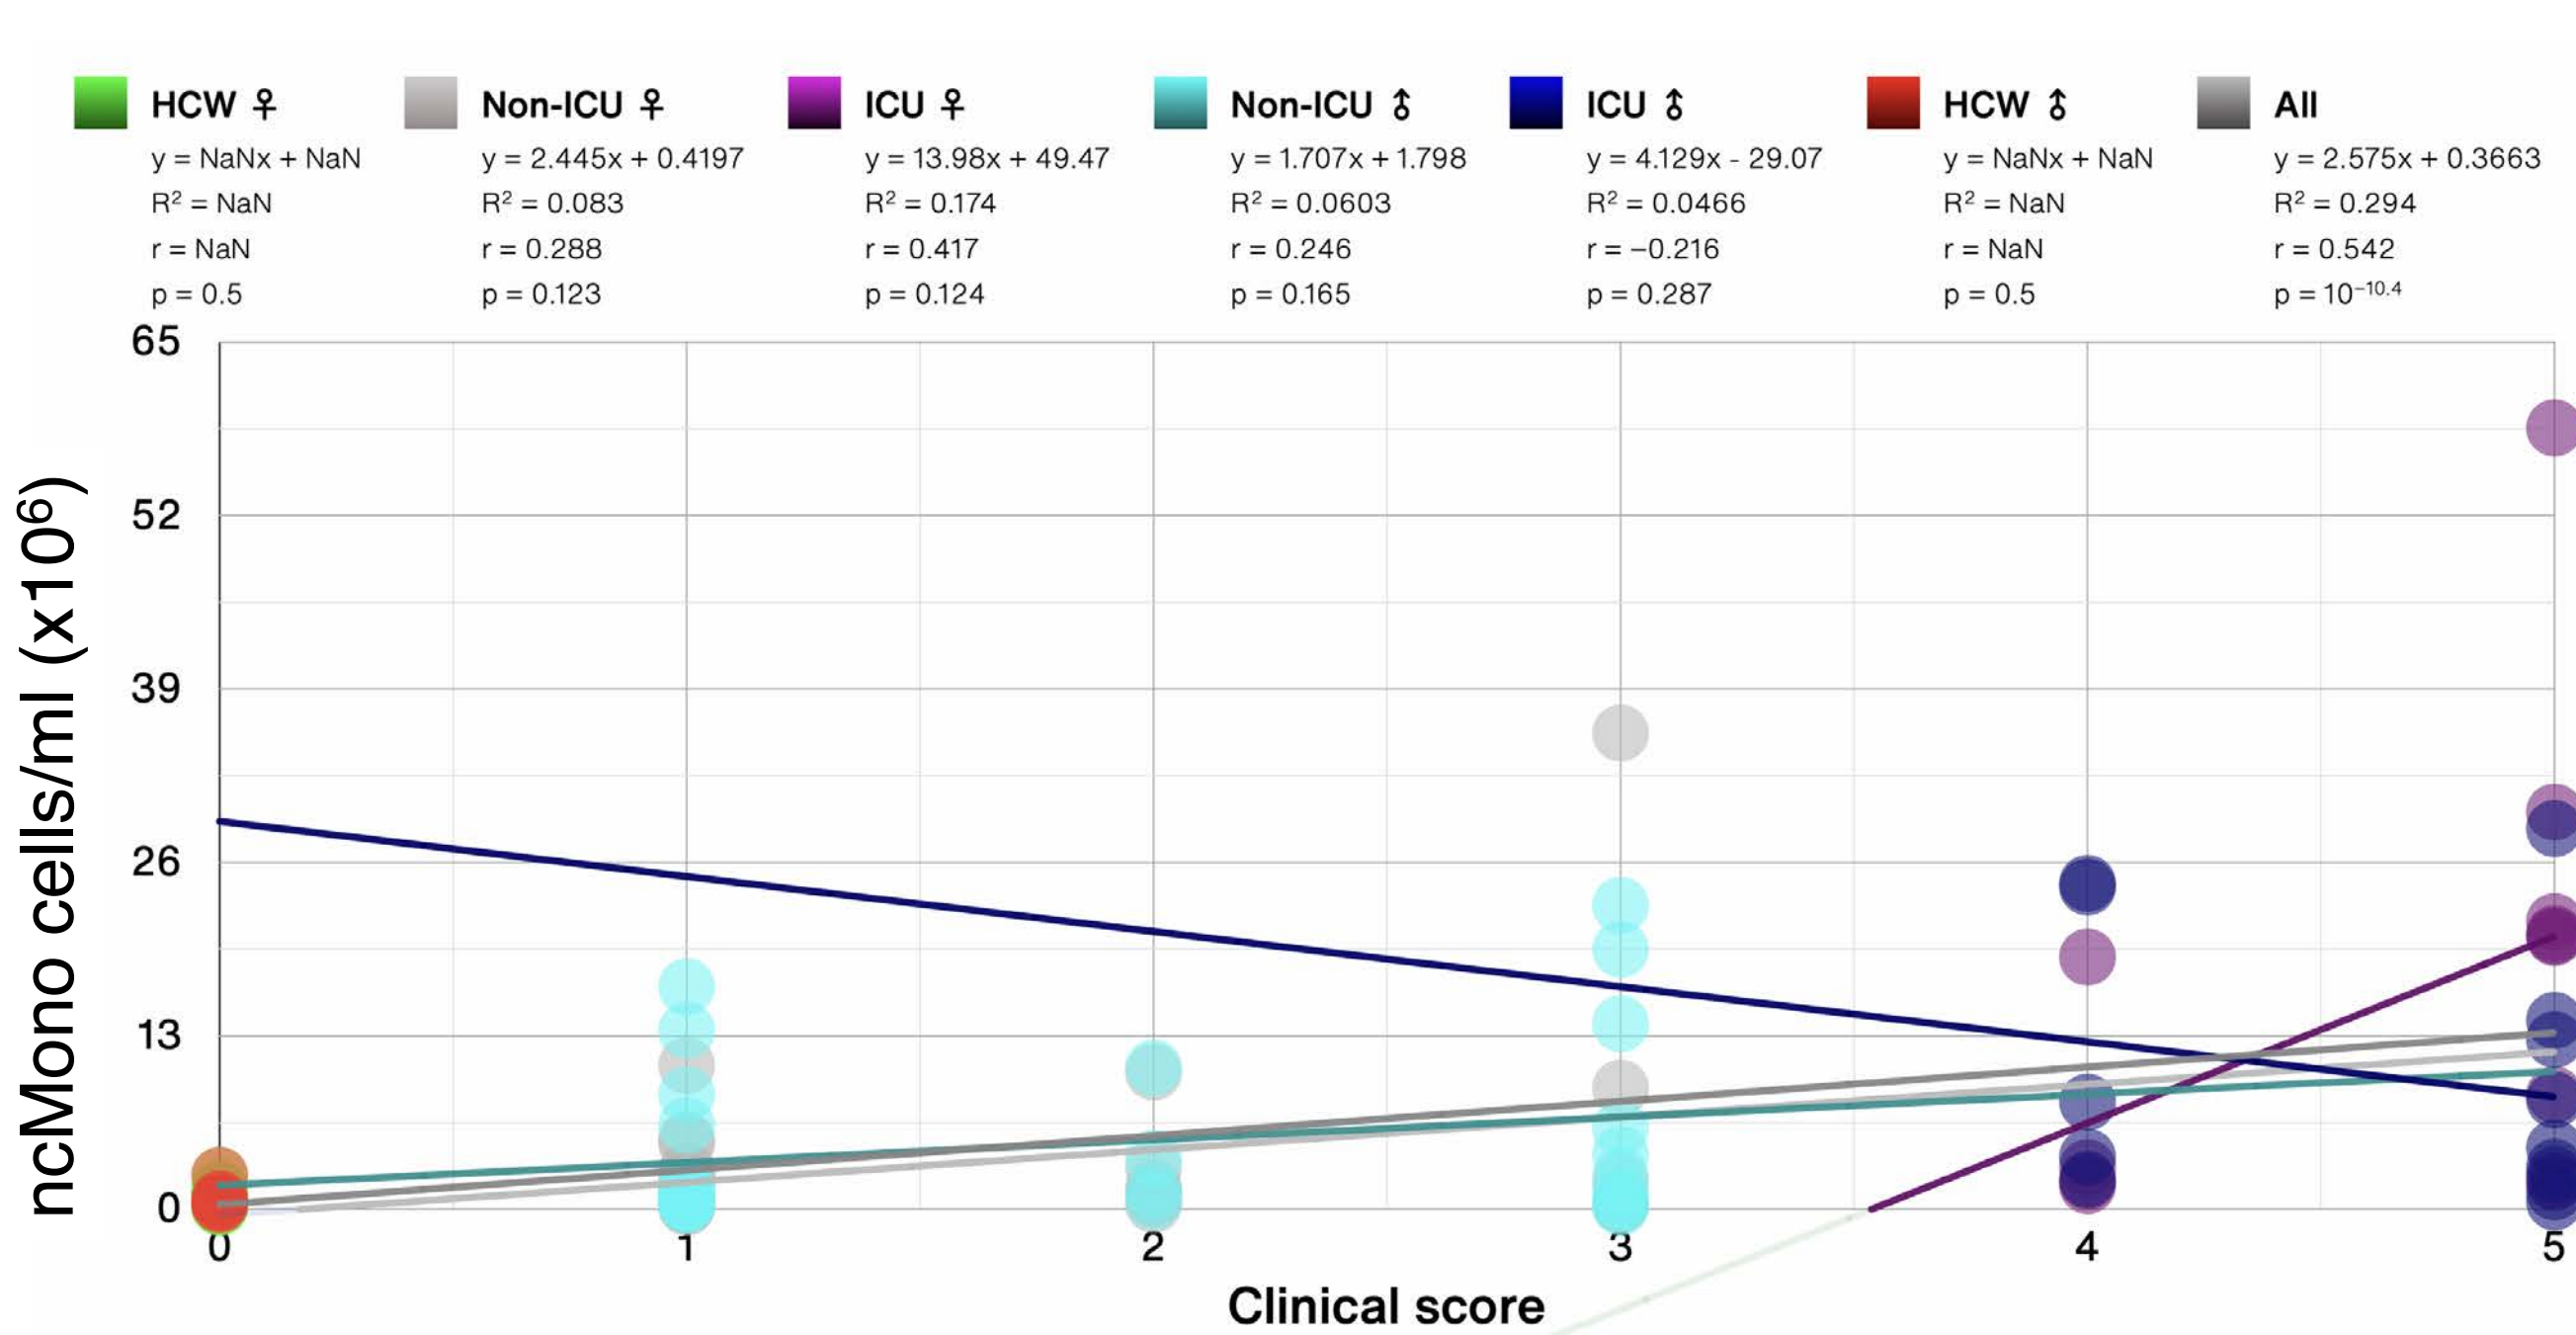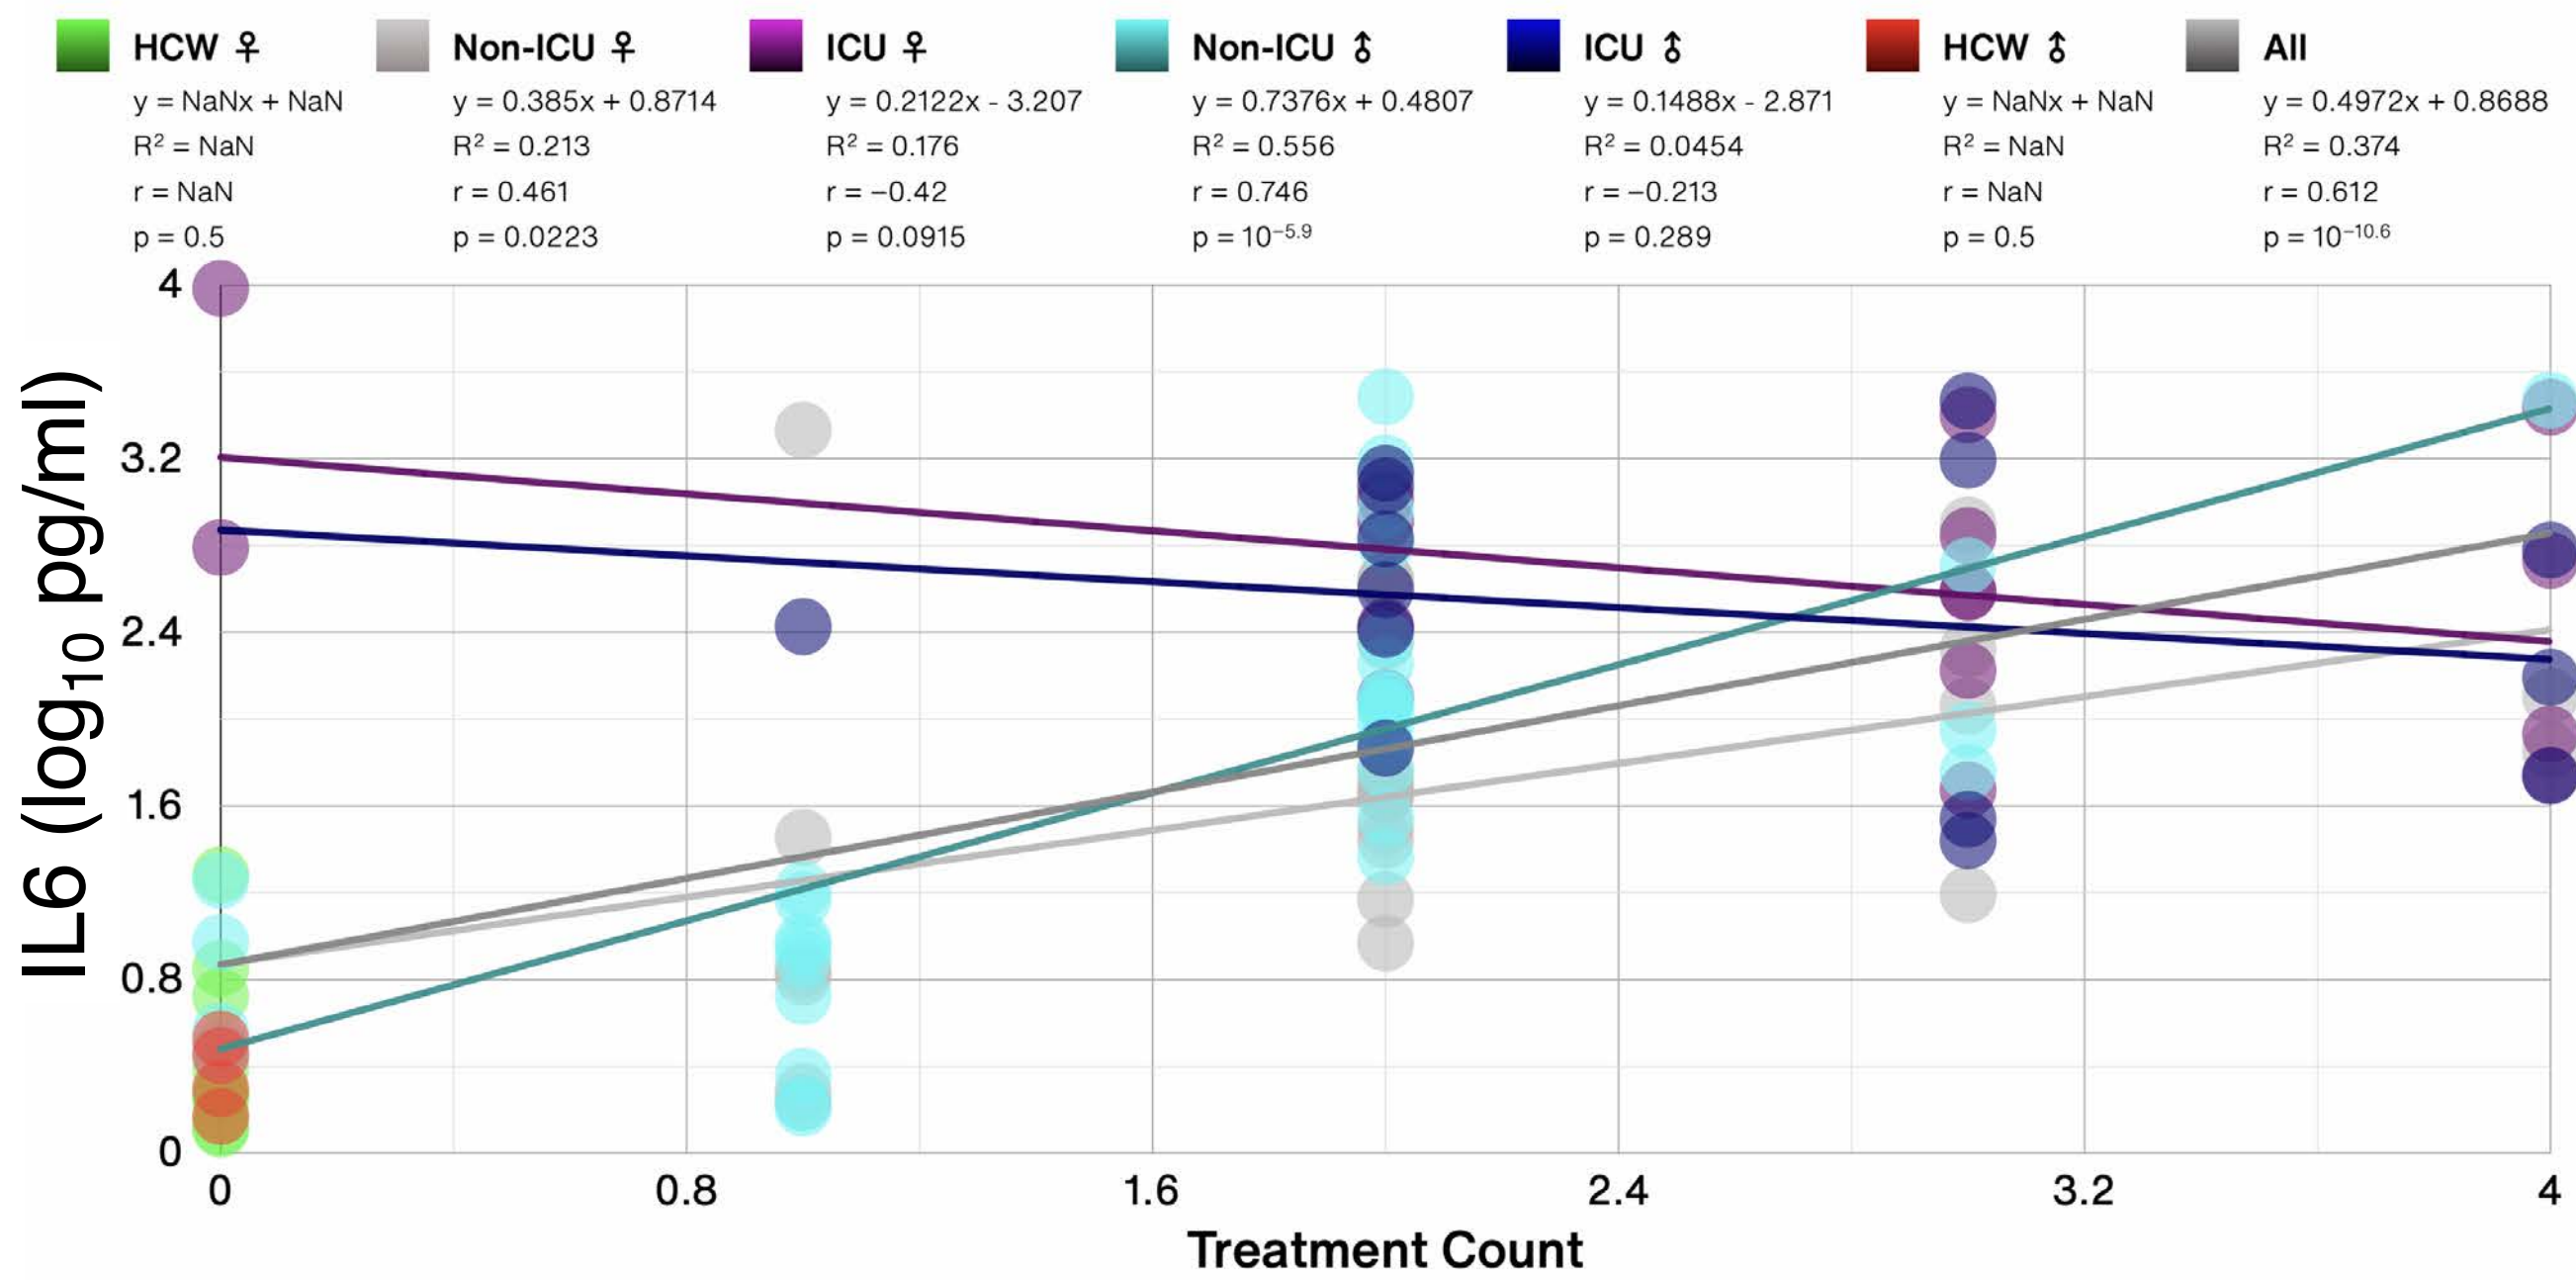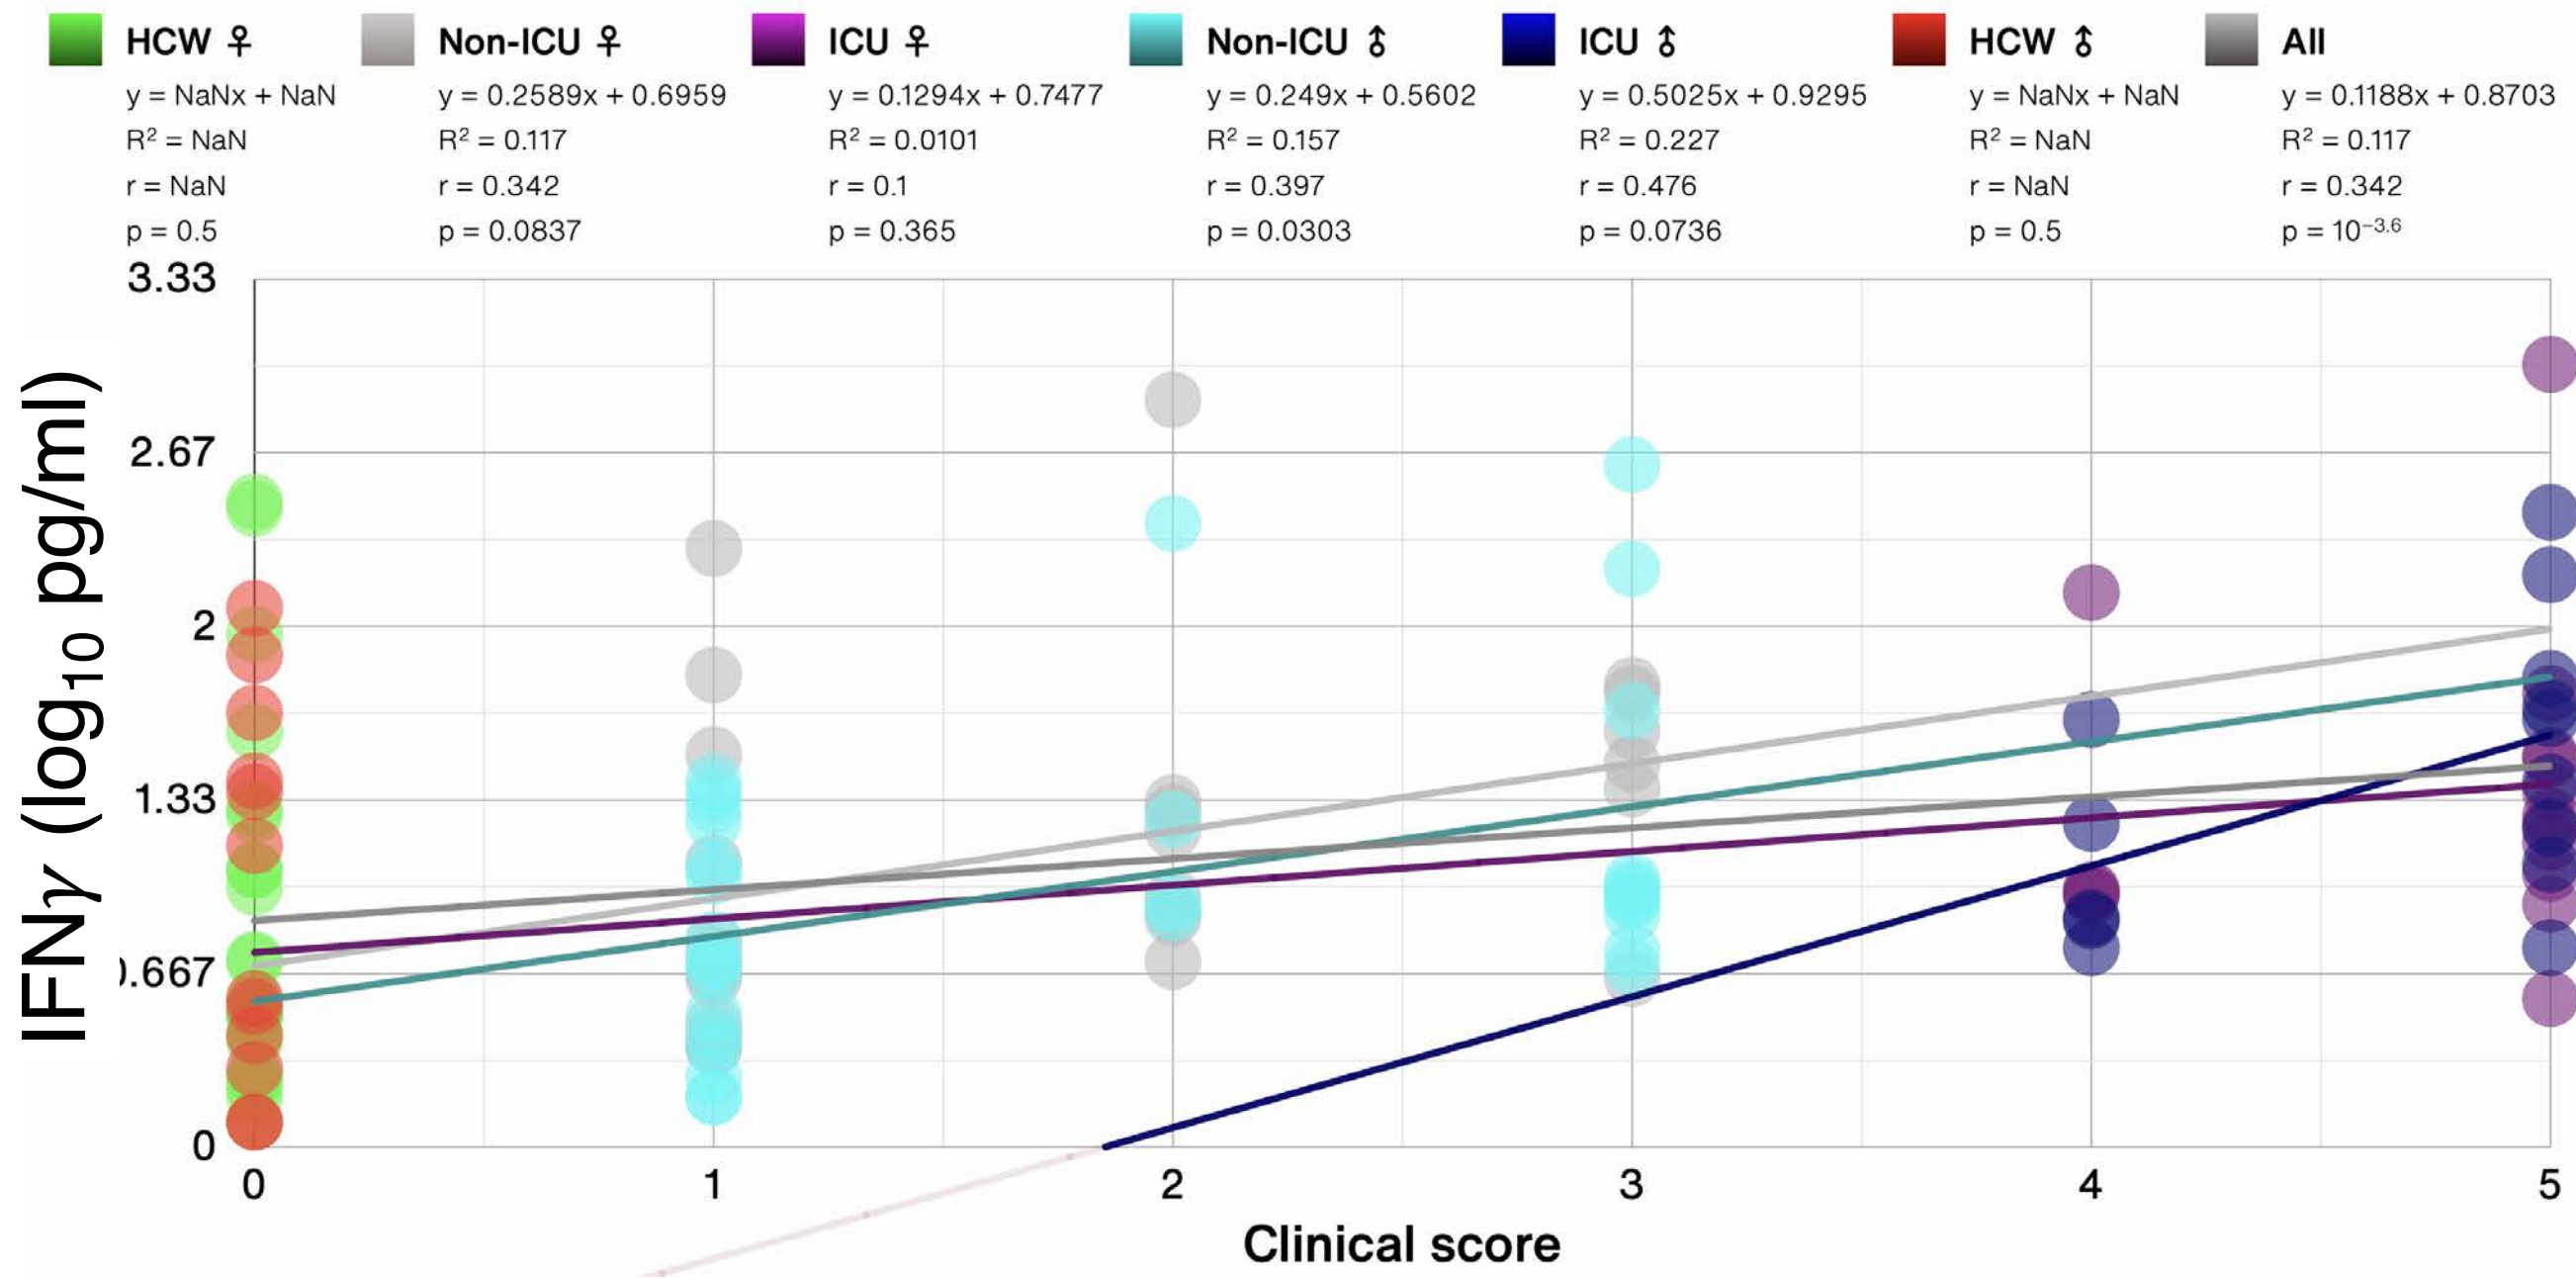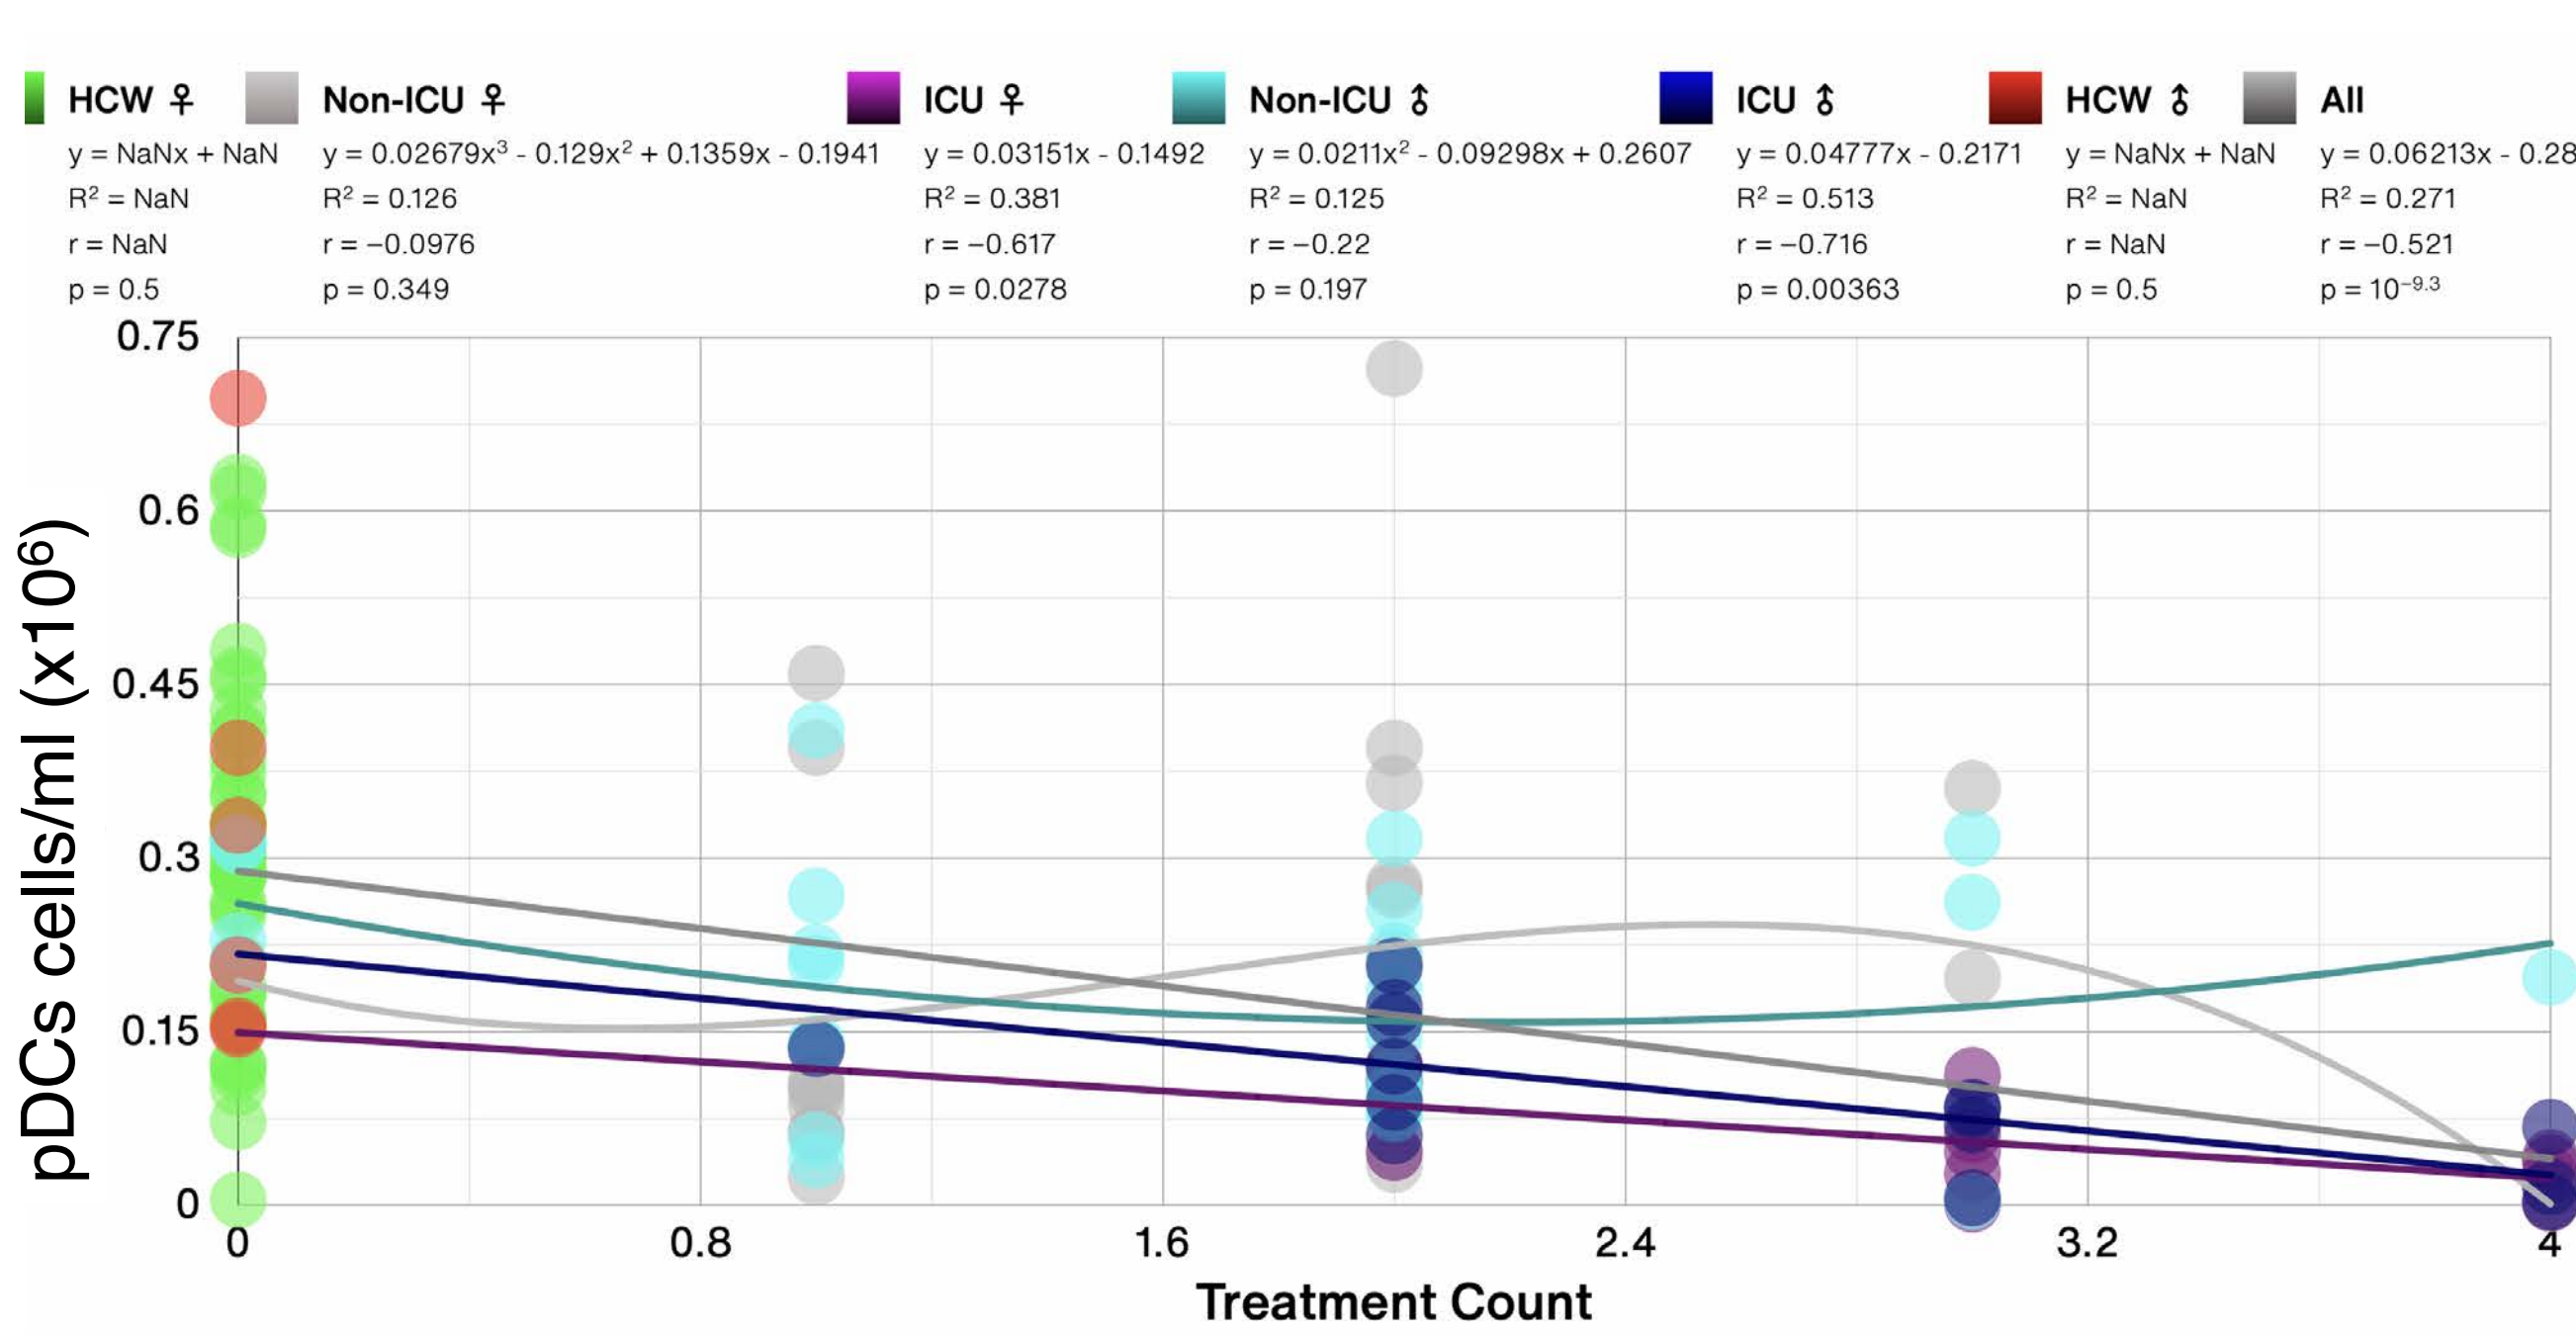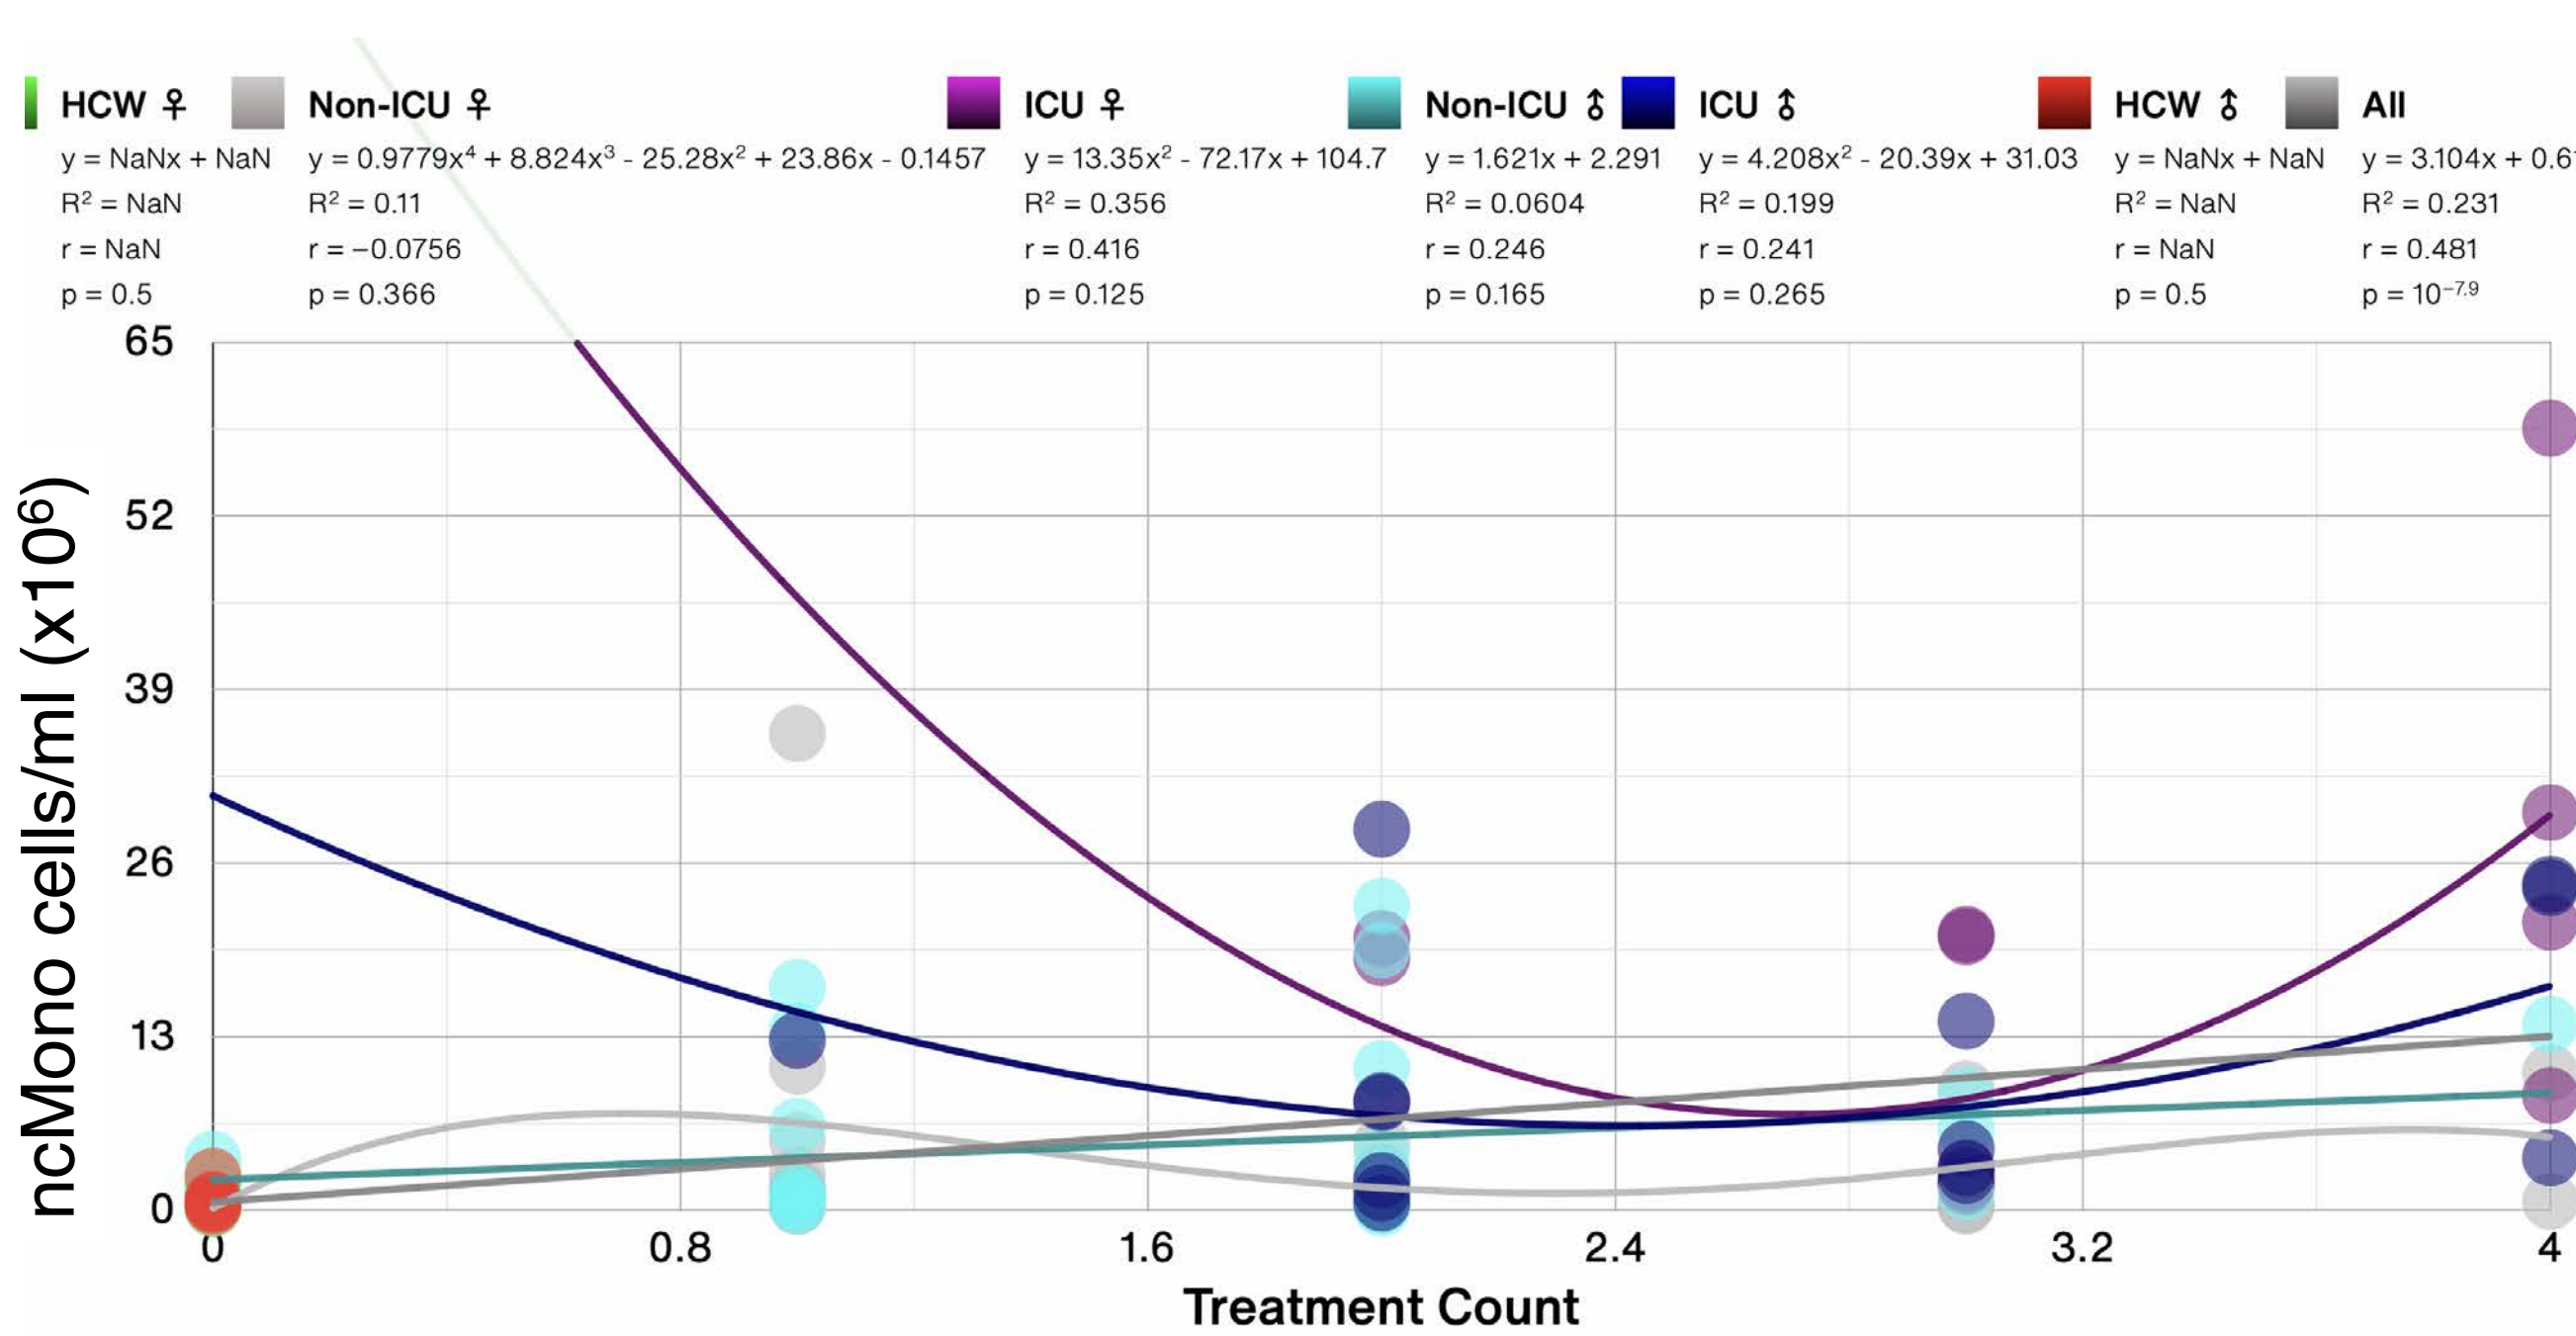

Supplement: Supplementary file 1 [file supplementary]
